# Supplementary material for: Machine learning reveals factors that control ion mobility in anti-perovskite solid electrolytes
Source: Royal Society of Chemistry journal article supplement (doi:10.1039/d2ta03613d), 2022-01-01
Supplement: d2ta03613d1.xlsx [file d2ta03613d1.xlsx]

## Sheet: Vacancy data
V_a	V_octa	rho_m	PF_A	t	Di	CN_C	CCD	COD	CFD	AAD	PW_c	PW_2c	PW	w_LEO	B	Eg	eps_e	eps_i	eps	alpha	r_C	m_C	EN_C	alpha_C	BC_C	BEC_C	r_O	m_O	EN_O	alpha_O	BC_O	BEC_O	r_F	m_F	EN_F	alpha_F	BC_F	BEC_F	I_C-Ch	I_C-H	I_Ch-H	Ed	Ef	Energy barrier (target)
45.5221	43.6822	2.35762	0.275522	0.753405	2.24563	4	4.35768	3.20616	3.60835	4.9513	0.51399	0.976	1.48999	0.454	11.3828	3.73612	3.01387	2.92797	5.94184	4.36508	1.52	39.0983	0.82	1.205	0.494893	1.10226	1.84	78.96	2.55	9.93	6.91527	1.9344	2.06	126.904	2.66	6.66	7.53888	1.3612	1.73	1.84	0.11	45.2901	2.57763	223.5
45.5221	43.6822	2.35762	0.275522	0.753405	2.24563	4	4.67555	3.20548	3.60682	4.9513	0.362533	1.51283	1.87536	0.454	11.3828	3.73612	3.01387	2.92797	5.94184	4.36508	1.52	39.0983	0.82	1.205	0.505608	1.10303	1.84	78.96	2.55	9.93	6.91527	1.9344	2.06	126.904	2.66	6.66	7.53888	1.3612	1.73	1.84	0.11	45.2901	2.57778	265
45.5221	43.6822	2.35762	0.275522	0.753405	2.24563	4	4.70208	3.20578	3.60963	4.9513	0.341471	1.18072	1.52219	0.454	11.3828	3.73612	3.01387	2.92797	5.94184	4.36508	1.52	39.0983	0.82	1.205	0.455112	1.10366	1.84	78.96	2.55	9.93	6.91527	1.9344	2.06	126.904	2.66	6.66	7.53888	1.3612	1.73	1.84	0.11	45.2901	2.57358	374
45.5221	43.6822	2.35762	0.275522	0.753405	2.24563	4	4.40069	3.20487	3.60733	4.9513	0.498631	1.30297	1.8016	0.454	11.3828	3.73612	3.01387	2.92797	5.94184	4.36508	1.52	39.0983	0.82	1.205	0.483918	1.10242	1.84	78.96	2.55	9.93	6.91527	1.9344	2.06	126.904	2.66	6.66	7.53888	1.3612	1.73	1.84	0.11	45.2901	2.57723	169.5
45.5221	43.6822	2.35762	0.275522	0.753405	2.24563	4	4.44845	3.19536	3.615	4.9513	0.456785	0.930614	1.3874	0.454	11.3828	3.73612	3.01387	2.92797	5.94184	4.36508	1.52	39.0983	0.82	1.205	0.475077	1.08904	1.84	78.96	2.55	9.93	6.91527	1.9344	2.06	126.904	2.66	6.66	7.53888	1.3612	1.73	1.84	0.11	45.2901	2.58423	228.5
45.5221	43.6822	2.35762	0.275522	0.753405	2.24563	4	4.70039	3.20513	3.60845	4.9513	0.339306	1.1777	1.51701	0.454	11.3828	3.73612	3.01387	2.92797	5.94184	4.36508	1.52	39.0983	0.82	1.205	0.504054	1.10277	1.84	78.96	2.55	9.93	6.91527	1.9344	2.06	126.904	2.66	6.66	7.53888	1.3612	1.73	1.84	0.11	45.2901	2.57813	372.5
45.5221	43.6822	2.35762	0.275522	0.753405	2.24563	4	4.59514	3.19475	3.61551	4.9513	0.384942	1.37822	1.76316	0.454	11.3828	3.73612	3.01387	2.92797	5.94184	4.36508	1.52	39.0983	0.82	1.205	0.453387	1.08843	1.84	78.96	2.55	9.93	6.91527	1.9344	2.06	126.904	2.66	6.66	7.53888	1.3612	1.73	1.84	0.11	45.2901	2.58368	190
45.5221	43.6822	2.35762	0.275522	0.753405	2.24563	4	4.40498	3.20445	3.60693	4.9513	0.494407	1.29324	1.78765	0.454	11.3828	3.73612	3.01387	2.92797	5.94184	4.36508	1.52	39.0983	0.82	1.205	0.514769	1.10353	1.84	78.96	2.55	9.93	6.91527	1.9344	2.06	126.904	2.66	6.66	7.53888	1.3612	1.73	1.84	0.11	45.2901	2.57828	172.5
45.5221	43.6822	2.35762	0.275522	0.753405	2.24563	4	4.58943	3.19498	3.61628	4.9513	0.390248	1.3623	1.75255	0.454	11.3828	3.73612	3.01387	2.92797	5.94184	4.36508	1.52	39.0983	0.82	1.205	0.470452	1.09044	1.84	78.96	2.55	9.93	6.91527	1.9344	2.06	126.904	2.66	6.66	7.53888	1.3612	1.73	1.84	0.11	45.2901	2.58018	188
45.5221	43.6822	2.35762	0.275522	0.753405	2.24563	4	4.36406	3.20475	3.60973	4.9513	0.507132	0.968246	1.47538	0.454	11.3828	3.73612	3.01387	2.92797	5.94184	4.36508	1.52	39.0983	0.82	1.205	0.499429	1.10417	1.84	78.96	2.55	9.93	6.91527	1.9344	2.06	126.904	2.66	6.66	7.53888	1.3612	1.73	1.84	0.11	45.2901	2.57408	234.5
45.5221	43.6822	2.35762	0.275522	0.753405	2.24563	4	4.67062	3.20384	3.60743	4.9513	0.360262	1.51402	1.87429	0.454	11.3828	3.73612	3.01387	2.92797	5.94184	4.36508	1.52	39.0983	0.82	1.205	0.493079	1.10292	1.84	78.96	2.55	9.93	6.91527	1.9344	2.06	126.904	2.66	6.66	7.53888	1.3612	1.73	1.84	0.11	45.2901	2.57773	268
45.5221	43.6822	2.35762	0.275522	0.753405	2.24563	4	4.45022	3.19437	3.61679	4.9513	0.457108	0.922287	1.3794	0.454	11.3828	3.73612	3.01387	2.92797	5.94184	4.36508	1.52	39.0983	0.82	1.205	0.448762	1.08983	1.84	78.96	2.55	9.93	6.91527	1.9344	2.06	126.904	2.66	6.66	7.53888	1.3612	1.73	1.84	0.11	45.2901	2.57963	230.5
41.9993	43.2404	2.18372	0.244511	0.702898	2.19046	4	4.65468	3.2068	3.33445	4.5855	0.36613	1.43648	1.80261	0.635	12.0254	3.81165	2.92549	2.06802	4.99351	3.91963	1.52	39.0983	0.82	1.205	0.465869	1.0355	1.84	78.96	2.55	9.93	6.9649	1.9096	1.82	79.904	2.96	4.54	7.65046	1.1903	1.73	2.14	0.41	57.8826	2.59491	301
41.9993	43.2404	2.18372	0.244511	0.702898	2.19046	4	5.18284	3.20675	3.33517	4.5855	0.0722327	1.42453	1.49676	0.635	12.0254	3.81165	2.92549	2.06802	4.99351	3.91963	1.52	39.0983	0.82	1.205	0.461178	1.03554	1.84	78.96	2.55	9.93	6.9649	1.9096	1.82	79.904	2.96	4.54	7.65046	1.1903	1.73	2.14	0.41	57.8826	2.59526	566.5
41.9993	43.2404	2.18372	0.244511	0.702898	2.19046	4	5.08899	3.20264	3.32028	4.5855	0.139849	1.29925	1.4391	0.635	12.0254	3.81165	2.92549	2.06802	4.99351	3.91963	1.52	39.0983	0.82	1.205	0.416937	1.02997	1.84	78.96	2.55	9.93	6.9649	1.9096	1.82	79.904	2.96	4.54	7.65046	1.1903	1.73	2.14	0.41	57.8826	2.56491	638.5
41.9993	43.2404	2.18372	0.244511	0.702898	2.19046	4	4.32126	3.20333	3.32069	4.5855	0.524953	1.40452	1.92947	0.635	12.0254	3.81165	2.92549	2.06802	4.99351	3.91963	1.52	39.0983	0.82	1.205	0.447346	1.03011	1.84	78.96	2.55	9.93	6.9649	1.9096	1.82	79.904	2.96	4.54	7.65046	1.1903	1.73	2.14	0.41	57.8826	2.56586	38
41.9993	43.2404	2.18372	0.244511	0.702898	2.19046	4	4.5513	3.212	3.34391	4.5855	0.444185	1.40999	1.85418	0.635	12.0254	3.81165	2.92549	2.06802	4.99351	3.91963	1.52	39.0983	0.82	1.205	0.462778	1.0394	1.84	78.96	2.55	9.93	6.9649	1.9096	1.82	79.904	2.96	4.54	7.65046	1.1903	1.73	2.14	0.41	57.8826	2.59831	176
41.9993	43.2404	2.18372	0.244511	0.702898	2.19046	4	4.33323	3.20707	3.33449	4.5855	0.575536	0.805767	1.3813	0.635	12.0254	3.81165	2.92549	2.06802	4.99351	3.91963	1.52	39.0983	0.82	1.205	0.460359	1.03557	1.84	78.96	2.55	9.93	6.9649	1.9096	1.82	79.904	2.96	4.54	7.65046	1.1903	1.73	2.14	0.41	57.8826	2.59366	374
41.9993	43.2404	2.18372	0.244511	0.702898	2.19046	4	4.18793	3.20858	3.32942	4.5855	0.160035	1.44826	1.60829	0.635	12.0254	3.81165	2.92549	2.06802	4.99351	3.91963	1.52	39.0983	0.82	1.205	0.448946	1.03396	1.84	78.96	2.55	9.93	6.9649	1.9096	1.82	79.904	2.96	4.54	7.65046	1.1903	1.73	2.14	0.41	57.8826	2.56891	422
41.9993	43.2404	2.18372	0.244511	0.702898	2.19046	4	4.26007	3.20702	3.33522	4.5855	0.626301	0.883793	1.51009	0.635	12.0254	3.81165	2.92549	2.06802	4.99351	3.91963	1.52	39.0983	0.82	1.205	0.455668	1.03561	1.84	78.96	2.55	9.93	6.9649	1.9096	1.82	79.904	2.96	4.54	7.65046	1.1903	1.73	2.14	0.41	57.8826	2.59401	212.5
41.9993	43.2404	2.18372	0.244511	0.702898	2.19046	4	4.18785	3.20784	3.32974	4.5855	0.636535	0.922126	1.55866	0.635	12.0254	3.81165	2.92549	2.06802	4.99351	3.91963	1.52	39.0983	0.82	1.205	0.437512	1.03386	1.84	78.96	2.55	9.93	6.9649	1.9096	1.82	79.904	2.96	4.54	7.65046	1.1903	1.73	2.14	0.41	57.8826	2.56831	116.5
41.9993	43.2404	2.18372	0.244511	0.702898	2.19046	4	4.18904	3.20292	3.32033	4.5855	0.661069	0.870702	1.53177	0.635	12.0254	3.81165	2.92549	2.06802	4.99351	3.91963	1.52	39.0983	0.82	1.205	0.435093	1.03004	1.84	78.96	2.55	9.93	6.9649	1.9096	1.82	79.904	2.96	4.54	7.65046	1.1903	1.73	2.14	0.41	57.8826	2.56366	200
41.9993	43.2404	2.18372	0.244511	0.702898	2.19046	4	4.47801	3.2036	3.32073	4.5855	0.503781	1.36051	1.86429	0.635	12.0254	3.81165	2.92549	2.06802	4.99351	3.91963	1.52	39.0983	0.82	1.205	0.441835	1.03018	1.84	78.96	2.55	9.93	6.9649	1.9096	1.82	79.904	2.96	4.54	7.65046	1.1903	1.73	2.14	0.41	57.8826	2.56461	101
41.9993	43.2404	2.18372	0.244511	0.702898	2.19046	4	4.3135	3.20442	3.31526	4.5855	0.558733	0.765054	1.32379	0.635	12.0254	3.81165	2.92549	2.06802	4.99351	3.91963	1.52	39.0983	0.82	1.205	0.423679	1.02842	1.84	78.96	2.55	9.93	6.9649	1.9096	1.82	79.904	2.96	4.54	7.65046	1.1903	1.73	2.14	0.41	57.8826	2.53891	392.5
38.547	42.4928	1.99632	0.236611	0.671331	2.09472	4	4.59575	3.22093	3.12956	4.4309	0.348204	1.43391	1.78212	0.691	12.0615	3.9093	2.95238	4.21423	7.16662	3.62788	1.52	39.0983	0.82	1.205	0.463577	1.04363	1.84	78.96	2.55	9.93	6.87591	1.9213	1.67	35.453	3.16	3.36	7.61288	1.2107	1.73	2.34	0.61	59.4136	2.52528	384.5
38.547	42.4928	1.99632	0.236611	0.671331	2.09472	4	5.0828	3.2217	3.12981	4.4309	-0.174379	1.3334	1.15902	0.691	12.0615	3.9093	2.95238	4.21423	7.16662	3.62788	1.52	39.0983	0.82	1.205	0.458823	1.04359	1.84	78.96	2.55	9.93	6.87591	1.9213	1.67	35.453	3.16	3.36	7.61288	1.2107	1.73	2.34	0.61	59.4136	2.52493	846.5
38.547	42.4928	1.99632	0.236611	0.671331	2.09472	4	5.38614	3.21505	3.14874	4.4309	0.0013913	1.28969	1.29108	0.691	12.0615	3.9093	2.95238	4.21423	7.16662	3.62788	1.52	39.0983	0.82	1.205	0.557554	1.04922	1.84	78.96	2.55	9.93	6.87591	1.9213	1.67	35.453	3.16	3.36	7.61288	1.2107	1.73	2.34	0.61	59.4136	2.47968	796.5
38.547	42.4928	1.99632	0.236611	0.671331	2.09472	4	4.21666	3.21548	3.14816	4.4309	0.587797	1.37216	1.95996	0.691	12.0615	3.9093	2.95238	4.21423	7.16662	3.62788	1.52	39.0983	0.82	1.205	0.476257	1.04922	1.84	78.96	2.55	9.93	6.87591	1.9213	1.67	35.453	3.16	3.36	7.61288	1.2107	1.73	2.34	0.61	59.4136	2.47998	59
38.547	42.4928	1.99632	0.236611	0.671331	2.09472	4	4.5647	3.22117	3.1212	4.4309	0.442283	1.38029	1.82257	0.691	12.0615	3.9093	2.95238	4.21423	7.16662	3.62788	1.52	39.0983	0.82	1.205	0.484882	1.03334	1.84	78.96	2.55	9.93	6.87591	1.9213	1.67	35.453	3.16	3.36	7.61288	1.2107	1.73	2.34	0.61	59.4136	2.56108	264
38.547	42.4928	1.99632	0.236611	0.671331	2.09472	4	4.21631	3.22002	3.13008	4.4309	0.687704	0.691956	1.37966	0.691	12.0615	3.9093	2.95238	4.21423	7.16662	3.62788	1.52	39.0983	0.82	1.205	0.470347	1.04376	1.84	78.96	2.55	9.93	6.87591	1.9213	1.67	35.453	3.16	3.36	7.61288	1.2107	1.73	2.34	0.61	59.4136	2.52583	410.5
38.547	42.4928	1.99632	0.236611	0.671331	2.09472	4	4.09956	3.21494	3.13955	4.4309	0.146329	1.44519	1.59152	0.691	12.0615	3.9093	2.95238	4.21423	7.16662	3.62788	1.52	39.0983	0.82	1.205	0.502316	1.03897	1.84	78.96	2.55	9.93	6.87591	1.9213	1.67	35.453	3.16	3.36	7.61288	1.2107	1.73	2.34	0.61	59.4136	2.51613	612
38.547	42.4928	1.99632	0.236611	0.671331	2.09472	4	4.14595	3.22079	3.13033	4.4309	0.726952	0.775661	1.50261	0.691	12.0615	3.9093	2.95238	4.21423	7.16662	3.62788	1.52	39.0983	0.82	1.205	0.465593	1.04372	1.84	78.96	2.55	9.93	6.87591	1.9213	1.67	35.453	3.16	3.36	7.61288	1.2107	1.73	2.34	0.61	59.4136	2.52548	264
38.547	42.4928	1.99632	0.236611	0.671331	2.09472	4	4.09902	3.21528	3.14038	4.4309	0.707479	0.768895	1.47637	0.691	12.0615	3.9093	2.95238	4.21423	7.16662	3.62788	1.52	39.0983	0.82	1.205	0.518841	1.03893	1.84	78.96	2.55	9.93	6.87591	1.9213	1.67	35.453	3.16	3.36	7.61288	1.2107	1.73	2.34	0.61	59.4136	2.51548	122
38.547	42.4928	1.99632	0.236611	0.671331	2.09472	4	4.09892	3.21414	3.14926	4.4309	0.786018	0.786018	1.57204	0.691	12.0615	3.9093	2.95238	4.21423	7.16662	3.62788	1.52	39.0983	0.82	1.205	0.504306	1.04934	1.84	78.96	2.55	9.93	6.87591	1.9213	1.67	35.453	3.16	3.36	7.61288	1.2107	1.73	2.34	0.61	59.4136	2.48023	197.5
38.547	42.4928	1.99632	0.236611	0.671331	2.09472	4	4.42223	3.21457	3.14868	4.4309	0.590832	1.28704	1.87788	0.691	12.0615	3.9093	2.95238	4.21423	7.16662	3.62788	1.52	39.0983	0.82	1.205	0.483027	1.04934	1.84	78.96	2.55	9.93	6.87591	1.9213	1.67	35.453	3.16	3.36	7.61288	1.2107	1.73	2.34	0.61	59.4136	2.48053	80
38.547	42.4928	1.99632	0.236611	0.671331	2.09472	4	4.25073	3.20906	3.15872	4.4309	0.626778	0.680261	1.30704	0.691	12.0615	3.9093	2.95238	4.21423	7.16662	3.62788	1.52	39.0983	0.82	1.205	0.536275	1.04455	1.84	78.96	2.55	9.93	6.87591	1.9213	1.67	35.453	3.16	3.36	7.61288	1.2107	1.73	2.34	0.61	59.4136	2.47053	241.5
28.2725	24.8938	2.52851	0.234523	0.876708	2.02065	4.5	3.76022	2.65005	3.29598	4.2814	0.678737	1.08073	1.75947	0.943	19.1158	4.43641	3.27669	4.44999	7.72668	2.91218	1.52	39.0983	0.82	1.205	0.355631	1.11355	1.19	18.9984	3.98	1.2	7.82109	1.3053	1.84	78.96	2.55	9.93	7.0535	2.0343	1.73	3.16	1.43	18.3801	2.34604	185.5
28.2725	24.8938	2.52851	0.234523	0.876708	2.02065	4.5	3.76098	2.64991	3.29591	4.2814	0.677507	1.04393	1.72144	0.943	19.1158	4.43641	3.27669	4.44999	7.72668	2.91218	1.52	39.0983	0.82	1.205	0.363602	1.11354	1.19	18.9984	3.98	1.2	7.82109	1.3053	1.84	78.96	2.55	9.93	7.0535	2.0343	1.73	3.16	1.43	18.3801	2.34584	245
28.2725	24.8938	2.52851	0.234523	0.876708	2.02065	4.5	3.73762	2.64888	3.29578	4.2814	0.690611	1.25435	1.94496	0.943	19.1158	4.43641	3.27669	4.44999	7.72668	2.91218	1.52	39.0983	0.82	1.205	0.364584	1.11353	1.19	18.9984	3.98	1.2	7.82109	1.3053	1.84	78.96	2.55	9.93	7.0535	2.0343	1.73	3.16	1.43	18.3801	2.34774	247.5
28.2725	24.8938	2.52851	0.234523	0.876708	2.02065	4.5	3.73421	2.64888	3.29571	4.2814	0.689443	1.0872	1.77665	0.943	19.1158	4.43641	3.27669	4.44999	7.72668	2.91218	1.52	39.0983	0.82	1.205	0.371181	1.11354	1.19	18.9984	3.98	1.2	7.82109	1.3053	1.84	78.96	2.55	9.93	7.0535	2.0343	1.73	3.16	1.43	18.3801	2.34819	203.5
28.2725	24.8938	2.52851	0.234523	0.876708	2.02065	5	3.72521	2.65743	3.28404	4.2814	0.706073	1.03383	1.7399	0.943	19.1158	4.43641	3.27669	4.44999	7.72668	2.91218	1.52	39.0983	0.82	1.205	0.36048	1.11259	1.19	18.9984	3.98	1.2	7.82109	1.3053	1.84	78.96	2.55	9.93	7.0535	2.0343	1.73	3.16	1.43	18.3801	2.33919	220
28.2725	24.8938	2.52851	0.234523	0.876708	2.02065	4.5	3.73726	2.65021	3.29572	4.2814	0.689959	1.2547	1.94466	0.943	19.1158	4.43641	3.27669	4.44999	7.72668	2.91218	1.52	39.0983	0.82	1.205	0.356171	1.11354	1.19	18.9984	3.98	1.2	7.82109	1.3053	1.84	78.96	2.55	9.93	7.0535	2.0343	1.73	3.16	1.43	18.3801	2.34624	240
28.2725	24.8938	2.52851	0.234523	0.876708	2.02065	5	3.78657	2.6564	3.28385	4.2814	0.669875	1.20718	1.87705	0.943	19.1158	4.43641	3.27669	4.44999	7.72668	2.91218	1.52	39.0983	0.82	1.205	0.368059	1.11259	1.19	18.9984	3.98	1.2	7.82109	1.3053	1.84	78.96	2.55	9.93	7.0535	2.0343	1.73	3.16	1.43	18.3801	2.34154	261.5
28.2725	24.8938	2.52851	0.234523	0.876708	2.02065	4.5	3.73279	2.65008	3.29565	4.2814	0.691337	1.08339	1.77472	0.943	19.1158	4.43641	3.27669	4.44999	7.72668	2.91218	1.52	39.0983	0.82	1.205	0.364143	1.11353	1.19	18.9984	3.98	1.2	7.82109	1.3053	1.84	78.96	2.55	9.93	7.0535	2.0343	1.73	3.16	1.43	18.3801	2.34604	196
28.2725	24.8938	2.52851	0.234523	0.876708	2.02065	5	3.78671	2.65626	3.28384	4.2814	0.675947	1.20048	1.87643	0.943	19.1158	4.43641	3.27669	4.44999	7.72668	2.91218	1.52	39.0983	0.82	1.205	0.369434	1.11258	1.19	18.9984	3.98	1.2	7.82109	1.3053	1.84	78.96	2.55	9.93	7.0535	2.0343	1.73	3.16	1.43	18.3801	2.34089	259
28.2725	24.8938	2.52851	0.234523	0.876708	2.02065	4.5	3.76105	2.64905	3.29552	4.2814	0.678638	1.0764	1.75504	0.943	19.1158	4.43641	3.27669	4.44999	7.72668	2.91218	1.52	39.0983	0.82	1.205	0.365125	1.11353	1.19	18.9984	3.98	1.2	7.82109	1.3053	1.84	78.96	2.55	9.93	7.0535	2.0343	1.73	3.16	1.43	18.3801	2.34794	187.5
28.2725	24.8938	2.52851	0.234523	0.876708	2.02065	4.5	3.76067	2.64905	3.29545	4.2814	0.675945	1.03946	1.7154	0.943	19.1158	4.43641	3.27669	4.44999	7.72668	2.91218	1.52	39.0983	0.82	1.205	0.371722	1.11353	1.19	18.9984	3.98	1.2	7.82109	1.3053	1.84	78.96	2.55	9.93	7.0535	2.0343	1.73	3.16	1.43	18.3801	2.34839	260
28.2725	24.8938	2.52851	0.234523	0.876708	2.02065	5	3.72645	2.65523	3.28364	4.2814	0.704593	1.0371	1.7417	0.943	19.1158	4.43641	3.27669	4.44999	7.72668	2.91218	1.52	39.0983	0.82	1.205	0.377013	1.11258	1.19	18.9984	3.98	1.2	7.82109	1.3053	1.84	78.96	2.55	9.93	7.0535	2.0343	1.73	3.16	1.43	18.3801	2.34324	231.5
42.3485	39.1972	2.16654	0.270126	0.786162	2.20366	4.5	4.26683	3.08538	3.60408	4.8568	0.529518	1.04637	1.57588	0.532	12.8668	3.84096	2.93404	4.92874	7.86278	3.96289	1.52	39.0983	0.82	1.045	0.490577	1.06761	1.7	32.065	2.58	8.36	6.90959	2.0212	2.06	126.904	2.66	6.66	7.47868	1.1927	1.76	1.84	0.08	33.2081	2.59987	222.5
42.3485	39.1972	2.16654	0.270126	0.786162	2.20366	4.5	4.45012	3.08552	3.60596	4.8568	0.443806	1.48195	1.92575	0.532	12.8668	3.84096	2.93404	4.92874	7.86278	3.96289	1.52	39.0983	0.82	1.045	0.494228	1.06789	1.7	32.065	2.58	8.36	6.90959	2.0212	2.06	126.904	2.66	6.66	7.47868	1.1927	1.76	1.84	0.08	33.2081	2.60172	262.5
42.3485	39.1972	2.16654	0.270126	0.786162	2.20366	4.5	4.45844	3.08567	3.6042	4.8568	0.434151	1.12178	1.55593	0.532	12.8668	3.84096	2.93404	4.92874	7.86278	3.96289	1.52	39.0983	0.82	1.045	0.574541	1.06762	1.7	32.065	2.58	8.36	6.90959	2.0212	2.06	126.904	2.66	6.66	7.47868	1.1927	1.76	1.84	0.08	33.2081	2.60167	363.5
42.3485	39.1972	2.16654	0.270126	0.786162	2.20366	4.5	4.28361	3.08455	3.6052	4.8568	0.525819	1.20712	1.73294	0.532	12.8668	3.84096	2.93404	4.92874	7.86278	3.96289	1.52	39.0983	0.82	1.045	0.484863	1.06774	1.7	32.065	2.58	8.36	6.90959	2.0212	2.06	126.904	2.66	6.66	7.47868	1.1927	1.76	1.84	0.08	33.2081	2.60132	213
42.3485	39.1972	2.16654	0.270126	0.786162	2.20366	5	4.34921	3.08626	3.61637	4.8568	0.494534	1.00028	1.49482	0.532	12.8668	3.84096	2.93404	4.92874	7.86278	3.96289	1.52	39.0983	0.82	1.045	0.55192	1.07837	1.7	32.065	2.58	8.36	6.90959	2.0212	2.06	126.904	2.66	6.66	7.47868	1.1927	1.76	1.84	0.08	33.2081	2.60452	271.5
42.3485	39.1972	2.16654	0.270126	0.786162	2.20366	4.5	4.46008	3.08497	3.60513	4.8568	0.431657	1.12211	1.55377	0.532	12.8668	3.84096	2.93404	4.92874	7.86278	3.96289	1.52	39.0983	0.82	1.045	0.498015	1.06761	1.7	32.065	2.58	8.36	6.90959	2.0212	2.06	126.904	2.66	6.66	7.47868	1.1927	1.76	1.84	0.08	33.2081	2.59797	365.5
42.3485	39.1972	2.16654	0.270126	0.786162	2.20366	5	4.3868	3.08529	3.6156	4.8568	0.475424	1.3533	1.82872	0.532	12.8668	3.84096	2.93404	4.92874	7.86278	3.96289	1.52	39.0983	0.82	1.045	0.542555	1.07822	1.7	32.065	2.58	8.36	6.90959	2.0212	2.06	126.904	2.66	6.66	7.47868	1.1927	1.76	1.84	0.08	33.2081	2.60412	219
42.3485	39.1972	2.16654	0.270126	0.786162	2.20366	4.5	4.28672	3.08511	3.60701	4.8568	0.524323	1.20887	1.7332	0.532	12.8668	3.84096	2.93404	4.92874	7.86278	3.96289	1.52	39.0983	0.82	1.045	0.501665	1.06789	1.7	32.065	2.58	8.36	6.90959	2.0212	2.06	126.904	2.66	6.66	7.47868	1.1927	1.76	1.84	0.08	33.2081	2.59982	215.5
42.3485	39.1972	2.16654	0.270126	0.786162	2.20366	5	4.38773	3.08655	3.61649	4.8568	0.47607	1.35428	1.83035	0.532	12.8668	3.84096	2.93404	4.92874	7.86278	3.96289	1.52	39.0983	0.82	1.045	0.565056	1.07838	1.7	32.065	2.58	8.36	6.90959	2.0212	2.06	126.904	2.66	6.66	7.47868	1.1927	1.76	1.84	0.08	33.2081	2.60632	217.5
42.3485	39.1972	2.16654	0.270126	0.786162	2.20366	4.5	4.26478	3.08526	3.60524	4.8568	0.529745	1.04702	1.57677	0.532	12.8668	3.84096	2.93404	4.92874	7.86278	3.96289	1.52	39.0983	0.82	1.045	0.511151	1.06762	1.7	32.065	2.58	8.36	6.90959	2.0212	2.06	126.904	2.66	6.66	7.47868	1.1927	1.76	1.84	0.08	33.2081	2.59977	220.5
42.3485	39.1972	2.16654	0.270126	0.786162	2.20366	4.5	4.4502	3.08415	3.60624	4.8568	0.441342	1.48036	1.92171	0.532	12.8668	3.84096	2.93404	4.92874	7.86278	3.96289	1.52	39.0983	0.82	1.045	0.4923	1.06774	1.7	32.065	2.58	8.36	6.90959	2.0212	2.06	126.904	2.66	6.66	7.47868	1.1927	1.76	1.84	0.08	33.2081	2.59942	261
42.3485	39.1972	2.16654	0.270126	0.786162	2.20366	5	4.34858	3.08558	3.61572	4.8568	0.493218	1.00167	1.49489	0.532	12.8668	3.84096	2.93404	4.92874	7.86278	3.96289	1.52	39.0983	0.82	1.045	0.55569	1.07823	1.7	32.065	2.58	8.36	6.90959	2.0212	2.06	126.904	2.66	6.66	7.47868	1.1927	1.76	1.84	0.08	33.2081	2.60592	256.5
39.2112	38.8567	1.9418	0.23377	0.733459	2.5598	4	4.2198	3.08364	3.36749	4.6742	0.548665	1.0328	1.58147	0.467	13.6482	3.93265	2.79539	3.78687	6.58226	3.50474	1.52	39.0983	0.82	1.045	0.473077	1.04857	1.7	32.065	2.58	8.36	6.9747	1.9528	1.82	79.904	2.96	4.54	7.62115	1.1937	1.76	2.14	0.38	51.4253	2.58782	213.5
39.2112	38.8567	1.9418	0.23377	0.733459	2.5598	4	4.54978	3.08459	3.36925	4.6742	0.394912	1.52871	1.92362	0.467	13.6482	3.93265	2.79539	3.78687	6.58226	3.50474	1.52	39.0983	0.82	1.045	0.438541	1.04821	1.7	32.065	2.58	8.36	6.9747	1.9528	1.82	79.904	2.96	4.54	7.62115	1.1937	1.76	2.14	0.38	51.4253	2.58712	252.5
39.2112	38.8567	1.9418	0.23377	0.733459	2.5598	4	4.55383	3.08625	3.368	4.6742	0.383318	1.21556	1.59888	0.467	13.6482	3.93265	2.79539	3.78687	6.58226	3.50474	1.52	39.0983	0.82	1.045	0.501116	1.04622	1.7	32.065	2.58	8.36	6.9747	1.9528	1.82	79.904	2.96	4.54	7.62115	1.1937	1.76	2.14	0.38	51.4253	2.58982	398.5
39.2112	38.8567	1.9418	0.23377	0.733459	2.5598	4	4.2112	3.0872	3.37191	4.6742	0.564148	1.33052	1.89467	0.467	13.6482	3.93265	2.79539	3.78687	6.58226	3.50474	1.52	39.0983	0.82	1.045	0.442626	1.04679	1.7	32.065	2.58	8.36	6.9747	1.9528	1.82	79.904	2.96	4.54	7.62115	1.1937	1.76	2.14	0.38	51.4253	2.59057	145
39.2112	38.8567	1.9418	0.23377	0.733459	2.5598	4	4.27409	3.0611	3.36416	4.6742	0.502764	0.974076	1.47684	0.467	13.6482	3.93265	2.79539	3.78687	6.58226	3.50474	1.52	39.0983	0.82	1.045	0.491866	1.05353	1.7	32.065	2.58	8.36	6.9747	1.9528	1.82	79.904	2.96	4.54	7.62115	1.1937	1.76	2.14	0.38	51.4253	2.59522	195.5
39.2112	38.8567	1.9418	0.23377	0.733459	2.5598	4	4.49731	3.08321	3.36681	4.6742	0.4158	1.16783	1.58363	0.467	13.6482	3.93265	2.79539	3.78687	6.58226	3.50474	1.52	39.0983	0.82	1.045	0.474633	1.04848	1.7	32.065	2.58	8.36	6.9747	1.9528	1.82	79.904	2.96	4.54	7.62115	1.1937	1.76	2.14	0.38	51.4253	2.58762	409
39.2112	38.8567	1.9418	0.23377	0.733459	2.5598	4	4.36572	3.06371	3.36682	4.6742	0.420386	1.50382	1.92421	0.467	13.6482	3.93265	2.79539	3.78687	6.58226	3.50474	1.52	39.0983	0.82	1.045	0.495951	1.05212	1.7	32.065	2.58	8.36	6.9747	1.9528	1.82	79.904	2.96	4.54	7.62115	1.1937	1.76	2.14	0.38	51.4253	2.59867	143.5
39.2112	38.8567	1.9418	0.23377	0.733459	2.5598	4	4.21868	3.08417	3.36856	4.6742	0.566989	1.29382	1.86081	0.467	13.6482	3.93265	2.79539	3.78687	6.58226	3.50474	1.52	39.0983	0.82	1.045	0.440097	1.04811	1.7	32.065	2.58	8.36	6.9747	1.9528	1.82	79.904	2.96	4.54	7.62115	1.1937	1.76	2.14	0.38	51.4253	2.58692	143
39.2112	38.8567	1.9418	0.23377	0.733459	2.5598	4	4.37709	3.06372	3.36467	4.6742	0.45534	1.39322	1.84856	0.467	13.6482	3.93265	2.79539	3.78687	6.58226	3.50474	1.52	39.0983	0.82	1.045	0.479223	1.05118	1.7	32.065	2.58	8.36	6.9747	1.9528	1.82	79.904	2.96	4.54	7.62115	1.1937	1.76	2.14	0.38	51.4253	2.59722	139.5
39.2112	38.8567	1.9418	0.23377	0.733459	2.5598	4	4.17981	3.08582	3.36731	4.6742	0.576277	0.973815	1.55009	0.467	13.6482	3.93265	2.79539	3.78687	6.58226	3.50474	1.52	39.0983	0.82	1.045	0.461991	1.04612	1.7	32.065	2.58	8.36	6.9747	1.9528	1.82	79.904	2.96	4.54	7.62115	1.1937	1.76	2.14	0.38	51.4253	2.58962	180
39.2112	38.8567	1.9418	0.23377	0.733459	2.5598	4	4.51301	3.08677	3.37122	4.6742	0.419677	1.53733	1.95701	0.467	13.6482	3.93265	2.79539	3.78687	6.58226	3.50474	1.52	39.0983	0.82	1.045	0.444182	1.0467	1.7	32.065	2.58	8.36	6.9747	1.9528	1.82	79.904	2.96	4.54	7.62115	1.1937	1.76	2.14	0.38	51.4253	2.59037	254.5
39.2112	38.8567	1.9418	0.23377	0.733459	2.5598	4	4.2682	3.06632	3.36732	4.6742	0.504052	0.91774	1.42179	0.467	13.6482	3.93265	2.79539	3.78687	6.58226	3.50474	1.52	39.0983	0.82	1.045	0.483308	1.04977	1.7	32.065	2.58	8.36	6.9747	1.9528	1.82	79.904	2.96	4.54	7.62115	1.1937	1.76	2.14	0.38	51.4253	2.60067	190.5
36.8329	38.4415	1.66638	0.217678	0.700519	2.59226	4	4.48862	3.0865	3.16937	4.3739	0.418846	1.44381	1.86265	0.834	13.9758	4.1443	2.73755	10.3231	13.0606	3.22502	1.52	39.0983	0.82	1.045	0.490577	1.04231	1.7	32.065	2.58	8.36	6.90959	1.9331	1.67	35.453	3.16	3.36	7.47868	1.1879	1.76	2.34	0.58	57.6978	2.5901	341.5
36.8329	38.4415	1.66638	0.217678	0.700519	2.59226	4	5.0185	3.08642	3.16954	4.3739	0.120473	1.41236	1.53283	0.834	13.9758	4.1443	2.73755	10.3231	13.0606	3.22502	1.52	39.0983	0.82	1.045	0.494228	1.04233	1.7	32.065	2.58	8.36	6.90959	1.9331	1.67	35.453	3.16	3.36	7.47868	1.1879	1.76	2.34	0.58	57.6978	2.5917	619
36.8329	38.4415	1.66638	0.217678	0.700519	2.59226	4	4.92631	3.08119	3.15705	4.3739	0.190867	1.30723	1.4981	0.834	13.9758	4.1443	2.73755	10.3231	13.0606	3.22502	1.52	39.0983	0.82	1.045	0.574541	1.03847	1.7	32.065	2.58	8.36	6.90959	1.9331	1.67	35.453	3.16	3.36	7.47868	1.1879	1.76	2.34	0.58	57.6978	2.5518	684.5
36.8329	38.4415	1.66638	0.217678	0.700519	2.59226	4	4.14056	3.08111	3.15709	4.3739	0.581929	1.42293	2.00486	0.834	13.9758	4.1443	2.73755	10.3231	13.0606	3.22502	1.52	39.0983	0.82	1.045	0.484863	1.03853	1.7	32.065	2.58	8.36	6.90959	1.9331	1.67	35.453	3.16	3.36	7.47868	1.1879	1.76	2.34	0.58	57.6978	2.55195	39
36.8329	38.4415	1.66638	0.217678	0.700519	2.59226	4	4.37815	3.09087	3.17791	4.3739	0.501365	1.41708	1.91845	0.834	13.9758	4.1443	2.73755	10.3231	13.0606	3.22502	1.52	39.0983	0.82	1.045	0.55192	1.04417	1.7	32.065	2.58	8.36	6.90959	1.9331	1.67	35.453	3.16	3.36	7.47868	1.1879	1.76	2.34	0.58	57.6978	2.60535	183
36.8329	38.4415	1.66638	0.217678	0.700519	2.59226	4	4.16394	3.0865	3.16949	4.3739	0.634343	0.801667	1.43601	0.834	13.9758	4.1443	2.73755	10.3231	13.0606	3.22502	1.52	39.0983	0.82	1.045	0.498015	1.04228	1.7	32.065	2.58	8.36	6.90959	1.9331	1.67	35.453	3.16	3.36	7.47868	1.1879	1.76	2.34	0.58	57.6978	2.59105	394.5
36.8329	38.4415	1.66638	0.217678	0.700519	2.59226	4	4.01451	3.08557	3.16547	4.3739	0.205282	1.43789	1.64317	0.834	13.9758	4.1443	2.73755	10.3231	13.0606	3.22502	1.52	39.0983	0.82	1.045	0.542555	1.04038	1.7	32.065	2.58	8.36	6.90959	1.9331	1.67	35.453	3.16	3.36	7.47868	1.1879	1.76	2.34	0.58	57.6978	2.5656	497
36.8329	38.4415	1.66638	0.217678	0.700519	2.59226	4	4.09637	3.08642	3.16967	4.3739	0.682223	0.880219	1.56244	0.834	13.9758	4.1443	2.73755	10.3231	13.0606	3.22502	1.52	39.0983	0.82	1.045	0.501665	1.0423	1.7	32.065	2.58	8.36	6.90959	1.9331	1.67	35.453	3.16	3.36	7.47868	1.1879	1.76	2.34	0.58	57.6978	2.59265	238.5
36.8329	38.4415	1.66638	0.217678	0.700519	2.59226	4	4.01464	3.08557	3.1656	4.3739	0.692891	0.915519	1.60841	0.834	13.9758	4.1443	2.73755	10.3231	13.0606	3.22502	1.52	39.0983	0.82	1.045	0.565056	1.04034	1.7	32.065	2.58	8.36	6.90959	1.9331	1.67	35.453	3.16	3.36	7.47868	1.1879	1.76	2.34	0.58	57.6978	2.56705	106.5
36.8329	38.4415	1.66638	0.217678	0.700519	2.59226	4	4.01829	3.0812	3.15718	4.3739	0.72204	0.871645	1.59369	0.834	13.9758	4.1443	2.73755	10.3231	13.0606	3.22502	1.52	39.0983	0.82	1.045	0.511151	1.03844	1.7	32.065	2.58	8.36	6.90959	1.9331	1.67	35.453	3.16	3.36	7.47868	1.1879	1.76	2.34	0.58	57.6978	2.55275	219
36.8329	38.4415	1.66638	0.217678	0.700519	2.59226	4	4.30798	3.08112	3.15722	4.3739	0.560572	1.37589	1.93646	0.834	13.9758	4.1443	2.73755	10.3231	13.0606	3.22502	1.52	39.0983	0.82	1.045	0.4923	1.0385	1.7	32.065	2.58	8.36	6.90959	1.9331	1.67	35.453	3.16	3.36	7.47868	1.1879	1.76	2.34	0.58	57.6978	2.5529	86.5
36.8329	38.4415	1.66638	0.217678	0.700519	2.59226	4	4.13002	3.08026	3.15315	4.3739	0.617542	0.77106	1.3886	0.834	13.9758	4.1443	2.73755	10.3231	13.0606	3.22502	1.52	39.0983	0.82	1.045	0.55569	1.03654	1.7	32.065	2.58	8.36	6.90959	1.9331	1.67	35.453	3.16	3.36	7.47868	1.1879	1.76	2.34	0.58	57.6978	2.5273	427
27.2999	25.4796	2.04811	0.202479	0.840179	2.54724	4.5	3.75992	2.65087	3.12812	4.1367	0.714593	1.02236	1.73695	1.165	20.6852	4.69388	2.97665	5.73442	8.71107	2.5886	1.52	39.0983	0.82	1.045	0.331232	1.08785	1.19	18.9984	3.98	1.2	7.86249	1.26	1.7	32.065	2.58	8.36	7.14235	2.0066	1.76	3.16	1.4	27.3249	2.55636	213.5
27.2999	25.4796	2.04811	0.202479	0.840179	2.54724	4.5	3.80976	2.65087	3.12812	4.1367	0.653421	1.01483	1.66826	1.165	20.6852	4.69388	2.97665	5.73442	8.71107	2.5886	1.52	39.0983	0.82	1.045	0.329178	1.08793	1.19	18.9984	3.98	1.2	7.86249	1.26	1.7	32.065	2.58	8.36	7.14235	2.0066	1.76	3.16	1.4	27.3249	2.55631	389.5
27.2999	25.4796	2.04811	0.202479	0.840179	2.54724	4.5	3.81144	2.65099	3.12807	4.1367	0.688749	1.39699	2.08573	1.165	20.6852	4.69388	2.97665	5.73442	8.71107	2.5886	1.52	39.0983	0.82	1.045	0.333307	1.0878	1.19	18.9984	3.98	1.2	7.86249	1.26	1.7	32.065	2.58	8.36	7.14235	2.0066	1.76	3.16	1.4	27.3249	2.55576	236
27.2999	25.4796	2.04811	0.202479	0.840179	2.54724	4.5	3.6878	2.65099	3.12807	4.1367	0.714561	0.992958	1.70752	1.165	20.6852	4.69388	2.97665	5.73442	8.71107	2.5886	1.52	39.0983	0.82	1.045	0.331884	1.08781	1.19	18.9984	3.98	1.2	7.86249	1.26	1.7	32.065	2.58	8.36	7.14235	2.0066	1.76	3.16	1.4	27.3249	2.55581	184
27.2999	25.4796	2.04811	0.202479	0.840179	2.54724	5	3.85584	2.67028	3.13099	4.1367	0.694296	0.937662	1.63196	1.165	20.6852	4.69388	2.97665	5.73442	8.71107	2.5886	1.52	39.0983	0.82	1.045	0.308141	1.0911	1.19	18.9984	3.98	1.2	7.86249	1.26	1.7	32.065	2.58	8.36	7.14235	2.0066	1.76	3.16	1.4	27.3249	2.54596	337
27.2999	25.4796	2.04811	0.202479	0.840179	2.54724	4.5	3.81136	2.65087	3.12812	4.1367	0.6893	1.39708	2.08638	1.165	20.6852	4.69388	2.97665	5.73442	8.71107	2.5886	1.52	39.0983	0.82	1.045	0.333291	1.08778	1.19	18.9984	3.98	1.2	7.86249	1.26	1.7	32.065	2.58	8.36	7.14235	2.0066	1.76	3.16	1.4	27.3249	2.55471	234
27.2999	25.4796	2.04811	0.202479	0.840179	2.54724	5	3.7687	2.6704	3.13095	4.1367	0.737511	1.20771	1.94522	1.165	20.6852	4.69388	2.97665	5.73442	8.71107	2.5886	1.52	39.0983	0.82	1.045	0.310847	1.09099	1.19	18.9984	3.98	1.2	7.86249	1.26	1.7	32.065	2.58	8.36	7.14235	2.0066	1.76	3.16	1.4	27.3249	2.54546	230.5
27.2999	25.4796	2.04811	0.202479	0.840179	2.54724	4.5	3.68775	2.65087	3.12812	4.1367	0.714828	0.992287	1.70711	1.165	20.6852	4.69388	2.97665	5.73442	8.71107	2.5886	1.52	39.0983	0.82	1.045	0.331237	1.08786	1.19	18.9984	3.98	1.2	7.86249	1.26	1.7	32.065	2.58	8.36	7.14235	2.0066	1.76	3.16	1.4	27.3249	2.55466	181.5
27.2999	25.4796	2.04811	0.202479	0.840179	2.54724	5	3.7687	2.6704	3.13095	4.1367	0.737755	1.20658	1.94433	1.165	20.6852	4.69388	2.97665	5.73442	8.71107	2.5886	1.52	39.0983	0.82	1.045	0.310215	1.09106	1.19	18.9984	3.98	1.2	7.86249	1.26	1.7	32.065	2.58	8.36	7.14235	2.0066	1.76	3.16	1.4	27.3249	2.54536	230
27.2999	25.4796	2.04811	0.202479	0.840179	2.54724	4.5	3.7604	2.65098	3.12807	4.1367	0.714662	1.02157	1.73623	1.165	20.6852	4.69388	2.97665	5.73442	8.71107	2.5886	1.52	39.0983	0.82	1.045	0.335365	1.08774	1.19	18.9984	3.98	1.2	7.86249	1.26	1.7	32.065	2.58	8.36	7.14235	2.0066	1.76	3.16	1.4	27.3249	2.55411	214
27.2999	25.4796	2.04811	0.202479	0.840179	2.54724	4.5	3.80982	2.65098	3.12807	4.1367	0.653964	1.01415	1.66812	1.165	20.6852	4.69388	2.97665	5.73442	8.71107	2.5886	1.52	39.0983	0.82	1.045	0.333943	1.08774	1.19	18.9984	3.98	1.2	7.86249	1.26	1.7	32.065	2.58	8.36	7.14235	2.0066	1.76	3.16	1.4	27.3249	2.55416	394
27.2999	25.4796	2.04811	0.202479	0.840179	2.54724	5	3.85607	2.67051	3.1309	4.1367	0.694245	0.938221	1.63247	1.165	20.6852	4.69388	2.97665	5.73442	8.71107	2.5886	1.52	39.0983	0.82	1.045	0.312922	1.09095	1.19	18.9984	3.98	1.2	7.86249	1.26	1.7	32.065	2.58	8.36	7.14235	2.0066	1.76	3.16	1.4	27.3249	2.54486	338
31.0374	25.8645	2.78419	0.289952	0.910591	2.0488	6	3.79988	2.68692	3.79988	4.65389	0.639943	1.2308	1.87074	1.4	18.7209	3.13016	3.2172	5.33834	8.55554	3.14894	1.52	39.0983	0.82	1.055	8.24665	1.13855	1.26	15.9994	3.44	3.06	7.44708	2.24356	2.06	126.904	2.66	6.66	7.81285	1.17209	2.62	1.84	0.78	-38.0032	1.55672	355
29.272	24.3933	2.41886	0.229787	0.849546	2.56837	6	3.72642	2.63498	3.72642	4.56392	0.603212	1.40718	2.01039	1.102	19.6892	3.21435	2.94478	6.53049	9.47527	2.74845	1.52	39.0983	0.82	1.055	8.23657	1.13868	1.26	15.9994	3.44	3.06	7.43829	2.18597	1.82	79.904	2.96	4.54	7.85114	1.23008	2.62	2.14	0.48	-17.1245	1.42136	203
27.9179	25.0345	2.0074	0.199788	0.811392	2.61933	4.5	3.7136	2.65365	3.21765	4.2632	0.641569	1.22424	1.86581	0.804	20.6125	3.14007	2.77937	14.5526	17.332	2.48136	1.52	39.0983	0.82	1.055	0.341089	1.09075	1.26	15.9994	3.44	3.06	7.28411	2.0768	1.67	35.453	3.16	3.36	7.71291	1.1967	2.62	2.34	0.28	-1.74259	1.68243	210.5
27.9179	25.0345	2.0074	0.199788	0.811392	2.61933	4.5	3.69856	2.65559	3.21127	4.2632	0.645857	1.15191	1.79777	0.804	20.6125	3.14007	2.77937	14.5526	17.332	2.48136	1.52	39.0983	0.82	1.055	0.33658	1.09019	1.26	15.9994	3.44	3.06	7.28411	2.0768	1.67	35.453	3.16	3.36	7.71291	1.1967	2.62	2.34	0.28	-1.74259	1.68368	212.5
27.9179	25.0345	2.0074	0.199788	0.811392	2.61933	4.5	3.80386	2.65384	3.21639	4.2632	0.59599	1.42436	2.02035	0.804	20.6125	3.14007	2.77937	14.5526	17.332	2.48136	1.52	39.0983	0.82	1.055	0.33711	1.09073	1.26	15.9994	3.44	3.06	7.28411	2.0768	1.67	35.453	3.16	3.36	7.71291	1.1967	2.62	2.34	0.28	-1.74259	1.68238	253
27.9179	25.0345	2.0074	0.199788	0.811392	2.61933	4.5	3.81317	2.65554	3.21117	4.2632	0.588458	1.15933	1.74779	0.804	20.6125	3.14007	2.77937	14.5526	17.332	2.48136	1.52	39.0983	0.82	1.055	0.332346	1.09015	1.26	15.9994	3.44	3.06	7.28411	2.0768	1.67	35.453	3.16	3.36	7.71291	1.1967	2.62	2.34	0.28	-1.74259	1.68403	317.5
27.9179	25.0345	2.0074	0.199788	0.811392	2.61933	5	3.77748	2.65854	3.21896	4.2632	0.616813	1.33248	1.9493	0.804	20.6125	3.14007	2.77937	14.5526	17.332	2.48136	1.52	39.0983	0.82	1.055	0.326577	1.09364	1.26	15.9994	3.44	3.06	7.28411	2.0768	1.67	35.453	3.16	3.36	7.71291	1.1967	2.62	2.34	0.28	-1.74259	1.68243	231.5
27.9179	25.0345	2.0074	0.199788	0.811392	2.61933	4.5	3.80148	2.65353	3.21803	4.2632	0.597672	1.42692	2.02459	0.804	20.6125	3.14007	2.77937	14.5526	17.332	2.48136	1.52	39.0983	0.82	1.055	0.342342	1.09081	1.26	15.9994	3.44	3.06	7.28411	2.0768	1.67	35.453	3.16	3.36	7.71291	1.1967	2.62	2.34	0.28	-1.74259	1.68283	254.5
27.9179	25.0345	2.0074	0.199788	0.811392	2.61933	5	3.74627	2.65849	3.21885	4.2632	0.6287	1.09777	1.72647	0.804	20.6125	3.14007	2.77937	14.5526	17.332	2.48136	1.52	39.0983	0.82	1.055	0.322344	1.0936	1.26	15.9994	3.44	3.06	7.28411	2.0768	1.67	35.453	3.16	3.36	7.71291	1.1967	2.62	2.34	0.28	-1.74259	1.68278	236
27.9179	25.0345	2.0074	0.199788	0.811392	2.61933	4.5	3.81175	2.65547	3.21166	4.2632	0.589284	1.15889	1.74817	0.804	20.6125	3.14007	2.77937	14.5526	17.332	2.48136	1.52	39.0983	0.82	1.055	0.337834	1.09025	1.26	15.9994	3.44	3.06	7.28411	2.0768	1.67	35.453	3.16	3.36	7.71291	1.1967	2.62	2.34	0.28	-1.74259	1.68408	317.5
27.9179	25.0345	2.0074	0.199788	0.811392	2.61933	5	3.74704	2.65873	3.2177	4.2632	0.628702	1.09864	1.72734	0.804	20.6125	3.14007	2.77937	14.5526	17.332	2.48136	1.52	39.0983	0.82	1.055	0.329589	1.09362	1.26	15.9994	3.44	3.06	7.28411	2.0768	1.67	35.453	3.16	3.36	7.71291	1.1967	2.62	2.34	0.28	-1.74259	1.68238	236.5
27.9179	25.0345	2.0074	0.199788	0.811392	2.61933	4.5	3.71383	2.65371	3.21678	4.2632	0.64105	1.22597	1.86702	0.804	20.6125	3.14007	2.77937	14.5526	17.332	2.48136	1.52	39.0983	0.82	1.055	0.345355	1.09079	1.26	15.9994	3.44	3.06	7.28411	2.0768	1.67	35.453	3.16	3.36	7.71291	1.1967	2.62	2.34	0.28	-1.74259	1.68278	208
27.9179	25.0345	2.0074	0.199788	0.811392	2.61933	4.5	3.69698	2.65542	3.21156	4.2632	0.646574	1.15224	1.79881	0.804	20.6125	3.14007	2.77937	14.5526	17.332	2.48136	1.52	39.0983	0.82	1.055	0.3336	1.09021	1.26	15.9994	3.44	3.06	7.28411	2.0768	1.67	35.453	3.16	3.36	7.71291	1.1967	2.62	2.34	0.28	-1.74259	1.68443	209.5
27.9179	25.0345	2.0074	0.199788	0.811392	2.61933	5	3.77734	2.65868	3.2176	4.2632	0.616372	1.33437	1.95074	0.804	20.6125	3.14007	2.77937	14.5526	17.332	2.48136	1.52	39.0983	0.82	1.055	0.325356	1.09358	1.26	15.9994	3.44	3.06	7.28411	2.0768	1.67	35.453	3.16	3.36	7.71291	1.1967	2.62	2.34	0.28	-1.74259	1.68273	231.5
22.9977	24.4096	2.19925	0.134256	0.689302	2.66809	4	3.84707	2.64056	2.6872	3.7174	0.549	1.43587	1.98487	1.227	24	3.60605	2.74857	5.95591	8.70448	2.0217	1.52	39.0983	0.82	1.055	0.267582	1.05861	1.26	15.9994	3.44	3.06	7.25898	1.9799	1.19	18.9984	3.98	1.2	7.83786	1.1951	2.62	3.16	0.54	30.1244	1.80987	390
22.9977	24.4096	2.19925	0.134256	0.689302	2.66809	4	4.3639	2.64055	2.68719	3.7174	0.26963	1.38811	1.65774	1.227	24	3.60605	2.74857	5.95591	8.70448	2.0217	1.52	39.0983	0.82	1.055	0.262885	1.05859	1.26	15.9994	3.44	3.06	7.25898	1.9799	1.19	18.9984	3.98	1.2	7.83786	1.1951	2.62	3.16	0.54	30.1244	1.81442	814
22.9977	24.4096	2.19925	0.134256	0.689302	2.66809	4	4.27873	2.63041	2.67622	3.7174	0.337015	1.29053	1.62754	1.227	24	3.60605	2.74857	5.95591	8.70448	2.0217	1.52	39.0983	0.82	1.055	0.357576	1.05772	1.26	15.9994	3.44	3.06	7.25898	1.9799	1.19	18.9984	3.98	1.2	7.83786	1.1951	2.62	3.16	0.54	30.1244	1.75607	821.5
22.9977	24.4096	2.19925	0.134256	0.689302	2.66809	4	3.52276	2.63041	2.67622	3.7174	0.693611	1.43356	2.12717	1.227	24	3.60605	2.74857	5.95591	8.70448	2.0217	1.52	39.0983	0.82	1.055	0.311692	1.05737	1.26	15.9994	3.44	3.06	7.25898	1.9799	1.19	18.9984	3.98	1.2	7.83786	1.1951	2.62	3.16	0.54	30.1244	1.75607	67
22.9977	24.4096	2.19925	0.134256	0.689302	2.66809	4	3.76379	2.64992	2.70089	3.7174	0.639753	1.45284	2.09259	1.227	24	3.60605	2.74857	5.95591	8.70448	2.0217	1.52	39.0983	0.82	1.055	0.269053	1.06001	1.26	15.9994	3.44	3.06	7.25898	1.9799	1.19	18.9984	3.98	1.2	7.83786	1.1951	2.62	3.16	0.54	30.1244	1.82102	201
22.9977	24.4096	2.19925	0.134256	0.689302	2.66809	4	3.58254	2.64057	2.6872	3.7174	0.769205	0.865643	1.63485	1.227	24	3.60605	2.74857	5.95591	8.70448	2.0217	1.52	39.0983	0.82	1.055	0.260734	1.05856	1.26	15.9994	3.44	3.06	7.25898	1.9799	1.19	18.9984	3.98	1.2	7.83786	1.1951	2.62	3.16	0.54	30.1244	1.81052	398.5
22.9977	24.4096	2.19925	0.134256	0.689302	2.66809	4	3.44402	2.63977	2.68992	3.7174	0.357388	1.4516	1.80899	1.227	24	3.60605	2.74857	5.95591	8.70448	2.0217	1.52	39.0983	0.82	1.055	0.31786	1.05879	1.26	15.9994	3.44	3.06	7.25898	1.9799	1.19	18.9984	3.98	1.2	7.83786	1.1951	2.62	3.16	0.54	30.1244	1.76267	614.5
22.9977	24.4096	2.19925	0.134256	0.689302	2.66809	4	3.56036	2.64057	2.68719	3.7174	0.811702	0.941526	1.75323	1.227	24	3.60605	2.74857	5.95591	8.70448	2.0217	1.52	39.0983	0.82	1.055	0.256037	1.05855	1.26	15.9994	3.44	3.06	7.25898	1.9799	1.19	18.9984	3.98	1.2	7.83786	1.1951	2.62	3.16	0.54	30.1244	1.81507	291.5
22.9977	24.4096	2.19925	0.134256	0.689302	2.66809	4	3.44404	2.63977	2.68992	3.7174	0.824081	0.955223	1.7793	1.227	24	3.60605	2.74857	5.95591	8.70448	2.0217	1.52	39.0983	0.82	1.055	0.310966	1.05913	1.26	15.9994	3.44	3.06	7.25898	1.9799	1.19	18.9984	3.98	1.2	7.83786	1.1951	2.62	3.16	0.54	30.1244	1.76722	149.5
22.9977	24.4096	2.19925	0.134256	0.689302	2.66809	4	3.46411	2.63043	2.67622	3.7174	0.858705	0.942103	1.80081	1.227	24	3.60605	2.74857	5.95591	8.70448	2.0217	1.52	39.0983	0.82	1.055	0.302646	1.05768	1.26	15.9994	3.44	3.06	7.25898	1.9799	1.19	18.9984	3.98	1.2	7.83786	1.1951	2.62	3.16	0.54	30.1244	1.75672	232.5
22.9977	24.4096	2.19925	0.134256	0.689302	2.66809	4	3.68042	2.63043	2.67622	3.7174	0.710808	1.35826	2.06907	1.227	24	3.60605	2.74857	5.95591	8.70448	2.0217	1.52	39.0983	0.82	1.055	0.304843	1.05733	1.26	15.9994	3.44	3.06	7.25898	1.9799	1.19	18.9984	3.98	1.2	7.83786	1.1951	2.62	3.16	0.54	30.1244	1.75672	96
22.9977	24.4096	2.19925	0.134256	0.689302	2.66809	4	3.54153	2.62963	2.67894	3.7174	0.736583	0.848143	1.58473	1.227	24	3.60605	2.74857	5.95591	8.70448	2.0217	1.52	39.0983	0.82	1.055	0.359773	1.0579	1.26	15.9994	3.44	3.06	7.25898	1.9799	1.19	18.9984	3.98	1.2	7.83786	1.1951	2.62	3.16	0.54	30.1244	1.70887	483
32.0397	29.796	2.8488	0.391463	0.758961	1.89948	4	3.84615	2.8235	3.22952	4.5049	0.230677	0.80232	1.033	0.634	17.5752	4.38934	3.46124	10.5374	13.9986	3.44716	1.16	22.9897	0.93	0.2335	0.20518	1.04473	1.84	78.96	2.55	8.84	7.49995	1.8361	2.06	126.904	2.66	6.35	7.88416	1.2982	1.62	1.73	0.11	41.3774	3.02649	215
32.0397	29.796	2.8488	0.391463	0.758961	1.89948	4	4.07703	2.82259	3.22802	4.5049	0.113247	1.082	1.19525	0.634	17.5752	4.38934	3.46124	10.5374	13.9986	3.44716	1.16	22.9897	0.93	0.2335	0.205317	1.04458	1.84	78.96	2.55	8.84	7.49995	1.8361	2.06	126.904	2.66	6.35	7.88416	1.2982	1.62	1.73	0.11	41.3774	3.0268	242
32.0397	29.796	2.8488	0.391463	0.758961	1.89948	4	4.14258	2.82363	3.2307	4.5049	0.0832468	0.851115	0.934362	0.634	17.5752	4.38934	3.46124	10.5374	13.9986	3.44716	1.16	22.9897	0.93	0.2335	0.20512	1.04488	1.84	78.96	2.55	8.84	7.49995	1.8361	2.06	126.904	2.66	6.35	7.88416	1.2982	1.62	1.73	0.11	41.3774	3.02585	312
32.0397	29.796	2.8488	0.391463	0.758961	1.89948	4	3.91375	2.82284	3.23009	4.5049	0.195375	1.03154	1.22691	0.634	17.5752	4.38934	3.46124	10.5374	13.9986	3.44716	1.16	22.9897	0.93	0.2335	0.205485	1.04452	1.84	78.96	2.55	8.84	7.49995	1.8361	2.06	126.904	2.66	6.35	7.88416	1.2982	1.62	1.73	0.11	41.3774	3.02607	195
32.0397	29.796	2.8488	0.391463	0.758961	1.89948	4	3.92005	2.80992	3.23631	4.5049	0.175923	0.698144	0.874066	0.634	17.5752	4.38934	3.46124	10.5374	13.9986	3.44716	1.16	22.9897	0.93	0.2335	0.204894	1.04475	1.84	78.96	2.55	8.84	7.49995	1.8361	2.06	126.904	2.66	6.35	7.88416	1.2982	1.62	1.73	0.11	41.3774	3.03898	230
32.0397	29.796	2.8488	0.391463	0.758961	1.89948	4	4.13804	2.82388	3.23116	4.5049	0.0844203	0.855952	0.940372	0.634	17.5752	4.38934	3.46124	10.5374	13.9986	3.44716	1.16	22.9897	0.93	0.2335	0.205114	1.0451	1.84	78.96	2.55	8.84	7.49995	1.8361	2.06	126.904	2.66	6.35	7.88416	1.2982	1.62	1.73	0.11	41.3774	3.02675	312
32.0397	29.796	2.8488	0.391463	0.758961	1.89948	4	4.04428	2.81017	3.23838	4.5049	0.113974	1.09156	1.20553	0.634	17.5752	4.38934	3.46124	10.5374	13.9986	3.44716	1.16	22.9897	0.93	0.2335	0.205061	1.04469	1.84	78.96	2.55	8.84	7.49995	1.8361	2.06	126.904	2.66	6.35	7.88416	1.2982	1.62	1.73	0.11	41.3774	3.03825	205
32.0397	29.796	2.8488	0.391463	0.758961	1.89948	4	3.9078	2.82297	3.22966	4.5049	0.197457	1.02258	1.22004	0.634	17.5752	4.38934	3.46124	10.5374	13.9986	3.44716	1.16	22.9897	0.93	0.2335	0.205252	1.04495	1.84	78.96	2.55	8.84	7.49995	1.8361	2.06	126.904	2.66	6.35	7.88416	1.2982	1.62	1.73	0.11	41.3774	3.02706	195
32.0397	29.796	2.8488	0.391463	0.758961	1.89948	4	4.03088	2.81005	3.23749	4.5049	0.121319	1.07858	1.1999	0.634	17.5752	4.38934	3.46124	10.5374	13.9986	3.44716	1.16	22.9897	0.93	0.2335	0.205075	1.0449	1.84	78.96	2.55	8.84	7.49995	1.8361	2.06	126.904	2.66	6.35	7.88416	1.2982	1.62	1.73	0.11	41.3774	3.03834	205
32.0397	29.796	2.8488	0.391463	0.758961	1.89948	4	3.84942	2.82401	3.23235	4.5049	0.229503	0.796175	1.02568	0.634	17.5752	4.38934	3.46124	10.5374	13.9986	3.44716	1.16	22.9897	0.93	0.2335	0.205296	1.04525	1.84	78.96	2.55	8.84	7.49995	1.8361	2.06	126.904	2.66	6.35	7.88416	1.2982	1.62	1.73	0.11	41.3774	3.02612	215
32.0397	29.796	2.8488	0.391463	0.758961	1.89948	4	4.06906	2.82322	3.23173	4.5049	0.117322	1.08758	1.2049	0.634	17.5752	4.38934	3.46124	10.5374	13.9986	3.44716	1.16	22.9897	0.93	0.2335	0.205419	1.04488	1.84	78.96	2.55	8.84	7.49995	1.8361	2.06	126.904	2.66	6.35	7.88416	1.2982	1.62	1.73	0.11	41.3774	3.02633	245
32.0397	29.796	2.8488	0.391463	0.758961	1.89948	4	3.91055	2.8103	3.23957	4.5049	0.181656	0.69036	0.872016	0.634	17.5752	4.38934	3.46124	10.5374	13.9986	3.44716	1.16	22.9897	0.93	0.2335	0.205243	1.04484	1.84	78.96	2.55	8.84	7.49995	1.8361	2.06	126.904	2.66	6.35	7.88416	1.2982	1.62	1.73	0.11	41.3774	3.03761	231
29.2969	29.458	2.5827	0.350525	0.702393	1.87455	4	4.08559	2.82047	2.9649	4.1755	0.104721	1.10412	1.20884	0.82	18.2712	4.41498	3.24225	4.75969	8.00194	2.99158	1.16	22.9897	0.93	0.2335	0.203374	1.01725	1.84	78.96	2.55	8.84	7.50219	1.78	1.82	79.904	2.96	4.28	7.88336	1.2565	1.62	2.03	0.41	60.1627	3.00135	198.5
29.2969	29.458	2.5827	0.350525	0.702393	1.87455	4	4.48022	2.82099	2.96544	4.1755	-0.109824	1.03516	0.925339	0.82	18.2712	4.41498	3.24225	4.75969	8.00194	2.99158	1.16	22.9897	0.93	0.2335	0.203485	1.01693	1.84	78.96	2.55	8.84	7.50219	1.78	1.82	79.904	2.96	4.28	7.88336	1.2565	1.62	2.03	0.41	60.1627	3.00132	370
29.2969	29.458	2.5827	0.350525	0.702393	1.87455	4	4.43253	2.81724	2.95563	4.1755	-0.073703	0.952801	0.879098	0.82	18.2712	4.41498	3.24225	4.75969	8.00194	2.99158	1.16	22.9897	0.93	0.2335	0.207558	1.00817	1.84	78.96	2.55	8.84	7.50219	1.78	1.82	79.904	2.96	4.28	7.88336	1.2565	1.62	2.03	0.41	60.1627	2.9829	456.5
29.2969	29.458	2.5827	0.350525	0.702393	1.87455	4	3.84913	2.81666	2.9557	4.1755	0.216678	1.14693	1.36361	0.82	18.2712	4.41498	3.24225	4.75969	8.00194	2.99158	1.16	22.9897	0.93	0.2335	0.20579	1.00792	1.84	78.96	2.55	8.84	7.50219	1.78	1.82	79.904	2.96	4.28	7.88336	1.2565	1.62	2.03	0.41	60.1627	2.9831	72.5
29.2969	29.458	2.5827	0.350525	0.702393	1.87455	4	3.99378	2.82308	2.96341	4.1755	0.169324	1.03761	1.20694	0.82	18.2712	4.41498	3.24225	4.75969	8.00194	2.99158	1.16	22.9897	0.93	0.2335	0.20289	1.01988	1.84	78.96	2.55	8.84	7.50219	1.78	1.82	79.904	2.96	4.28	7.88336	1.2565	1.62	2.03	0.41	60.1627	2.99684	167
29.2969	29.458	2.5827	0.350525	0.702393	1.87455	4	3.83385	2.82109	2.96476	4.1755	0.263245	0.582668	0.845913	0.82	18.2712	4.41498	3.24225	4.75969	8.00194	2.99158	1.16	22.9897	0.93	0.2335	0.203313	1.01766	1.84	78.96	2.55	8.84	7.50219	1.78	1.82	79.904	2.96	4.28	7.88336	1.2565	1.62	2.03	0.41	60.1627	3.00124	336.5
29.2969	29.458	2.5827	0.350525	0.702393	1.87455	4	4.40755	2.81874	2.95367	4.1755	-0.0825441	1.07256	0.990017	0.82	18.2712	4.41498	3.24225	4.75969	8.00194	2.99158	1.16	22.9897	0.93	0.2335	0.205196	1.01087	1.84	78.96	2.55	8.84	7.50219	1.78	1.82	79.904	2.96	4.28	7.88336	1.2565	1.62	2.03	0.41	60.1627	2.97862	326.5
29.2969	29.458	2.5827	0.350525	0.702393	1.87455	4	3.74438	2.82161	2.96531	4.1755	0.316906	0.69597	1.01288	0.82	18.2712	4.41498	3.24225	4.75969	8.00194	2.99158	1.16	22.9897	0.93	0.2335	0.203424	1.01734	1.84	78.96	2.55	8.84	7.50219	1.78	1.82	79.904	2.96	4.28	7.88336	1.2565	1.62	2.03	0.41	60.1627	3.00121	228
29.2969	29.458	2.5827	0.350525	0.702393	1.87455	4	3.69294	2.81985	2.95415	4.1755	0.326203	0.738438	1.06464	0.82	18.2712	4.41498	3.24225	4.75969	8.00194	2.99158	1.16	22.9897	0.93	0.2335	0.20528	1.0108	1.84	78.96	2.55	8.84	7.50219	1.78	1.82	79.904	2.96	4.28	7.88336	1.2565	1.62	2.03	0.41	60.1627	2.97839	142
29.2969	29.458	2.5827	0.350525	0.702393	1.87455	4	3.68963	2.81786	2.9555	4.1755	0.344755	0.6867	1.03145	0.82	18.2712	4.41498	3.24225	4.75969	8.00194	2.99158	1.16	22.9897	0.93	0.2335	0.205702	1.00859	1.84	78.96	2.55	8.84	7.50219	1.78	1.82	79.904	2.96	4.28	7.88336	1.2565	1.62	2.03	0.41	60.1627	2.98279	194.5
29.2969	29.458	2.5827	0.350525	0.702393	1.87455	4	3.94782	2.81728	2.95557	4.1755	0.204284	1.10672	1.31101	0.82	18.2712	4.41498	3.24225	4.75969	8.00194	2.99158	1.16	22.9897	0.93	0.2335	0.205729	1.00833	1.84	78.96	2.55	8.84	7.50219	1.78	1.82	79.904	2.96	4.28	7.88336	1.2565	1.62	2.03	0.41	60.1627	2.98299	124.5
29.2969	29.458	2.5827	0.350525	0.702393	1.87455	4	3.79699	2.81552	2.94441	4.1755	0.261826	0.547457	0.809283	0.82	18.2712	4.41498	3.24225	4.75969	8.00194	2.99158	1.16	22.9897	0.93	0.2335	0.207585	1.0018	1.84	78.96	2.55	8.84	7.50219	1.78	1.82	79.904	2.96	4.28	7.88336	1.2565	1.62	2.03	0.41	60.1627	2.96017	262
26.8295	28.928	2.26998	0.339948	0.667037	1.82075	4	4.17681	2.82821	2.77609	4.0076	0.0672065	1.071	1.1382	1.015	18.2757	4.42778	3.18877	4.81807	8.00684	2.70184	1.16	22.9897	0.93	0.2335	0.201401	1.01891	1.84	78.96	2.55	8.84	7.50979	1.7806	1.67	35.453	3.16	3.14	7.88204	1.2655	1.62	2.23	0.61	68.8591	2.88346	272.5
26.8295	28.928	2.26998	0.339948	0.667037	1.82075	4	4.75495	2.82811	2.77628	4.0076	-0.282128	0.980162	0.698034	1.015	18.2757	4.42778	3.18877	4.81807	8.00684	2.70184	1.16	22.9897	0.93	0.2335	0.201346	1.01894	1.84	78.96	2.55	8.84	7.50979	1.7806	1.67	35.453	3.16	3.14	7.88204	1.2655	1.62	2.23	0.61	68.8591	2.88368	586
26.8295	28.928	2.26998	0.339948	0.667037	1.82075	4	4.65872	2.82432	2.78591	4.0076	-0.184553	0.957833	0.77328	1.015	18.2757	4.42778	3.18877	4.81807	8.00684	2.70184	1.16	22.9897	0.93	0.2335	0.205425	1.01845	1.84	78.96	2.55	8.84	7.50979	1.7806	1.67	35.453	3.16	3.14	7.88204	1.2655	1.62	2.23	0.61	68.8591	2.84928	802
26.8295	28.928	2.26998	0.339948	0.667037	1.82075	4	3.78594	2.82447	2.7862	4.0076	0.256292	1.00279	1.25908	1.015	18.2757	4.42778	3.18877	4.81807	8.00684	2.70184	1.16	22.9897	0.93	0.2335	0.202256	1.01863	1.84	78.96	2.55	8.84	7.50979	1.7806	1.67	35.453	3.16	3.14	7.88204	1.2655	1.62	2.23	0.61	68.8591	2.84942	91
26.8295	28.928	2.26998	0.339948	0.667037	1.82075	4	4.00341	2.82465	2.7642	4.0076	0.173199	0.982602	1.1558	1.015	18.2757	4.42778	3.18877	4.81807	8.00684	2.70184	1.16	22.9897	0.93	0.2335	0.203633	1.00908	1.84	78.96	2.55	8.84	7.50979	1.7806	1.67	35.453	3.16	3.14	7.88204	1.2655	1.62	2.23	0.61	68.8591	2.89756	157
26.8295	28.928	2.26998	0.339948	0.667037	1.82075	4	3.71833	2.82822	2.7765	4.0076	0.349166	0.488394	0.83756	1.015	18.2757	4.42778	3.18877	4.81807	8.00684	2.70184	1.16	22.9897	0.93	0.2335	0.201323	1.01905	1.84	78.96	2.55	8.84	7.50979	1.7806	1.67	35.453	3.16	3.14	7.88204	1.2655	1.62	2.23	0.61	68.8591	2.88337	366.5
26.8295	28.928	2.26998	0.339948	0.667037	1.82075	4	4.49052	2.821	2.77412	4.0076	-0.13209	1.06885	0.93676	1.015	18.2757	4.42778	3.18877	4.81807	8.00684	2.70184	1.16	22.9897	0.93	0.2335	0.204543	1.00876	1.84	78.96	2.55	8.84	7.50979	1.7806	1.67	35.453	3.16	3.14	7.88204	1.2655	1.62	2.23	0.61	68.8591	2.8633	509
26.8295	28.928	2.26998	0.339948	0.667037	1.82075	4	3.64493	2.82812	2.77669	4.0076	0.398799	0.586075	0.984874	1.015	18.2757	4.42778	3.18877	4.81807	8.00684	2.70184	1.16	22.9897	0.93	0.2335	0.201268	1.01909	1.84	78.96	2.55	8.84	7.50979	1.7806	1.67	35.453	3.16	3.14	7.88204	1.2655	1.62	2.23	0.61	68.8591	2.88359	205
26.8295	28.928	2.26998	0.339948	0.667037	1.82075	4	3.5895	2.82075	2.77402	4.0076	0.397893	0.601399	0.999292	1.015	18.2757	4.42778	3.18877	4.81807	8.00684	2.70184	1.16	22.9897	0.93	0.2335	0.204502	1.00862	1.84	78.96	2.55	8.84	7.50979	1.7806	1.67	35.453	3.16	3.14	7.88204	1.2655	1.62	2.23	0.61	68.8591	2.86338	91.5
26.8295	28.928	2.26998	0.339948	0.667037	1.82075	4	3.58227	2.82433	2.78631	4.0076	0.443728	0.590728	1.03446	1.015	18.2757	4.42778	3.18877	4.81807	8.00684	2.70184	1.16	22.9897	0.93	0.2335	0.202191	1.01859	1.84	78.96	2.55	8.84	7.50979	1.7806	1.67	35.453	3.16	3.14	7.88204	1.2655	1.62	2.23	0.61	68.8591	2.84919	180
26.8295	28.928	2.26998	0.339948	0.667037	1.82075	4	3.90364	2.82448	2.78661	4.0076	0.261968	0.951488	1.21346	1.015	18.2757	4.42778	3.18877	4.81807	8.00684	2.70184	1.16	22.9897	0.93	0.2335	0.202179	1.01877	1.84	78.96	2.55	8.84	7.50979	1.7806	1.67	35.453	3.16	3.14	7.88204	1.2655	1.62	2.23	0.61	68.8591	2.84933	74
26.8295	28.928	2.26998	0.339948	0.667037	1.82075	4	3.7163	2.81711	2.78394	4.0076	0.321519	0.464814	0.786333	1.015	18.2757	4.42778	3.18877	4.81807	8.00684	2.70184	1.16	22.9897	0.93	0.2335	0.205412	1.0083	1.84	78.96	2.55	8.84	7.50979	1.7806	1.67	35.453	3.16	3.14	7.88204	1.2655	1.62	2.23	0.61	68.8591	2.82912	486
18.3376	15.281	3.02318	0.361583	0.90269	1.25989	6	3.1885	2.2546	3.1885	3.9051	0.40426	0.9213	1.32556	0.502	34.2244	4.59417	3.53942	9.3787	12.9181	2.00689	1.16	22.9897	0.93	0.2335	0.210043	1.09522	1.19	18.9984	3.98	1.02	7.83539	1.36313	1.84	78.96	2.55	8.84	7.53448	1.92435	1.62	3.05	1.43	28.8585	3.22424	202
29.4053	26.185	2.57437	0.389026	0.796113	1.77341	4.5	3.75608	2.69819	3.25661	4.4173	0.238538	0.913997	1.15254	0.553	19.9626	4.74351	3.34745	9.22861	12.5761	3.08168	1.16	22.9897	0.93	0.2585	0.203927	1.05485	1.7	32.065	2.58	6.99	7.50781	1.8918	2.06	126.904	2.66	6.35	7.88281	1.2783	1.65	1.73	0.08	27.0999	3.19009	270
29.4053	26.185	2.57437	0.389026	0.796113	1.77341	4.5	3.8798	2.69883	3.25351	4.4173	0.176395	1.01823	1.19463	0.553	19.9626	4.74351	3.34745	9.22861	12.5761	3.08168	1.16	22.9897	0.93	0.2585	0.203746	1.05495	1.7	32.065	2.58	6.99	7.50781	1.8918	2.06	126.904	2.66	6.35	7.88281	1.2783	1.65	1.73	0.08	27.0999	3.19017	293
29.4053	26.185	2.57437	0.389026	0.796113	1.77341	4.5	3.87077	2.69792	3.25989	4.4173	0.180658	0.816713	0.997371	0.553	19.9626	4.74351	3.34745	9.22861	12.5761	3.08168	1.16	22.9897	0.93	0.2585	0.201199	1.0552	1.7	32.065	2.58	6.99	7.50781	1.8918	2.06	126.904	2.66	6.35	7.88281	1.2783	1.65	1.73	0.08	27.0999	3.19081	304
29.4053	26.185	2.57437	0.389026	0.796113	1.77341	4.5	3.7618	2.69805	3.25273	4.4173	0.234449	0.941651	1.1761	0.553	19.9626	4.74351	3.34745	9.22861	12.5761	3.08168	1.16	22.9897	0.93	0.2585	0.204043	1.05438	1.7	32.065	2.58	6.99	7.50781	1.8918	2.06	126.904	2.66	6.35	7.88281	1.2783	1.65	1.73	0.08	27.0999	3.19044	249
29.4053	26.185	2.57437	0.389026	0.796113	1.77341	5	3.78663	2.69969	3.25389	4.4173	0.225629	0.818659	1.04429	0.553	19.9626	4.74351	3.34745	9.22861	12.5761	3.08168	1.16	22.9897	0.93	0.2585	0.201348	1.06056	1.7	32.065	2.58	6.99	7.50781	1.8918	2.06	126.904	2.66	6.35	7.88281	1.2783	1.65	1.73	0.08	27.0999	3.19371	291
29.4053	26.185	2.57437	0.389026	0.796113	1.77341	4.5	3.87581	2.69697	3.25439	4.4173	0.177943	0.805468	0.983411	0.553	19.9626	4.74351	3.34745	9.22861	12.5761	3.08168	1.16	22.9897	0.93	0.2585	0.20422	1.05438	1.7	32.065	2.58	6.99	7.50781	1.8918	2.06	126.904	2.66	6.35	7.88281	1.2783	1.65	1.73	0.08	27.0999	3.18991	304
29.4053	26.185	2.57437	0.389026	0.796113	1.77341	5	3.85044	2.69891	3.25311	4.4173	0.192624	1.07678	1.2694	0.553	19.9626	4.74351	3.34745	9.22861	12.5761	3.08168	1.16	22.9897	0.93	0.2585	0.201645	1.05999	1.7	32.065	2.58	6.99	7.50781	1.8918	2.06	126.904	2.66	6.35	7.88281	1.2783	1.65	1.73	0.08	27.0999	3.19398	275
29.4053	26.185	2.57437	0.389026	0.796113	1.77341	4.5	3.75757	2.69762	3.25129	4.4173	0.236865	0.937942	1.17481	0.553	19.9626	4.74351	3.34745	9.22861	12.5761	3.08168	1.16	22.9897	0.93	0.2585	0.20404	1.05448	1.7	32.065	2.58	6.99	7.50781	1.8918	2.06	126.904	2.66	6.35	7.88281	1.2783	1.65	1.73	0.08	27.0999	3.18999	249
29.4053	26.185	2.57437	0.389026	0.796113	1.77341	5	3.84121	2.69943	3.25717	4.4173	0.19779	1.07406	1.27185	0.553	19.9626	4.74351	3.34745	9.22861	12.5761	3.08168	1.16	22.9897	0.93	0.2585	0.201183	1.06091	1.7	32.065	2.58	6.99	7.50781	1.8918	2.06	126.904	2.66	6.35	7.88281	1.2783	1.65	1.73	0.08	27.0999	3.19443	275
29.4053	26.185	2.57437	0.389026	0.796113	1.77341	4.5	3.76115	2.69671	3.25767	4.4173	0.23474	0.912969	1.14771	0.553	19.9626	4.74351	3.34745	9.22861	12.5761	3.08168	1.16	22.9897	0.93	0.2585	0.204056	1.05474	1.7	32.065	2.58	6.99	7.50781	1.8918	2.06	126.904	2.66	6.35	7.88281	1.2783	1.65	1.73	0.08	27.0999	3.19063	270
29.4053	26.185	2.57437	0.389026	0.796113	1.77341	4.5	3.86282	2.69684	3.25051	4.4173	0.183275	1.02009	1.20336	0.553	19.9626	4.74351	3.34745	9.22861	12.5761	3.08168	1.16	22.9897	0.93	0.2585	0.204337	1.05391	1.7	32.065	2.58	6.99	7.50781	1.8918	2.06	126.904	2.66	6.35	7.88281	1.2783	1.65	1.73	0.08	27.0999	3.19026	296
29.4053	26.185	2.57437	0.389026	0.796113	1.77341	5	3.79422	2.69865	3.25638	4.4173	0.220181	0.814875	1.03506	0.553	19.9626	4.74351	3.34745	9.22861	12.5761	3.08168	1.16	22.9897	0.93	0.2585	0.20148	1.06035	1.7	32.065	2.58	6.99	7.50781	1.8918	2.06	126.904	2.66	6.35	7.88281	1.2783	1.65	1.73	0.08	27.0999	3.19471	292
27.1043	26.076	2.21703	0.338189	0.736776	1.83374	4	3.71632	2.70289	2.97607	4.2187	0.262512	0.857148	1.11966	0.328	21.0077	4.83874	3.05076	8.06791	11.1187	2.62729	1.16	22.9897	0.93	0.2585	0.202518	1.01261	1.7	32.065	2.58	6.99	7.50514	1.7915	1.82	79.904	2.96	4.28	7.88589	1.2434	1.65	2.03	0.38	49.6874	3.20771	195
27.1043	26.076	2.21703	0.338189	0.736776	1.83374	4	3.94914	2.7043	2.97823	4.2187	0.146905	1.10164	1.24855	0.328	21.0077	4.83874	3.05076	8.06791	11.1187	2.62729	1.16	22.9897	0.93	0.2585	0.202686	1.01279	1.7	32.065	2.58	6.99	7.50514	1.7915	1.82	79.904	2.96	4.28	7.88589	1.2434	1.65	2.03	0.38	49.6874	3.20849	229.5
27.1043	26.076	2.21703	0.338189	0.736776	1.83374	4	3.97846	2.70357	2.98013	4.2187	0.134029	0.873069	1.0071	0.328	21.0077	4.83874	3.05076	8.06791	11.1187	2.62729	1.16	22.9897	0.93	0.2585	0.203696	1.01157	1.7	32.065	2.58	6.99	7.50514	1.7915	1.82	79.904	2.96	4.28	7.88589	1.2434	1.65	2.03	0.38	49.6874	3.20621	380
27.1043	26.076	2.21703	0.338189	0.736776	1.83374	4	3.71125	2.70352	2.98031	4.2187	0.266669	1.04621	1.31288	0.328	21.0077	4.83874	3.05076	8.06791	11.1187	2.62729	1.16	22.9897	0.93	0.2585	0.2029	1.01189	1.7	32.065	2.58	6.99	7.50514	1.7915	1.82	79.904	2.96	4.28	7.88589	1.2434	1.65	2.03	0.38	49.6874	3.20374	182
27.1043	26.076	2.21703	0.338189	0.736776	1.83374	4	3.72255	2.68566	2.97373	4.2187	0.236692	0.737368	0.97406	0.328	21.0077	4.83874	3.05076	8.06791	11.1187	2.62729	1.16	22.9897	0.93	0.2585	0.20307	1.01185	1.7	32.065	2.58	6.99	7.50514	1.7915	1.82	79.904	2.96	4.28	7.88589	1.2434	1.65	2.03	0.38	49.6874	3.20885	209
27.1043	26.076	2.21703	0.338189	0.736776	1.83374	4	3.92357	2.70193	2.97502	4.2187	0.162632	0.833901	0.996533	0.328	21.0077	4.83874	3.05076	8.06791	11.1187	2.62729	1.16	22.9897	0.93	0.2585	0.202664	1.01206	1.7	32.065	2.58	6.99	7.50514	1.7915	1.82	79.904	2.96	4.28	7.88589	1.2434	1.65	2.03	0.38	49.6874	3.20744	366.5
27.1043	26.076	2.21703	0.338189	0.736776	1.83374	4	3.90131	2.68489	2.9758	4.2187	0.146277	1.14013	1.28641	0.328	21.0077	4.83874	3.05076	8.06791	11.1187	2.62729	1.16	22.9897	0.93	0.2585	0.203284	1.01095	1.7	32.065	2.58	6.99	7.50514	1.7915	1.82	79.904	2.96	4.28	7.88589	1.2434	1.65	2.03	0.38	49.6874	3.2041	201
27.1043	26.076	2.21703	0.338189	0.736776	1.83374	4	3.71468	2.70335	2.97719	4.2187	0.268581	1.0133	1.28188	0.328	21.0077	4.83874	3.05076	8.06791	11.1187	2.62729	1.16	22.9897	0.93	0.2585	0.202832	1.01225	1.7	32.065	2.58	6.99	7.50514	1.7915	1.82	79.904	2.96	4.28	7.88589	1.2434	1.65	2.03	0.38	49.6874	3.20822	166.5
27.1043	26.076	2.21703	0.338189	0.736776	1.83374	4	3.84119	2.68635	2.97778	4.2187	0.181914	1.11155	1.29346	0.328	21.0077	4.83874	3.05076	8.06791	11.1187	2.62729	1.16	22.9897	0.93	0.2585	0.203467	1.01082	1.7	32.065	2.58	6.99	7.50514	1.7915	1.82	79.904	2.96	4.28	7.88589	1.2434	1.65	2.03	0.38	49.6874	3.20735	200
27.1043	26.076	2.21703	0.338189	0.736776	1.83374	4	3.67464	2.70262	2.97908	4.2187	0.287516	0.79758	1.0851	0.328	21.0077	4.83874	3.05076	8.06791	11.1187	2.62729	1.16	22.9897	0.93	0.2585	0.203061	1.01103	1.7	32.065	2.58	6.99	7.50514	1.7915	1.82	79.904	2.96	4.28	7.88589	1.2434	1.65	2.03	0.38	49.6874	3.20594	195
27.1043	26.076	2.21703	0.338189	0.736776	1.83374	4	3.91879	2.70257	2.97926	4.2187	0.164315	1.1124	1.27672	0.328	21.0077	4.83874	3.05076	8.06791	11.1187	2.62729	1.16	22.9897	0.93	0.2585	0.203045	1.01134	1.7	32.065	2.58	6.99	7.50514	1.7915	1.82	79.904	2.96	4.28	7.88589	1.2434	1.65	2.03	0.38	49.6874	3.20347	234
27.1043	26.076	2.21703	0.338189	0.736776	1.83374	4	3.73357	2.68558	2.97986	4.2187	0.233349	0.699552	0.932901	0.328	21.0077	4.83874	3.05076	8.06791	11.1187	2.62729	1.16	22.9897	0.93	0.2585	0.20368	1.00991	1.7	32.065	2.58	6.99	7.50514	1.7915	1.82	79.904	2.96	4.28	7.88589	1.2434	1.65	2.03	0.38	49.6874	3.2026	223
25.2432	25.769	1.79567	0.31762	0.69969	1.81896	4	3.91646	2.7007	2.79703	3.9391	0.159871	1.09347	1.25334	1.242	21.5831	4.982	2.90385	4.62595	7.5298	2.33965	1.16	22.9897	0.93	0.2585	0.200405	1.00048	1.7	32.065	2.58	6.99	7.51262	1.7625	1.67	35.453	3.16	3.14	7.88069	1.2238	1.65	2.23	0.58	63.5726	3.14538	238.5
25.2432	25.769	1.79567	0.31762	0.69969	1.81896	4	4.34378	2.70051	2.79727	3.9391	-0.0751336	1.02199	0.946857	1.242	21.5831	4.982	2.90385	4.62595	7.5298	2.33965	1.16	22.9897	0.93	0.2585	0.200301	1.00053	1.7	32.065	2.58	6.99	7.51262	1.7625	1.67	35.453	3.16	3.14	7.88069	1.2238	1.65	2.23	0.58	63.5726	3.14556	459.5
25.2432	25.769	1.79567	0.31762	0.69969	1.81896	4	4.28414	2.69514	2.7912	3.9391	-0.0298928	0.958666	0.928773	1.242	21.5831	4.982	2.90385	4.62595	7.5298	2.33965	1.16	22.9897	0.93	0.2585	0.20583	0.993147	1.7	32.065	2.58	6.99	7.51262	1.7625	1.67	35.453	3.16	3.14	7.88069	1.2238	1.65	2.23	0.58	63.5726	3.11629	558.5
25.2432	25.769	1.79567	0.31762	0.69969	1.81896	4	3.65429	2.69486	2.79125	3.9391	0.280871	1.03194	1.31282	1.242	21.5831	4.982	2.90385	4.62595	7.5298	2.33965	1.16	22.9897	0.93	0.2585	0.20301	0.993128	1.7	32.065	2.58	6.99	7.51262	1.7625	1.67	35.453	3.16	3.14	7.88069	1.2238	1.65	2.23	0.58	63.5726	3.11625	64.5
25.2432	25.769	1.79567	0.31762	0.69969	1.81896	4	3.82056	2.70098	2.79488	3.9391	0.226201	1.04227	1.26847	1.242	21.5831	4.982	2.90385	4.62595	7.5298	2.33965	1.16	22.9897	0.93	0.2585	0.200607	1.00022	1.7	32.065	2.58	6.99	7.51262	1.7625	1.67	35.453	3.16	3.14	7.88069	1.2238	1.65	2.23	0.58	63.5726	3.14279	176
25.2432	25.769	1.79567	0.31762	0.69969	1.81896	4	3.65555	2.70077	2.79746	3.9391	0.326924	0.569725	0.896649	1.242	21.5831	4.982	2.90385	4.62595	7.5298	2.33965	1.16	22.9897	0.93	0.2585	0.20044	1.00038	1.7	32.065	2.58	6.99	7.51262	1.7625	1.67	35.453	3.16	3.14	7.88069	1.2238	1.65	2.23	0.58	63.5726	3.14519	385
25.2432	25.769	1.79567	0.31762	0.69969	1.81896	4	4.22828	2.69533	2.78886	3.9391	-0.0280806	1.06763	1.03955	1.242	21.5831	4.982	2.90385	4.62595	7.5298	2.33965	1.16	22.9897	0.93	0.2585	0.203316	0.992823	1.7	32.065	2.58	6.99	7.51262	1.7625	1.67	35.453	3.16	3.14	7.88069	1.2238	1.65	2.23	0.58	63.5726	3.11349	408.5
25.2432	25.769	1.79567	0.31762	0.69969	1.81896	4	3.59174	2.70057	2.79769	3.9391	0.371	0.676117	1.04712	1.242	21.5831	4.982	2.90385	4.62595	7.5298	2.33965	1.16	22.9897	0.93	0.2585	0.200337	1.00043	1.7	32.065	2.58	6.99	7.51262	1.7625	1.67	35.453	3.16	3.14	7.88069	1.2238	1.65	2.23	0.58	63.5726	3.14537	219
25.2432	25.769	1.79567	0.31762	0.69969	1.81896	4	3.5243	2.69542	2.78904	3.9391	0.383126	0.709183	1.09231	1.242	21.5831	4.982	2.90385	4.62595	7.5298	2.33965	1.16	22.9897	0.93	0.2585	0.203166	0.992887	1.7	32.065	2.58	6.99	7.51262	1.7625	1.67	35.453	3.16	3.14	7.88069	1.2238	1.65	2.23	0.58	63.5726	3.1137	139.5
25.2432	25.769	1.79567	0.31762	0.69969	1.81896	4	3.5222	2.69521	2.79163	3.9391	0.405665	0.669755	1.07542	1.242	21.5831	4.982	2.90385	4.62595	7.5298	2.33965	1.16	22.9897	0.93	0.2585	0.203	0.993048	1.7	32.065	2.58	6.99	7.51262	1.7625	1.67	35.453	3.16	3.14	7.88069	1.2238	1.65	2.23	0.58	63.5726	3.1161	214.5
25.2432	25.769	1.79567	0.31762	0.69969	1.81896	4	3.76071	2.69492	2.79168	3.9391	0.270195	1.00027	1.27046	1.242	21.5831	4.982	2.90385	4.62595	7.5298	2.33965	1.16	22.9897	0.93	0.2585	0.203045	0.99303	1.7	32.065	2.58	6.99	7.51262	1.7625	1.67	35.453	3.16	3.14	7.88069	1.2238	1.65	2.23	0.58	63.5726	3.11607	121
25.2432	25.769	1.79567	0.31762	0.69969	1.81896	4	3.623	2.68977	2.78303	3.9391	0.316626	0.540222	0.856848	1.242	21.5831	4.982	2.90385	4.62595	7.5298	2.33965	1.16	22.9897	0.93	0.2585	0.205875	0.985488	1.7	32.065	2.58	6.99	7.51262	1.7625	1.67	35.453	3.16	3.14	7.88069	1.2238	1.65	2.23	0.58	63.5726	3.0844	314
17.6452	15.758	2.25918	0.313267	0.860564	1.38228	4.5	3.21265	2.27642	2.77327	3.6437	0.423174	0.752009	1.17518	1.282	31.7713	5.15744	3.18064	11.3562	14.5368	1.77313	1.16	22.9897	0.93	0.2585	0.205921	1.06474	1.19	18.9984	3.98	1.02	7.83664	1.2784	1.7	32.065	2.58	6.99	7.54743	1.9128	1.65	3.05	1.4	44.8568	2.66555	132
17.6452	15.758	2.25918	0.313267	0.860564	1.38228	4.5	3.2332	2.27643	2.77327	3.6437	0.412865	0.720787	1.13365	1.282	31.7713	5.15744	3.18064	11.3562	14.5368	1.77313	1.16	22.9897	0.93	0.2585	0.205908	1.06474	1.19	18.9984	3.98	1.02	7.83664	1.2784	1.7	32.065	2.58	6.99	7.54743	1.9128	1.65	3.05	1.4	44.8568	2.66485	218
17.6452	15.758	2.25918	0.313267	0.860564	1.38228	4.5	3.22616	2.27587	2.77364	3.6437	0.41566	0.918003	1.33366	1.282	31.7713	5.15744	3.18064	11.3562	14.5368	1.77313	1.16	22.9897	0.93	0.2585	0.205918	1.06467	1.19	18.9984	3.98	1.02	7.83664	1.2784	1.7	32.065	2.58	6.99	7.54743	1.9128	1.65	3.05	1.4	44.8568	2.66567	225.5
17.6452	15.758	2.25918	0.313267	0.860564	1.38228	4.5	3.20707	2.27586	2.77363	3.6437	0.426637	0.774963	1.2016	1.282	31.7713	5.15744	3.18064	11.3562	14.5368	1.77313	1.16	22.9897	0.93	0.2585	0.205913	1.06466	1.19	18.9984	3.98	1.02	7.83664	1.2784	1.7	32.065	2.58	6.99	7.54743	1.9128	1.65	3.05	1.4	44.8568	2.66551	163
17.6452	15.758	2.25918	0.313267	0.860564	1.38228	5	3.1844	2.28144	2.76226	3.6437	0.444032	0.742462	1.18649	1.282	31.7713	5.15744	3.18064	11.3562	14.5368	1.77313	1.16	22.9897	0.93	0.2585	0.204121	1.06235	1.19	18.9984	3.98	1.02	7.83664	1.2784	1.7	32.065	2.58	6.99	7.54743	1.9128	1.65	3.05	1.4	44.8568	2.67915	169
17.6452	15.758	2.25918	0.313267	0.860564	1.38228	4.5	3.22628	2.27647	2.77326	3.6437	0.416356	0.917423	1.33378	1.282	31.7713	5.15744	3.18064	11.3562	14.5368	1.77313	1.16	22.9897	0.93	0.2585	0.205921	1.06473	1.19	18.9984	3.98	1.02	7.83664	1.2784	1.7	32.065	2.58	6.99	7.54743	1.9128	1.65	3.05	1.4	44.8568	2.66576	225.5
17.6452	15.758	2.25918	0.313267	0.860564	1.38228	5	3.26813	2.28088	2.76262	3.6437	0.402878	0.900097	1.30297	1.282	31.7713	5.15744	3.18064	11.3562	14.5368	1.77313	1.16	22.9897	0.93	0.2585	0.204125	1.06227	1.19	18.9984	3.98	1.02	7.83664	1.2784	1.7	32.065	2.58	6.99	7.54743	1.9128	1.65	3.05	1.4	44.8568	2.67981	222
17.6452	15.758	2.25918	0.313267	0.860564	1.38228	4.5	3.20606	2.27648	2.77326	3.6437	0.426362	0.77526	1.20162	1.282	31.7713	5.15744	3.18064	11.3562	14.5368	1.77313	1.16	22.9897	0.93	0.2585	0.205908	1.06473	1.19	18.9984	3.98	1.02	7.83664	1.2784	1.7	32.065	2.58	6.99	7.54743	1.9128	1.65	3.05	1.4	44.8568	2.66507	163
17.6452	15.758	2.25918	0.313267	0.860564	1.38228	5	3.26771	2.2809	2.76264	3.6437	0.401532	0.900147	1.30168	1.282	31.7713	5.15744	3.18064	11.3562	14.5368	1.77313	1.16	22.9897	0.93	0.2585	0.204117	1.06228	1.19	18.9984	3.98	1.02	7.83664	1.2784	1.7	32.065	2.58	6.99	7.54743	1.9128	1.65	3.05	1.4	44.8568	2.67927	222
17.6452	15.758	2.25918	0.313267	0.860564	1.38228	4.5	3.21131	2.27592	2.77364	3.6437	0.422938	0.752389	1.17533	1.282	31.7713	5.15744	3.18064	11.3562	14.5368	1.77313	1.16	22.9897	0.93	0.2585	0.205918	1.06466	1.19	18.9984	3.98	1.02	7.83664	1.2784	1.7	32.065	2.58	6.99	7.54743	1.9128	1.65	3.05	1.4	44.8568	2.66589	157
17.6452	15.758	2.25918	0.313267	0.860564	1.38228	4.5	3.23286	2.27591	2.77362	3.6437	0.413666	0.720773	1.13444	1.282	31.7713	5.15744	3.18064	11.3562	14.5368	1.77313	1.16	22.9897	0.93	0.2585	0.205913	1.06465	1.19	18.9984	3.98	1.02	7.83664	1.2784	1.7	32.065	2.58	6.99	7.54743	1.9128	1.65	3.05	1.4	44.8568	2.66573	220
17.6452	15.758	2.25918	0.313267	0.860564	1.38228	5	3.18441	2.28033	2.763	3.6437	0.443901	0.742943	1.18684	1.282	31.7713	5.15744	3.18064	11.3562	14.5368	1.77313	1.16	22.9897	0.93	0.2585	0.204122	1.0622	1.19	18.9984	3.98	1.02	7.83664	1.2784	1.7	32.065	2.58	6.99	7.54743	1.9128	1.65	3.05	1.4	44.8568	2.67993	171
21.3757	17.813	3.29181	0.421009	0.940861	1.35845	6	3.3557	2.3728	3.3557	4.1099	0.417845	0.846112	1.26396	2.704	28.9	4.41402	3.5821	4.84492	8.42702	2.36052	1.16	22.9897	0.93	0.2485	0.217406	1.06409	1.26	15.9994	3.44	2.95	7.47831	2.01334	2.06	126.904	2.66	6.35	7.86947	1.17847	2.51	1.73	0.78	-18.743	2.86913	426
19.6952	16.413	2.78015	0.341521	0.870735	1.40511	6	3.2653	2.3089	3.2653	3.9992	0.37267	1.00787	1.38054	1.199	31.2	4.63549	3.13637	7.44286	10.5792	1.95565	1.16	22.9897	0.93	0.2485	0.217728	1.02898	1.26	15.9994	3.44	2.95	7.45327	1.84745	1.82	79.904	2.96	4.28	7.89355	1.23909	2.51	2.03	0.48	-23.8895	2.84867	355
18.8212	15.6843	2.12489	0.296351	0.826906	1.46551	6	3.2163	2.2743	3.2163	3.93915	0.348152	1.1154	1.46355	0.908	32.408	5.07475	2.86156	20.6278	23.4893	1.72052	1.16	22.9897	0.93	0.2485	0.21561	1.00417	1.26	15.9994	3.44	2.95	7.44238	1.73702	1.67	35.453	3.16	3.14	7.91079	1.2755	2.51	2.23	0.28	0.213706	2.75332	240
14.6345	15.354	2.35937	0.21098	0.686653	1.52821	4	3.27969	2.32093	2.29905	3.2328	0.307758	1.09703	1.40479	2.134	36.7595	4.91828	2.69761	5.5531	8.25071	1.26255	1.16	22.9897	0.93	0.2485	0.217402	0.94194	1.26	15.9994	3.44	2.95	7.49056	1.6724	1.19	18.9984	3.98	1.02	7.85355	1.1525	2.51	3.05	0.54	55.5807	2.76073	353.5
14.6345	15.354	2.35937	0.21098	0.686653	1.52821	4	3.72713	2.30236	2.29909	3.2328	0.066203	1.03769	1.1039	2.134	36.7595	4.91828	2.69761	5.5531	8.25071	1.26255	1.16	22.9897	0.93	0.2485	0.217433	0.941942	1.26	15.9994	3.44	2.95	7.49056	1.6724	1.19	18.9984	3.98	1.02	7.85355	1.1525	2.51	3.05	0.54	55.5807	2.76046	752.5
14.6345	15.354	2.35937	0.21098	0.686653	1.52821	4	3.64381	2.29823	2.29582	3.2328	0.12325	0.98345	1.1067	2.134	36.7595	4.91828	2.69761	5.5531	8.25071	1.26255	1.16	22.9897	0.93	0.2485	0.221061	0.945535	1.26	15.9994	3.44	2.95	7.49056	1.6724	1.19	18.9984	3.98	1.02	7.85355	1.1525	2.51	3.05	0.54	55.5807	2.69528	837.5
14.6345	15.354	2.35937	0.21098	0.686653	1.52821	4	3.01363	2.32124	2.29581	3.2328	0.430295	1.0432	1.47349	2.134	36.7595	4.91828	2.69761	5.5531	8.25071	1.26255	1.16	22.9897	0.93	0.2485	0.218289	0.945523	1.26	15.9994	3.44	2.95	7.49056	1.6724	1.19	18.9984	3.98	1.02	7.85355	1.1525	2.51	3.05	0.54	55.5807	2.6953	111.5
14.6345	15.354	2.35937	0.21098	0.686653	1.52821	4	3.2378	2.28989	2.304	3.2328	0.359404	1.06081	1.42021	2.134	36.7595	4.91828	2.69761	5.5531	8.25071	1.26255	1.16	22.9897	0.93	0.2485	0.219325	0.934528	1.26	15.9994	3.44	2.95	7.49056	1.6724	1.19	18.9984	3.98	1.02	7.85355	1.1525	2.51	3.05	0.54	55.5807	2.75432	226
14.6345	15.354	2.35937	0.21098	0.686653	1.52821	4	3.05957	2.28701	2.29909	3.2328	0.459879	0.604019	1.0639	2.134	36.7595	4.91828	2.69761	5.5531	8.25071	1.26255	1.16	22.9897	0.93	0.2485	0.217411	0.941935	1.26	15.9994	3.44	2.95	7.49056	1.6724	1.19	18.9984	3.98	1.02	7.85355	1.1525	2.51	3.05	0.54	55.5807	2.76067	429.5
14.6345	15.354	2.35937	0.21098	0.686653	1.52821	4	3.54931	2.30877	2.30073	3.2328	0.150652	1.07663	1.22728	2.134	36.7595	4.91828	2.69761	5.5531	8.25071	1.26255	1.16	22.9897	0.93	0.2485	0.220181	0.93811	1.26	15.9994	3.44	2.95	7.49056	1.6724	1.19	18.9984	3.98	1.02	7.85355	1.1525	2.51	3.05	0.54	55.5807	2.68916	610
14.6345	15.354	2.35937	0.21098	0.686653	1.52821	4	3.04602	2.26845	2.29913	3.2328	0.490941	0.710448	1.20139	2.134	36.7595	4.91828	2.69761	5.5531	8.25071	1.26255	1.16	22.9897	0.93	0.2485	0.217442	0.941937	1.26	15.9994	3.44	2.95	7.49056	1.6724	1.19	18.9984	3.98	1.02	7.85355	1.1525	2.51	3.05	0.54	55.5807	2.7604	377.5
14.6345	15.354	2.35937	0.21098	0.686653	1.52821	4	2.95855	2.26719	2.30077	3.2328	0.512653	0.703451	1.2161	2.134	36.7595	4.91828	2.69761	5.5531	8.25071	1.26255	1.16	22.9897	0.93	0.2485	0.220208	0.938123	1.26	15.9994	3.44	2.95	7.49056	1.6724	1.19	18.9984	3.98	1.02	7.85355	1.1525	2.51	3.05	0.54	55.5807	2.68888	132.5
14.6345	15.354	2.35937	0.21098	0.686653	1.52821	4	2.97769	2.26432	2.29586	3.2328	0.520423	0.71067	1.23109	2.134	36.7595	4.91828	2.69761	5.5531	8.25071	1.26255	1.16	22.9897	0.93	0.2485	0.218295	0.94553	1.26	15.9994	3.44	2.95	7.49056	1.6724	1.19	18.9984	3.98	1.02	7.85355	1.1525	2.51	3.05	0.54	55.5807	2.69522	260.5
14.6345	15.354	2.35937	0.21098	0.686653	1.52821	4	3.15546	2.28733	2.29585	3.2328	0.410117	0.997941	1.40806	2.134	36.7595	4.91828	2.69761	5.5531	8.25071	1.26255	1.16	22.9897	0.93	0.2485	0.218298	0.945518	1.26	15.9994	3.44	2.95	7.49056	1.6724	1.19	18.9984	3.98	1.02	7.85355	1.1525	2.51	3.05	0.54	55.5807	2.69524	113.5
14.6345	15.354	2.35937	0.21098	0.686653	1.52821	4	3.06394	2.28607	2.2975	3.2328	0.436397	0.57797	1.01437	2.134	36.7595	4.91828	2.69761	5.5531	8.25071	1.26255	1.16	22.9897	0.93	0.2485	0.221064	0.941705	1.26	15.9994	3.44	2.95	7.49056	1.6724	1.19	18.9984	3.98	1.02	7.85355	1.1525	2.51	3.05	0.54	55.5807	2.62372	439
23.3314	21.398	3.22675	0.537573	0.763882	1.35993	4	3.41308	2.53078	2.92774	4.1442	0.0326166	0.584617	0.617234	0.79	23.9795	5.42365	4.10765	12.5455	16.6532	2.83407	0.9	6.941	0.98	0.075	0.138269	1.10226	1.84	78.96	2.55	6.98	7.67104	1.9344	2.06	126.904	2.66	6.19	7.91291	1.3612	1.57	1.68	0.11	51.5821	3.17527	262.5
23.3314	21.398	3.22675	0.537573	0.763882	1.35993	4	3.57732	2.5302	2.92993	4.1442	-0.0498334	0.734408	0.684574	0.79	23.9795	5.42365	4.10765	12.5455	16.6532	2.83407	0.9	6.941	0.98	0.075	0.138268	1.10303	1.84	78.96	2.55	6.98	7.67104	1.9344	2.06	126.904	2.66	6.19	7.91291	1.3612	1.57	1.68	0.11	51.5821	3.17553	262.5
23.3314	21.398	3.22675	0.537573	0.763882	1.35993	4	3.73675	2.53061	2.93156	4.1442	-0.130437	0.657939	0.527502	0.79	23.9795	5.42365	4.10765	12.5455	16.6532	2.83407	0.9	6.941	0.98	0.075	0.139634	1.10366	1.84	78.96	2.55	6.98	7.67104	1.9344	2.06	126.904	2.66	6.19	7.91291	1.3612	1.57	1.68	0.11	51.5821	3.17537	221
23.3314	21.398	3.22675	0.537573	0.763882	1.35993	4	3.5767	2.5303	2.931	4.1442	-0.0494174	0.748882	0.699465	0.79	23.9795	5.42365	4.10765	12.5455	16.6532	2.83407	0.9	6.941	0.98	0.075	0.138266	1.10242	1.84	78.96	2.55	6.98	7.67104	1.9344	2.06	126.904	2.66	6.19	7.91291	1.3612	1.57	1.68	0.11	51.5821	3.17522	220.5
23.3314	21.398	3.22675	0.537573	0.763882	1.35993	4	3.45464	2.51567	2.96792	4.1442	-0.00780535	0.386024	0.378219	0.79	23.9795	5.42365	4.10765	12.5455	16.6532	2.83407	0.9	6.941	0.98	0.075	0.140004	1.08904	1.84	78.96	2.55	6.98	7.67104	1.9344	2.06	126.904	2.66	6.19	7.91291	1.3612	1.57	1.68	0.11	51.5821	3.18854	226
23.3314	21.398	3.22675	0.537573	0.763882	1.35993	4	3.73917	2.53005	2.92682	4.1442	-0.129473	0.659241	0.529768	0.79	23.9795	5.42365	4.10765	12.5455	16.6532	2.83407	0.9	6.941	0.98	0.075	0.138084	1.10277	1.84	78.96	2.55	6.98	7.67104	1.9344	2.06	126.904	2.66	6.19	7.91291	1.3612	1.57	1.68	0.11	51.5821	3.1754	221
23.3314	21.398	3.22675	0.537573	0.763882	1.35993	4	3.66815	2.51578	2.96899	4.1442	-0.114536	0.77781	0.663274	0.79	23.9795	5.42365	4.10765	12.5455	16.6532	2.83407	0.9	6.941	0.98	0.075	0.140002	1.08843	1.84	78.96	2.55	6.98	7.67104	1.9344	2.06	126.904	2.66	6.19	7.91291	1.3612	1.57	1.68	0.11	51.5821	3.18823	201
23.3314	21.398	3.22675	0.537573	0.763882	1.35993	4	3.58963	2.52946	2.92901	4.1442	-0.0554594	0.746642	0.691183	0.79	23.9795	5.42365	4.10765	12.5455	16.6532	2.83407	0.9	6.941	0.98	0.075	0.138083	1.10353	1.84	78.96	2.55	6.98	7.67104	1.9344	2.06	126.904	2.66	6.19	7.91291	1.3612	1.57	1.68	0.11	51.5821	3.17566	220.5
23.3314	21.398	3.22675	0.537573	0.763882	1.35993	4	3.65956	2.5155	2.97174	4.1442	-0.111768	0.788427	0.676659	0.79	23.9795	5.42365	4.10765	12.5455	16.6532	2.83407	0.9	6.941	0.98	0.075	0.139819	1.09044	1.84	78.96	2.55	6.98	7.67104	1.9344	2.06	126.904	2.66	6.19	7.91291	1.3612	1.57	1.68	0.11	51.5821	3.18864	201
23.3314	21.398	3.22675	0.537573	0.763882	1.35993	4	3.42745	2.52987	2.93064	4.1442	0.025062	0.59973	0.624792	0.79	23.9795	5.42365	4.10765	12.5455	16.6532	2.83407	0.9	6.941	0.98	0.075	0.137899	1.10417	1.84	78.96	2.55	6.98	7.67104	1.9344	2.06	126.904	2.66	6.19	7.91291	1.3612	1.57	1.68	0.11	51.5821	3.1755	262.5
23.3314	21.398	3.22675	0.537573	0.763882	1.35993	4	3.57356	2.52956	2.93007	4.1442	-0.0472268	0.727277	0.68005	0.79	23.9795	5.42365	4.10765	12.5455	16.6532	2.83407	0.9	6.941	0.98	0.075	0.13808	1.10292	1.84	78.96	2.55	6.98	7.67104	1.9344	2.06	126.904	2.66	6.19	7.91291	1.3612	1.57	1.68	0.11	51.5821	3.17535	265
23.3314	21.398	3.22675	0.537573	0.763882	1.35993	4	3.45277	2.5156	2.97281	4.1442	-0.00833196	0.391165	0.382833	0.79	23.9795	5.42365	4.10765	12.5455	16.6532	2.83407	0.9	6.941	0.98	0.075	0.139816	1.08983	1.84	78.96	2.55	6.98	7.67104	1.9344	2.06	126.904	2.66	6.19	7.91291	1.3612	1.57	1.68	0.11	51.5821	3.18832	226
21.0145	20.785	2.83972	0.488676	0.701945	1.26412	4	3.69518	2.51398	2.64953	3.8498	-0.135381	0.782934	0.647553	1.118	24.6819	5.75042	3.69316	6.97275	10.6659	2.37323	0.9	6.941	0.98	0.075	0.140134	1.05432	1.84	78.96	2.55	6.98	7.64633	1.8178	1.82	79.904	2.96	4.13	7.93097	1.3242	1.57	1.98	0.41	64.33	3.32269	189.5
21.0145	20.785	2.83972	0.488676	0.701945	1.26412	4	3.96093	2.5139	2.64572	3.8498	-0.273385	0.690731	0.417346	1.118	24.6819	5.75042	3.69316	6.97275	10.6659	2.37323	0.9	6.941	0.98	0.075	0.13993	1.05529	1.84	78.96	2.55	6.98	7.64633	1.8178	1.82	79.904	2.96	4.13	7.93097	1.3242	1.57	1.98	0.41	64.33	3.32231	284
21.0145	20.785	2.83972	0.488676	0.701945	1.26412	4	3.95032	2.51153	2.64629	3.8498	-0.26284	0.65898	0.39614	1.118	24.6819	5.75042	3.69316	6.97275	10.6659	2.37323	0.9	6.941	0.98	0.075	0.142444	1.04357	1.84	78.96	2.55	6.98	7.64633	1.8178	1.82	79.904	2.96	4.13	7.93097	1.3242	1.57	1.98	0.41	64.33	3.31506	255
21.0145	20.785	2.83972	0.488676	0.701945	1.26412	4	3.49307	2.51034	2.64538	3.8498	-0.0367791	0.825778	0.788999	1.118	24.6819	5.75042	3.69316	6.97275	10.6659	2.37323	0.9	6.941	0.98	0.075	0.140867	1.04435	1.84	78.96	2.55	6.98	7.64633	1.8178	1.82	79.904	2.96	4.13	7.93097	1.3242	1.57	1.98	0.41	64.33	3.31538	104.5
21.0145	20.785	2.83972	0.488676	0.701945	1.26412	4	3.52847	2.51248	2.64536	3.8498	-0.0352456	0.74137	0.706125	1.118	24.6819	5.75042	3.69316	6.97275	10.6659	2.37323	0.9	6.941	0.98	0.075	0.140336	1.05531	1.84	78.96	2.55	6.98	7.64633	1.8178	1.82	79.904	2.96	4.13	7.93097	1.3242	1.57	1.98	0.41	64.33	3.31196	145
21.0145	20.785	2.83972	0.488676	0.701945	1.26412	4	3.39341	2.51454	2.65122	3.8498	0.0433278	0.356993	0.40032	1.118	24.6819	5.75042	3.69316	6.97275	10.6659	2.37323	0.9	6.941	0.98	0.075	0.140428	1.0533	1.84	78.96	2.55	6.98	7.64633	1.8178	1.82	79.904	2.96	4.13	7.93097	1.3242	1.57	1.98	0.41	64.33	3.32315	280
21.0145	20.785	2.83972	0.488676	0.701945	1.26412	4	3.96581	2.50892	2.64502	3.8498	-0.302701	0.756693	0.453992	1.118	24.6819	5.75042	3.69316	6.97275	10.6659	2.37323	0.9	6.941	0.98	0.075	0.141272	1.04438	1.84	78.96	2.55	6.98	7.64633	1.8178	1.82	79.904	2.96	4.13	7.93097	1.3242	1.57	1.98	0.41	64.33	3.30503	270
21.0145	20.785	2.83972	0.488676	0.701945	1.26412	4	3.31566	2.51445	2.64741	3.8498	0.0925121	0.522154	0.614666	1.118	24.6819	5.75042	3.69316	6.97275	10.6659	2.37323	0.9	6.941	0.98	0.075	0.140224	1.05427	1.84	78.96	2.55	6.98	7.64633	1.8178	1.82	79.904	2.96	4.13	7.93097	1.3242	1.57	1.98	0.41	64.33	3.32276	184.5
21.0145	20.785	2.83972	0.488676	0.701945	1.26412	4	3.26015	2.51003	2.64212	3.8498	0.104603	0.552378	0.656981	1.118	24.6819	5.75042	3.69316	6.97275	10.6659	2.37323	0.9	6.941	0.98	0.075	0.141288	1.04456	1.84	78.96	2.55	6.98	7.64633	1.8178	1.82	79.904	2.96	4.13	7.93097	1.3242	1.57	1.98	0.41	64.33	3.30433	134.5
21.0145	20.785	2.83972	0.488676	0.701945	1.26412	4	3.24995	2.51208	2.64798	3.8498	0.12299	0.502609	0.625599	1.118	24.6819	5.75042	3.69316	6.97275	10.6659	2.37323	0.9	6.941	0.98	0.075	0.14138	1.04255	1.84	78.96	2.55	6.98	7.64633	1.8178	1.82	79.904	2.96	4.13	7.93097	1.3242	1.57	1.98	0.41	64.33	3.31552	169
21.0145	20.785	2.83972	0.488676	0.701945	1.26412	4	3.50896	2.51089	2.64707	3.8498	-0.0157086	0.786928	0.77122	1.118	24.6819	5.75042	3.69316	6.97275	10.6659	2.37323	0.9	6.941	0.98	0.075	0.14116	1.04333	1.84	78.96	2.55	6.98	7.64633	1.8178	1.82	79.904	2.96	4.13	7.93097	1.3242	1.57	1.98	0.41	64.33	3.31583	134
21.0145	20.785	2.83972	0.488676	0.701945	1.26412	4	3.37545	2.50647	2.64178	3.8498	0.0345475	0.347931	0.382478	1.118	24.6819	5.75042	3.69316	6.97275	10.6659	2.37323	0.9	6.941	0.98	0.075	0.142225	1.03363	1.84	78.96	2.55	6.98	7.64633	1.8178	1.82	79.904	2.96	4.13	7.93097	1.3242	1.57	1.98	0.41	64.33	3.2974	263
19.168	20.303	2.34312	0.475826	0.663235	1.20282	4	3.7707	2.51445	2.47337	3.6943	-0.176253	0.76797	0.591717	1.367	25.407	5.92932	3.56391	6.2755	9.83941	2.10868	0.9	6.941	0.98	0.075	0.139095	1.051	1.84	78.96	2.55	6.98	7.63381	1.7906	1.67	35.453	3.16	2.94	7.94564	1.3416	1.57	2.18	0.61	73.1032	3.23147	272
19.168	20.303	2.34312	0.475826	0.663235	1.20282	4	4.1379	2.51458	2.4737	3.6943	-0.383948	0.675948	0.292	1.367	25.407	5.92932	3.56391	6.2755	9.83941	2.10868	0.9	6.941	0.98	0.075	0.139093	1.05101	1.84	78.96	2.55	6.98	7.63381	1.7906	1.67	35.453	3.16	2.94	7.94564	1.3416	1.57	2.18	0.61	73.1032	3.23148	377.5
19.168	20.303	2.34312	0.475826	0.663235	1.20282	4	4.09229	2.50968	2.47888	3.6943	-0.342035	0.673883	0.331848	1.367	25.407	5.92932	3.56391	6.2755	9.83941	2.10868	0.9	6.941	0.98	0.075	0.142197	1.04299	1.84	78.96	2.55	6.98	7.63381	1.7906	1.67	35.453	3.16	2.94	7.94564	1.3416	1.57	2.18	0.61	73.1032	3.21184	533.5
19.168	20.303	2.34312	0.475826	0.663235	1.20282	4	3.45491	2.50986	2.47889	3.6943	-0.0192212	0.696628	0.677406	1.367	25.407	5.92932	3.56391	6.2755	9.83941	2.10868	0.9	6.941	0.98	0.075	0.140335	1.04285	1.84	78.96	2.55	6.98	7.63381	1.7906	1.67	35.453	3.16	2.94	7.94564	1.3416	1.57	2.18	0.61	73.1032	3.21155	80
19.168	20.303	2.34312	0.475826	0.663235	1.20282	4	3.55334	2.51393	2.4679	3.6943	-0.0397519	0.669068	0.629316	1.367	25.407	5.92932	3.56391	6.2755	9.83941	2.10868	0.9	6.941	0.98	0.075	0.139923	1.04662	1.84	78.96	2.55	6.98	7.63381	1.7906	1.67	35.453	3.16	2.94	7.94564	1.3416	1.57	2.18	0.61	73.1032	3.23768	113
19.168	20.303	2.34312	0.475826	0.663235	1.20282	4	3.29584	2.51436	2.4732	3.6943	0.10013	0.299554	0.399683	1.367	25.407	5.92932	3.56391	6.2755	9.83941	2.10868	0.9	6.941	0.98	0.075	0.139078	1.05105	1.84	78.96	2.55	6.98	7.63381	1.7906	1.67	35.453	3.16	2.94	7.94564	1.3416	1.57	2.18	0.61	73.1032	3.23179	364
19.168	20.303	2.34312	0.475826	0.663235	1.20282	4	4.06935	2.50921	2.47309	3.6943	-0.37167	0.748263	0.376593	1.367	25.407	5.92932	3.56391	6.2755	9.83941	2.10868	0.9	6.941	0.98	0.075	0.141165	1.03846	1.84	78.96	2.55	6.98	7.63381	1.7906	1.67	35.453	3.16	2.94	7.94564	1.3416	1.57	2.18	0.61	73.1032	3.21775	392.5
19.168	20.303	2.34312	0.475826	0.663235	1.20282	4	3.21389	2.5145	2.47353	3.6943	0.154474	0.439274	0.593747	1.367	25.407	5.92932	3.56391	6.2755	9.83941	2.10868	0.9	6.941	0.98	0.075	0.139076	1.05105	1.84	78.96	2.55	6.98	7.63381	1.7906	1.67	35.453	3.16	2.94	7.94564	1.3416	1.57	2.18	0.61	73.1032	3.2318	149
19.168	20.303	2.34312	0.475826	0.663235	1.20282	4	3.14396	2.50915	2.47341	3.6943	0.168797	0.449129	0.617927	1.367	25.407	5.92932	3.56391	6.2755	9.83941	2.10868	0.9	6.941	0.98	0.075	0.141059	1.03861	1.84	78.96	2.55	6.98	7.63381	1.7906	1.67	35.453	3.16	2.94	7.94564	1.3416	1.57	2.18	0.61	73.1032	3.21805	85.5
19.168	20.303	2.34312	0.475826	0.663235	1.20282	4	3.1505	2.50959	2.4787	3.6943	0.187192	0.439511	0.626703	1.367	25.407	5.92932	3.56391	6.2755	9.83941	2.10868	0.9	6.941	0.98	0.075	0.140214	1.04303	1.84	78.96	2.55	6.98	7.63381	1.7906	1.67	35.453	3.16	2.94	7.94564	1.3416	1.57	2.18	0.61	73.1032	3.21216	143.5
19.168	20.303	2.34312	0.475826	0.663235	1.20282	4	3.48984	2.50978	2.47872	3.6943	0.00702616	0.659584	0.66661	1.367	25.407	5.92932	3.56391	6.2755	9.83941	2.10868	0.9	6.941	0.98	0.075	0.140319	1.04289	1.84	78.96	2.55	6.98	7.63381	1.7906	1.67	35.453	3.16	2.94	7.94564	1.3416	1.57	2.18	0.61	73.1032	3.21187	78.5
19.168	20.303	2.34312	0.475826	0.663235	1.20282	4	3.2681	2.50443	2.4786	3.6943	0.0921643	0.284185	0.37635	1.367	25.407	5.92932	3.56391	6.2755	9.83941	2.10868	0.9	6.941	0.98	0.075	0.142301	1.03045	1.84	78.96	2.55	6.98	7.63381	1.7906	1.67	35.453	3.16	2.94	7.94564	1.3416	1.57	2.18	0.61	73.1032	3.19812	366
12.9059	10.755	3.0566	0.513762	0.92702	0.73482	6	2.8362	2.0055	2.8362	3.4736	0.228105	0.6162	0.844305	0.326	47.4743	6.07766	4.11257	18.7938	22.9064	1.5689	0.9	6.941	0.98	0.075	0.140923	1.19747	1.19	18.9984	3.98	0.89	7.9298	1.59022	1.84	78.96	2.55	6.98	7.64744	2.00446	1.57	3	1.43	57.4884	4.61609	138
21.1456	18.52	2.82378	0.540983	0.805014	1.20941	4.5	3.33718	2.408	2.96846	4.0497	0.0361673	0.643578	0.679745	0.763	27.6757	5.6684	4.06227	13.6228	17.6851	2.55	0.9	6.941	0.98	0.075	0.136201	1.14287	1.7	32.065	2.58	5.63	7.68605	2.0575	2.06	126.904	2.66	6.19	7.9046	1.3654	1.6	1.68	0.08	44.1371	3.39239	295
21.1456	18.52	2.82378	0.540983	0.805014	1.20941	4.5	3.37754	2.40621	2.96688	4.0497	0.0140094	0.678993	0.693003	0.763	27.6757	5.6684	4.06227	13.6228	17.6851	2.55	0.9	6.941	0.98	0.075	0.13628	1.14298	1.7	32.065	2.58	5.63	7.68605	2.0575	2.06	126.904	2.66	6.19	7.9046	1.3654	1.6	1.68	0.08	44.1371	3.39329	294
21.1456	18.52	2.82378	0.540983	0.805014	1.20941	4.5	3.48152	2.40665	2.96643	4.0497	-0.0373184	0.660131	0.622813	0.763	27.6757	5.6684	4.06227	13.6228	17.6851	2.55	0.9	6.941	0.98	0.075	0.136866	1.14206	1.7	32.065	2.58	5.63	7.68605	2.0575	2.06	126.904	2.66	6.19	7.9046	1.3654	1.6	1.68	0.08	44.1371	3.39274	271
21.1456	18.52	2.82378	0.540983	0.805014	1.20941	4.5	3.43259	2.40727	2.96333	4.0497	-0.0118561	0.690769	0.678913	0.763	27.6757	5.6684	4.06227	13.6228	17.6851	2.55	0.9	6.941	0.98	0.075	0.13666	1.14115	1.7	32.065	2.58	5.63	7.68605	2.0575	2.06	126.904	2.66	6.19	7.9046	1.3654	1.6	1.68	0.08	44.1371	3.39296	268.5
21.1456	18.52	2.82378	0.540983	0.805014	1.20941	4	3.3448	2.40041	3.02349	4.0497	0.0219496	0.47934	0.50129	0.763	27.6757	5.6684	4.06227	13.6228	17.6851	2.55	0.9	6.941	0.98	0.075	0.136309	1.1389	1.7	32.065	2.58	5.63	7.68605	2.0575	2.06	126.904	2.66	6.19	7.9046	1.3654	1.6	1.68	0.08	44.1371	3.39224	288
21.1456	18.52	2.82378	0.540983	0.805014	1.20941	4.5	3.45334	2.40774	2.97111	4.0497	-0.0219558	0.666082	0.644127	0.763	27.6757	5.6684	4.06227	13.6228	17.6851	2.55	0.9	6.941	0.98	0.075	0.136176	1.14368	1.7	32.065	2.58	5.63	7.68605	2.0575	2.06	126.904	2.66	6.19	7.9046	1.3654	1.6	1.68	0.08	44.1371	3.39239	271
21.1456	18.52	2.82378	0.540983	0.805014	1.20941	4	3.44607	2.40148	3.01994	4.0497	-0.0270167	0.761484	0.734468	0.763	27.6757	5.6684	4.06227	13.6228	17.6851	2.55	0.9	6.941	0.98	0.075	0.136688	1.13707	1.7	32.065	2.58	5.63	7.68605	2.0575	2.06	126.904	2.66	6.19	7.9046	1.3654	1.6	1.68	0.08	44.1371	3.39191	270
21.1456	18.52	2.82378	0.540983	0.805014	1.20941	4.5	3.44633	2.40595	2.96953	4.0497	-0.0209445	0.693164	0.67222	0.763	27.6757	5.6684	4.06227	13.6228	17.6851	2.55	0.9	6.941	0.98	0.075	0.136256	1.14379	1.7	32.065	2.58	5.63	7.68605	2.0575	2.06	126.904	2.66	6.19	7.9046	1.3654	1.6	1.68	0.08	44.1371	3.39329	268.5
21.1456	18.52	2.82378	0.540983	0.805014	1.20941	4	3.4423	2.39906	3.02146	4.0497	-0.0278757	0.762101	0.734226	0.763	27.6757	5.6684	4.06227	13.6228	17.6851	2.55	0.9	6.941	0.98	0.075	0.136628	1.13809	1.7	32.065	2.58	5.63	7.68605	2.0575	2.06	126.904	2.66	6.19	7.9046	1.3654	1.6	1.68	0.08	44.1371	3.39259	270
21.1456	18.52	2.82378	0.540983	0.805014	1.20941	4.5	3.34443	2.40639	2.96907	4.0497	0.031249	0.661808	0.693057	0.763	27.6757	5.6684	4.06227	13.6228	17.6851	2.55	0.9	6.941	0.98	0.075	0.136494	1.14287	1.7	32.065	2.58	5.63	7.68605	2.0575	2.06	126.904	2.66	6.19	7.9046	1.3654	1.6	1.68	0.08	44.1371	3.39274	295
21.1456	18.52	2.82378	0.540983	0.805014	1.20941	4.5	3.35695	2.40701	2.96598	4.0497	0.0253898	0.656935	0.682325	0.763	27.6757	5.6684	4.06227	13.6228	17.6851	2.55	0.9	6.941	0.98	0.075	0.136635	1.14196	1.7	32.065	2.58	5.63	7.68605	2.0575	2.06	126.904	2.66	6.19	7.9046	1.3654	1.6	1.68	0.08	44.1371	3.39296	293.5
21.1456	18.52	2.82378	0.540983	0.805014	1.20941	4	3.34541	2.40013	3.01791	4.0497	0.0222355	0.469973	0.492208	0.763	27.6757	5.6684	4.06227	13.6228	17.6851	2.55	0.9	6.941	0.98	0.075	0.137007	1.13626	1.7	32.065	2.58	5.63	7.68605	2.0575	2.06	126.904	2.66	6.19	7.9046	1.3654	1.6	1.68	0.08	44.1371	3.39226	287
19.2349	18.154	2.29277	0.476549	0.739742	1.22765	4	3.28169	2.39623	2.64546	3.8536	0.0487483	0.682478	0.731226	0.779	28.8126	6.35739	3.51355	16.666	20.1796	2.09343	0.9	6.941	0.98	0.075	0.13893	1.06473	1.7	32.065	2.58	5.63	7.66231	1.8739	1.82	79.904	2.96	4.13	7.91996	1.3134	1.6	1.98	0.38	56.6576	3.60382	243.5
19.2349	18.154	2.29277	0.476549	0.739742	1.22765	4	3.47974	2.39655	2.64564	3.8536	-0.0521202	0.727822	0.675702	0.779	28.8126	6.35739	3.51355	16.666	20.1796	2.09343	0.9	6.941	0.98	0.075	0.139043	1.06466	1.7	32.065	2.58	5.63	7.66231	1.8739	1.82	79.904	2.96	4.13	7.91996	1.3134	1.6	1.98	0.38	56.6576	3.60526	244.5
19.2349	18.154	2.29277	0.476549	0.739742	1.22765	4	3.54085	2.39672	2.65244	3.8536	-0.0807214	0.60503	0.524309	0.779	28.8126	6.35739	3.51355	16.666	20.1796	2.09343	0.9	6.941	0.98	0.075	0.13977	1.06364	1.7	32.065	2.58	5.63	7.66231	1.8739	1.82	79.904	2.96	4.13	7.91996	1.3134	1.6	1.98	0.38	56.6576	3.60504	293
19.2349	18.154	2.29277	0.476549	0.739742	1.22765	4	3.31685	2.39635	2.65132	3.8536	0.0296379	0.812079	0.841716	0.779	28.8126	6.35739	3.51355	16.666	20.1796	2.09343	0.9	6.941	0.98	0.075	0.13913	1.0635	1.7	32.065	2.58	5.63	7.66231	1.8739	1.82	79.904	2.96	4.13	7.91996	1.3134	1.6	1.98	0.38	56.6576	3.60417	217.5
19.2349	18.154	2.29277	0.476549	0.739742	1.22765	4	3.29146	2.37703	2.6392	3.8536	0.0177984	0.501784	0.519583	0.779	28.8126	6.35739	3.51355	16.666	20.1796	2.09343	0.9	6.941	0.98	0.075	0.13965	1.05994	1.7	32.065	2.58	5.63	7.66231	1.8739	1.82	79.904	2.96	4.13	7.91996	1.3134	1.6	1.98	0.38	56.6576	3.64887	206
19.2349	18.154	2.29277	0.476549	0.739742	1.22765	4	3.48881	2.39544	2.64469	3.8536	-0.0530607	0.5795	0.52644	0.779	28.8126	6.35739	3.51355	16.666	20.1796	2.09343	0.9	6.941	0.98	0.075	0.139007	1.06447	1.7	32.065	2.58	5.63	7.66231	1.8739	1.82	79.904	2.96	4.13	7.91996	1.3134	1.6	1.98	0.38	56.6576	3.60434	292
19.2349	18.154	2.29277	0.476549	0.739742	1.22765	4	3.46965	2.37683	2.64488	3.8536	-0.0725668	0.79208	0.719513	0.779	28.8126	6.35739	3.51355	16.666	20.1796	2.09343	0.9	6.941	0.98	0.075	0.139737	1.05878	1.7	32.065	2.58	5.63	7.66231	1.8739	1.82	79.904	2.96	4.13	7.91996	1.3134	1.6	1.98	0.38	56.6576	3.64778	184
19.2349	18.154	2.29277	0.476549	0.739742	1.22765	4	3.31653	2.39576	2.64488	3.8536	0.0313458	0.811643	0.842989	0.779	28.8126	6.35739	3.51355	16.666	20.1796	2.09343	0.9	6.941	0.98	0.075	0.13912	1.06441	1.7	32.065	2.58	5.63	7.66231	1.8739	1.82	79.904	2.96	4.13	7.91996	1.3134	1.6	1.98	0.38	56.6576	3.60578	215
19.2349	18.154	2.29277	0.476549	0.739742	1.22765	4	3.40798	2.37752	2.64618	3.8536	-0.0383821	0.789716	0.751333	0.779	28.8126	6.35739	3.51355	16.666	20.1796	2.09343	0.9	6.941	0.98	0.075	0.139766	1.05885	1.7	32.065	2.58	5.63	7.66231	1.8739	1.82	79.904	2.96	4.13	7.91996	1.3134	1.6	1.98	0.38	56.6576	3.65008	191
19.2349	18.154	2.29277	0.476549	0.739742	1.22765	4	3.25195	2.39593	2.65167	3.8536	0.0654204	0.64102	0.70644	0.779	28.8126	6.35739	3.51355	16.666	20.1796	2.09343	0.9	6.941	0.98	0.075	0.139124	1.06338	1.7	32.065	2.58	5.63	7.66231	1.8739	1.82	79.904	2.96	4.13	7.91996	1.3134	1.6	1.98	0.38	56.6576	3.60555	240.5
19.2349	18.154	2.29277	0.476549	0.739742	1.22765	4	3.44276	2.39556	2.65056	3.8536	-0.0317699	0.743639	0.711869	0.779	28.8126	6.35739	3.51355	16.666	20.1796	2.09343	0.9	6.941	0.98	0.075	0.139207	1.06324	1.7	32.065	2.58	5.63	7.66231	1.8739	1.82	79.904	2.96	4.13	7.91996	1.3134	1.6	1.98	0.38	56.6576	3.60469	241
19.2349	18.154	2.29277	0.476549	0.739742	1.22765	4	3.28667	2.37733	2.65186	3.8536	0.0213961	0.472154	0.493551	0.779	28.8126	6.35739	3.51355	16.666	20.1796	2.09343	0.9	6.941	0.98	0.075	0.139853	1.05768	1.7	32.065	2.58	5.63	7.66231	1.8739	1.82	79.904	2.96	4.13	7.91996	1.3134	1.6	1.98	0.38	56.6576	3.64899	205
17.7165	17.759	1.65602	0.452558	0.698948	1.20023	4	3.48223	2.38396	2.4773	3.6081	-0.0717188	0.769526	0.697807	1.828	29.6528	6.75147	3.26889	6.79635	10.0652	1.8213	0.9	6.941	0.98	0.075	0.140315	1.03884	1.7	32.065	2.58	5.63	7.646	1.8056	1.67	35.453	3.16	2.94	7.93055	1.2925	1.6	2.18	0.58	67.7426	3.66941	208
17.7165	17.759	1.65602	0.452558	0.698948	1.20023	4	3.78099	2.3843	2.47668	3.6081	-0.224962	0.685523	0.460561	1.828	29.6528	6.75147	3.26889	6.79635	10.0652	1.8213	0.9	6.941	0.98	0.075	0.140223	1.03921	1.7	32.065	2.58	5.63	7.646	1.8056	1.67	35.453	3.16	2.94	7.93055	1.2925	1.6	2.18	0.58	67.7426	3.66895	334.5
17.7165	17.759	1.65602	0.452558	0.698948	1.20023	4	3.75236	2.38038	2.47546	3.6081	-0.207545	0.659347	0.451801	1.828	29.6528	6.75147	3.26889	6.79635	10.0652	1.8213	0.9	6.941	0.98	0.075	0.143159	1.02923	1.7	32.065	2.58	5.63	7.646	1.8056	1.67	35.453	3.16	2.94	7.93055	1.2925	1.6	2.18	0.58	67.7426	3.65364	321
17.7165	17.759	1.65602	0.452558	0.698948	1.20023	4	3.28552	2.38021	2.4766	3.6081	0.0224111	0.809866	0.832277	1.828	29.6528	6.75147	3.26889	6.79635	10.0652	1.8213	0.9	6.941	0.98	0.075	0.141505	1.02967	1.7	32.065	2.58	5.63	7.646	1.8056	1.67	35.453	3.16	2.94	7.93055	1.2925	1.6	2.18	0.58	67.7426	3.65359	87.5
17.7165	17.759	1.65602	0.452558	0.698948	1.20023	4	3.36283	2.38228	2.47293	3.6081	0.00646728	0.732169	0.738636	1.828	29.6528	6.75147	3.26889	6.79635	10.0652	1.8213	0.9	6.941	0.98	0.075	0.140547	1.03914	1.7	32.065	2.58	5.63	7.646	1.8056	1.67	35.453	3.16	2.94	7.93055	1.2925	1.6	2.18	0.58	67.7426	3.6627	158
17.7165	17.759	1.65602	0.452558	0.698948	1.20023	4	3.22495	2.38396	2.47755	3.6081	0.0853088	0.36238	0.447688	1.828	29.6528	6.75147	3.26889	6.79635	10.0652	1.8213	0.9	6.941	0.98	0.075	0.140292	1.03861	1.7	32.065	2.58	5.63	7.646	1.8056	1.67	35.453	3.16	2.94	7.93055	1.2925	1.6	2.18	0.58	67.7426	3.66914	319.5
17.7165	17.759	1.65602	0.452558	0.698948	1.20023	4	3.75916	2.37819	2.47284	3.6081	-0.242809	0.747717	0.504907	1.828	29.6528	6.75147	3.26889	6.79635	10.0652	1.8213	0.9	6.941	0.98	0.075	0.141829	1.0296	1.7	32.065	2.58	5.63	7.646	1.8056	1.67	35.453	3.16	2.94	7.93055	1.2925	1.6	2.18	0.58	67.7426	3.64734	316
17.7165	17.759	1.65602	0.452558	0.698948	1.20023	4	3.16489	2.38429	2.47693	3.6081	0.130332	0.516036	0.646368	1.828	29.6528	6.75147	3.26889	6.79635	10.0652	1.8213	0.9	6.941	0.98	0.075	0.140201	1.03899	1.7	32.065	2.58	5.63	7.646	1.8056	1.67	35.453	3.16	2.94	7.93055	1.2925	1.6	2.18	0.58	67.7426	3.66868	175
17.7165	17.759	1.65602	0.452558	0.698948	1.20023	4	3.09695	2.37869	2.47108	3.6081	0.145678	0.53985	0.685528	1.828	29.6528	6.75147	3.26889	6.79635	10.0652	1.8213	0.9	6.941	0.98	0.075	0.141807	1.02954	1.7	32.065	2.58	5.63	7.646	1.8056	1.67	35.453	3.16	2.94	7.93055	1.2925	1.6	2.18	0.58	67.7426	3.64694	136.5
17.7165	17.759	1.65602	0.452558	0.698948	1.20023	4	3.10275	2.38037	2.47571	3.6081	0.156048	0.509767	0.665815	1.828	29.6528	6.75147	3.26889	6.79635	10.0652	1.8213	0.9	6.941	0.98	0.075	0.141552	1.02901	1.7	32.065	2.58	5.63	7.646	1.8056	1.67	35.453	3.16	2.94	7.93055	1.2925	1.6	2.18	0.58	67.7426	3.65337	187
17.7165	17.759	1.65602	0.452558	0.698948	1.20023	4	3.32669	2.3802	2.47685	3.6081	0.0327897	0.77536	0.80815	1.828	29.6528	6.75147	3.26889	6.79635	10.0652	1.8213	0.9	6.941	0.98	0.075	0.141483	1.02944	1.7	32.065	2.58	5.63	7.646	1.8056	1.67	35.453	3.16	2.94	7.93055	1.2925	1.6	2.18	0.58	67.7426	3.65332	138.5
17.7165	17.759	1.65602	0.452558	0.698948	1.20023	4	3.19052	2.37461	2.471	3.6081	0.0816406	0.344	0.425641	1.828	29.6528	6.75147	3.26889	6.79635	10.0652	1.8213	0.9	6.941	0.98	0.075	0.143089	1.02	1.7	32.065	2.58	5.63	7.646	1.8056	1.67	35.453	3.16	2.94	7.93055	1.2925	1.6	2.18	0.58	67.7426	3.63158	263
12.085	10.734	1.9755	0.457397	0.879654	0.81091	5	2.79302	2.00265	2.44057	3.2614	0.245403	0.487363	0.732767	1.625	43.2067	7.08274	3.63182	21.9199	25.5517	1.34824	0.9	6.941	0.98	0.075	0.141326	1.14933	1.19	18.9984	3.98	0.89	7.91808	1.4626	1.7	32.065	2.58	5.63	7.65948	1.983	1.6	3	1.4	67.5531	2.98495	99.5
12.085	10.734	1.9755	0.457397	0.879654	0.81091	5	2.84812	2.00257	2.44065	3.2614	0.219174	0.428556	0.647731	1.625	43.2067	7.08274	3.63182	21.9199	25.5517	1.34824	0.9	6.941	0.98	0.075	0.141321	1.14932	1.19	18.9984	3.98	0.89	7.91808	1.4626	1.7	32.065	2.58	5.63	7.65948	1.983	1.6	3	1.4	67.5531	2.98497	158.5
12.085	10.734	1.9755	0.457397	0.879654	0.81091	5	2.86945	2.00212	2.44071	3.2614	0.206459	0.583505	0.789964	1.625	43.2067	7.08274	3.63182	21.9199	25.5517	1.34824	0.9	6.941	0.98	0.075	0.141387	1.14934	1.19	18.9984	3.98	0.89	7.91808	1.4626	1.7	32.065	2.58	5.63	7.65948	1.983	1.6	3	1.4	67.5531	2.98512	146.5
12.085	10.734	1.9755	0.457397	0.879654	0.81091	5	2.81836	2.00218	2.44089	3.2614	0.234544	0.531866	0.766411	1.625	43.2067	7.08274	3.63182	21.9199	25.5517	1.34824	0.9	6.941	0.98	0.075	0.141367	1.14933	1.19	18.9984	3.98	0.89	7.91808	1.4626	1.7	32.065	2.58	5.63	7.65948	1.983	1.6	3	1.4	67.5531	2.98522	103.5
12.085	10.734	1.9755	0.457397	0.879654	0.81091	5	2.80667	2.00734	2.42973	3.2614	0.246406	0.478344	0.72475	1.625	43.2067	7.08274	3.63182	21.9199	25.5517	1.34824	0.9	6.941	0.98	0.075	0.139659	1.14653	1.19	18.9984	3.98	0.89	7.91808	1.4626	1.7	32.065	2.58	5.63	7.65948	1.983	1.6	3	1.4	67.5531	3.00082	124
12.085	10.734	1.9755	0.457397	0.879654	0.81091	5	2.87024	2.00269	2.4407	3.2614	0.206826	0.583136	0.789962	1.625	43.2067	7.08274	3.63182	21.9199	25.5517	1.34824	0.9	6.941	0.98	0.075	0.141316	1.14932	1.19	18.9984	3.98	0.89	7.91808	1.4626	1.7	32.065	2.58	5.63	7.65948	1.983	1.6	3	1.4	67.5531	2.98494	146.5
12.085	10.734	1.9755	0.457397	0.879654	0.81091	5	2.87231	2.00695	2.42998	3.2614	0.214051	0.62251	0.836561	1.625	43.2067	7.08274	3.63182	21.9199	25.5517	1.34824	0.9	6.941	0.98	0.075	0.139705	1.14654	1.19	18.9984	3.98	0.89	7.91808	1.4626	1.7	32.065	2.58	5.63	7.65948	1.983	1.6	3	1.4	67.5531	3.00107	141
12.085	10.734	1.9755	0.457397	0.879654	0.81091	5	2.81889	2.00262	2.44078	3.2614	0.23378	0.531962	0.765742	1.625	43.2067	7.08274	3.63182	21.9199	25.5517	1.34824	0.9	6.941	0.98	0.075	0.141312	1.14931	1.19	18.9984	3.98	0.89	7.91808	1.4626	1.7	32.065	2.58	5.63	7.65948	1.983	1.6	3	1.4	67.5531	2.98497	103.5
12.085	10.734	1.9755	0.457397	0.879654	0.81091	5	2.87299	2.00681	2.42987	3.2614	0.21242	0.623161	0.835581	1.625	43.2067	7.08274	3.63182	21.9199	25.5517	1.34824	0.9	6.941	0.98	0.075	0.13972	1.14654	1.19	18.9984	3.98	0.89	7.91808	1.4626	1.7	32.065	2.58	5.63	7.65948	1.983	1.6	3	1.4	67.5531	3.00099	141
12.085	10.734	1.9755	0.457397	0.879654	0.81091	5	2.79341	2.00216	2.44084	3.2614	0.244494	0.487664	0.732157	1.625	43.2067	7.08274	3.63182	21.9199	25.5517	1.34824	0.9	6.941	0.98	0.075	0.141377	1.14933	1.19	18.9984	3.98	0.89	7.91808	1.4626	1.7	32.065	2.58	5.63	7.65948	1.983	1.6	3	1.4	67.5531	2.98511	99.5
12.085	10.734	1.9755	0.457397	0.879654	0.81091	5	2.84884	2.00223	2.44103	3.2614	0.219342	0.428929	0.64827	1.625	43.2067	7.08274	3.63182	21.9199	25.5517	1.34824	0.9	6.941	0.98	0.075	0.141357	1.14932	1.19	18.9984	3.98	0.89	7.91808	1.4626	1.7	32.065	2.58	5.63	7.65948	1.983	1.6	3	1.4	67.5531	2.98521	156.5
12.085	10.734	1.9755	0.457397	0.879654	0.81091	5	2.8064	2.00643	2.43012	3.2614	0.24631	0.478408	0.724718	1.625	43.2067	7.08274	3.63182	21.9199	25.5517	1.34824	0.9	6.941	0.98	0.075	0.139766	1.14655	1.19	18.9984	3.98	0.89	7.91808	1.4626	1.7	32.065	2.58	5.63	7.65948	1.983	1.6	3	1.4	67.5531	3.00124	122
14.4087	12.007	3.77376	0.624577	0.968998	0.73737	6	2.9423	2.0805	2.9423	3.6035	0.21114	0.488086	0.699226	4.755	43.4	6.37806	4.3011	10.2689	14.57	1.8021	0.9	6.941	0.98	0.065	0.147861	1.18602	1.26	15.9994	3.44	1.95	7.643	2.3927	2.06	126.904	2.66	6.19	7.91341	1.16606	2.46	1.68	0.78	86.95	4.14222	297
12.6984	10.582	3.05281	0.529698	0.890431	0.74108	6	2.8209	1.9947	2.8209	3.4549	0.15046	0.62299	0.77345	4.35	48.6	7.30384	3.55909	8.80107	12.3602	1.39554	0.9	6.941	0.98	0.065	0.148189	1.13717	1.26	15.9994	3.44	1.95	7.64573	2.17375	1.82	79.904	2.96	4.13	7.9097	1.23782	2.46	1.98	0.48	21.8708	4.06781	370
11.7637	9.803	2.04045	0.474142	0.841326	0.7673	6	2.7499	1.9445	2.7499	3.368	0.11497	0.711516	0.826486	1.008	52.9	8.06537	3.11637	13.3817	16.4981	1.16167	0.9	6.941	0.98	0.065	0.148034	1.1006	1.26	15.9994	3.44	1.95	7.62517	2.02081	1.67	35.453	3.16	2.94	7.93072	1.2801	2.46	2.18	0.28	11.0605	3.98293	325
9.24257	9.303	2.00578	0.334061	0.684191	0.84567	4	2.7508	1.90868	1.98793	2.8723	0.0633691	0.784315	0.847684	3.253	59.6864	8.64323	2.51662	7.39157	9.90818	0.740912	0.9	6.941	0.98	0.065	0.154262	0.989652	1.26	15.9994	3.44	1.95	7.62197	1.7595	1.19	18.9984	3.98	0.89	7.91036	1.1988	2.46	3	0.54	55.0885	4.05832	243.5
9.24257	9.303	2.00578	0.334061	0.684191	0.84567	4	3.00291	1.90867	1.98794	2.8723	-0.0562018	0.72193	0.665729	3.253	59.6864	8.64323	2.51662	7.39157	9.90818	0.740912	0.9	6.941	0.98	0.065	0.154218	0.989653	1.26	15.9994	3.44	1.95	7.62197	1.7595	1.19	18.9984	3.98	0.89	7.91036	1.1988	2.46	3	0.54	55.0885	4.05795	466.5
9.24257	9.303	2.00578	0.334061	0.684191	0.84567	4	2.96584	1.90284	1.97606	2.8723	-0.0374461	0.682896	0.64545	3.253	59.6864	8.64323	2.51662	7.39157	9.90818	0.740912	0.9	6.941	0.98	0.065	0.1593	0.984648	1.26	15.9994	3.44	1.95	7.62197	1.7595	1.19	18.9984	3.98	0.89	7.91036	1.1988	2.46	3	0.54	55.0885	4.01594	480
9.24257	9.303	2.00578	0.334061	0.684191	0.84567	4	2.59964	1.90285	1.97608	2.8723	0.129683	0.940343	1.07003	3.253	59.6864	8.64323	2.51662	7.39157	9.90818	0.740912	0.9	6.941	0.98	0.065	0.156551	0.984645	1.26	15.9994	3.44	1.95	7.62197	1.7595	1.19	18.9984	3.98	0.89	7.91036	1.1988	2.46	3	0.54	55.0885	4.01563	64.5
9.24257	9.303	2.00578	0.334061	0.684191	0.84567	4	2.69913	1.90989	1.99432	2.8723	0.113567	0.735095	0.848662	3.253	59.6864	8.64323	2.51662	7.39157	9.90818	0.740912	0.9	6.941	0.98	0.065	0.154646	0.989312	1.26	15.9994	3.44	1.95	7.62197	1.7595	1.19	18.9984	3.98	0.89	7.91036	1.1988	2.46	3	0.54	55.0885	4.04489	178
9.24257	9.303	2.00578	0.334061	0.684191	0.84567	4	2.63027	1.90846	1.98797	2.8723	0.163024	0.442505	0.605528	3.253	59.6864	8.64323	2.51662	7.39157	9.90818	0.740912	0.9	6.941	0.98	0.065	0.154229	0.989607	1.26	15.9994	3.44	1.95	7.62197	1.7595	1.19	18.9984	3.98	0.89	7.91036	1.1988	2.46	3	0.54	55.0885	4.05845	370
9.24257	9.303	2.00578	0.334061	0.684191	0.84567	4	2.96491	1.90407	1.98246	2.8723	-0.0651062	0.748115	0.683009	3.253	59.6864	8.64323	2.51662	7.39157	9.90818	0.740912	0.9	6.941	0.98	0.065	0.156979	0.984303	1.26	15.9994	3.44	1.95	7.62197	1.7595	1.19	18.9984	3.98	0.89	7.91036	1.1988	2.46	3	0.54	55.0885	4.00257	423
9.24257	9.303	2.00578	0.334061	0.684191	0.84567	4	2.61264	1.90845	1.98798	2.8723	0.192671	0.588376	0.781047	3.253	59.6864	8.64323	2.51662	7.39157	9.90818	0.740912	0.9	6.941	0.98	0.065	0.154184	0.989608	1.26	15.9994	3.44	1.95	7.62197	1.7595	1.19	18.9984	3.98	0.89	7.91036	1.1988	2.46	3	0.54	55.0885	4.05808	232
9.24257	9.303	2.00578	0.334061	0.684191	0.84567	4	2.54885	1.90406	1.98244	2.8723	0.20128	0.596544	0.797824	3.253	59.6864	8.64323	2.51662	7.39157	9.90818	0.740912	0.9	6.941	0.98	0.065	0.15695	0.984308	1.26	15.9994	3.44	1.95	7.62197	1.7595	1.19	18.9984	3.98	0.89	7.91036	1.1988	2.46	3	0.54	55.0885	4.00251	169.5
9.24257	9.303	2.00578	0.334061	0.684191	0.84567	4	2.56298	1.90262	1.9761	2.8723	0.211218	0.573348	0.784566	3.253	59.6864	8.64323	2.51662	7.39157	9.90818	0.740912	0.9	6.941	0.98	0.065	0.156533	0.984603	1.26	15.9994	3.44	1.95	7.62197	1.7595	1.19	18.9984	3.98	0.89	7.91036	1.1988	2.46	3	0.54	55.0885	4.01607	219
9.24257	9.303	2.00578	0.334061	0.684191	0.84567	4	2.6842	1.90263	1.97612	2.8723	0.129435	0.760665	0.8901	3.253	59.6864	8.64323	2.51662	7.39157	9.90818	0.740912	0.9	6.941	0.98	0.065	0.156518	0.9846	1.26	15.9994	3.44	1.95	7.62197	1.7595	1.19	18.9984	3.98	0.89	7.91036	1.1988	2.46	3	0.54	55.0885	4.01576	162.5
9.24257	9.303	2.00578	0.334061	0.684191	0.84567	4	2.58889	1.89823	1.97058	2.8723	0.154243	0.419695	0.573938	3.253	59.6864	8.64323	2.51662	7.39157	9.90818	0.740912	0.9	6.941	0.98	0.065	0.159284	0.9793	1.26	15.9994	3.44	1.95	7.62197	1.7595	1.19	18.9984	3.98	0.89	7.91036	1.1988	2.46	3	0.54	55.0885	3.96019	316

## Sheet: Dumbell data
V_a	V_octa	rho_m	PF_A	t	Di	CN_C	CCD	COD	CFD	AAD	PW_c	PW_2c	PW	w_LEO	B	Eg	eps_e	eps_i	eps	alpha	r_C	m_C	EN_C	alpha_C	BC_C	BEC_C	r_O	m_O	EN_O	alpha_O	BC_O	BEC_O	r_F	m_F	EN_F	alpha_F	BC_F	BEC_F	I_C-Ch	I_C-H	I_Ch-H	Ed	Ef	Energy barrier (target)
45.5221	43.6822	2.35762	0.275522	0.753405	2.24563	4	4.35768	3.20616	3.60835	4.9513	0.51399	0.976	1.48999	0.454	11.3828	3.73612	3.01387	2.92797	5.94184	4.36508	1.52	39.0983	0.82	1.205	0.494893	1.10226	1.84	78.96	2.55	9.93	6.91527	1.9344	2.06	126.904	2.66	6.66	7.53888	1.3612	1.73	1.84	0.11	45.2901	0.31475	209
45.5221	43.6822	2.35762	0.275522	0.753405	2.24563	4	4.67555	3.20548	3.60682	4.9513	0.362533	1.51283	1.87536	0.454	11.3828	3.73612	3.01387	2.92797	5.94184	4.36508	1.52	39.0983	0.82	1.205	0.505608	1.10303	1.84	78.96	2.55	9.93	6.91527	1.9344	2.06	126.904	2.66	6.66	7.53888	1.3612	1.73	1.84	0.11	45.2901	0.28905	85.5
45.5221	43.6822	2.35762	0.275522	0.753405	2.24563	4	4.70208	3.20578	3.60963	4.9513	0.341471	1.18072	1.52219	0.454	11.3828	3.73612	3.01387	2.92797	5.94184	4.36508	1.52	39.0983	0.82	1.205	0.455112	1.10366	1.84	78.96	2.55	9.93	6.91527	1.9344	2.06	126.904	2.66	6.66	7.53888	1.3612	1.73	1.84	0.11	45.2901	0.313601	162.5
45.5221	43.6822	2.35762	0.275522	0.753405	2.24563	4	4.40069	3.20487	3.60733	4.9513	0.498631	1.30297	1.8016	0.454	11.3828	3.73612	3.01387	2.92797	5.94184	4.36508	1.52	39.0983	0.82	1.205	0.483918	1.10242	1.84	78.96	2.55	9.93	6.91527	1.9344	2.06	126.904	2.66	6.66	7.53888	1.3612	1.73	1.84	0.11	45.2901	0.288851	71
45.5221	43.6822	2.35762	0.275522	0.753405	2.24563	4	4.44845	3.19536	3.615	4.9513	0.456785	0.930614	1.3874	0.454	11.3828	3.73612	3.01387	2.92797	5.94184	4.36508	1.52	39.0983	0.82	1.205	0.475077	1.08904	1.84	78.96	2.55	9.93	6.91527	1.9344	2.06	126.904	2.66	6.66	7.53888	1.3612	1.73	1.84	0.11	45.2901	0.2739	76
45.5221	43.6822	2.35762	0.275522	0.753405	2.24563	4	4.70039	3.20513	3.60845	4.9513	0.339306	1.1777	1.51701	0.454	11.3828	3.73612	3.01387	2.92797	5.94184	4.36508	1.52	39.0983	0.82	1.205	0.504054	1.10277	1.84	78.96	2.55	9.93	6.91527	1.9344	2.06	126.904	2.66	6.66	7.53888	1.3612	1.73	1.84	0.11	45.2901	0.31335	169.5
45.5221	43.6822	2.35762	0.275522	0.753405	2.24563	4	4.59514	3.19475	3.61551	4.9513	0.384942	1.37822	1.76316	0.454	11.3828	3.73612	3.01387	2.92797	5.94184	4.36508	1.52	39.0983	0.82	1.205	0.453387	1.08843	1.84	78.96	2.55	9.93	6.91527	1.9344	2.06	126.904	2.66	6.66	7.53888	1.3612	1.73	1.84	0.11	45.2901	0.275151	59.5
45.5221	43.6822	2.35762	0.275522	0.753405	2.24563	4	4.40498	3.20445	3.60693	4.9513	0.494407	1.29324	1.78765	0.454	11.3828	3.73612	3.01387	2.92797	5.94184	4.36508	1.52	39.0983	0.82	1.205	0.514769	1.10353	1.84	78.96	2.55	9.93	6.91527	1.9344	2.06	126.904	2.66	6.66	7.53888	1.3612	1.73	1.84	0.11	45.2901	0.28795	66
45.5221	43.6822	2.35762	0.275522	0.753405	2.24563	4	4.58943	3.19498	3.61628	4.9513	0.390248	1.3623	1.75255	0.454	11.3828	3.73612	3.01387	2.92797	5.94184	4.36508	1.52	39.0983	0.82	1.205	0.470452	1.09044	1.84	78.96	2.55	9.93	6.91527	1.9344	2.06	126.904	2.66	6.66	7.53888	1.3612	1.73	1.84	0.11	45.2901	0.2749	60.5
45.5221	43.6822	2.35762	0.275522	0.753405	2.24563	4	4.36406	3.20475	3.60973	4.9513	0.507132	0.968246	1.47538	0.454	11.3828	3.73612	3.01387	2.92797	5.94184	4.36508	1.52	39.0983	0.82	1.205	0.499429	1.10417	1.84	78.96	2.55	9.93	6.91527	1.9344	2.06	126.904	2.66	6.66	7.53888	1.3612	1.73	1.84	0.11	45.2901	0.3122	261
45.5221	43.6822	2.35762	0.275522	0.753405	2.24563	4	4.67062	3.20384	3.60743	4.9513	0.360262	1.51402	1.87429	0.454	11.3828	3.73612	3.01387	2.92797	5.94184	4.36508	1.52	39.0983	0.82	1.205	0.493079	1.10292	1.84	78.96	2.55	9.93	6.91527	1.9344	2.06	126.904	2.66	6.66	7.53888	1.3612	1.73	1.84	0.11	45.2901	0.287751	90.5
45.5221	43.6822	2.35762	0.275522	0.753405	2.24563	4	4.45022	3.19437	3.61679	4.9513	0.457108	0.922287	1.3794	0.454	11.3828	3.73612	3.01387	2.92797	5.94184	4.36508	1.52	39.0983	0.82	1.205	0.448762	1.08983	1.84	78.96	2.55	9.93	6.91527	1.9344	2.06	126.904	2.66	6.66	7.53888	1.3612	1.73	1.84	0.11	45.2901	0.276151	71
41.9993	43.2404	2.18372	0.244511	0.702898	2.19046	4	4.65468	3.2068	3.33445	4.5855	0.36613	1.43648	1.80261	0.635	12.0254	3.81165	2.92549	2.06802	4.99351	3.91963	1.52	39.0983	0.82	1.205	0.465869	1.0355	1.84	78.96	2.55	9.93	6.9649	1.9096	1.82	79.904	2.96	4.54	7.65046	1.1903	1.73	2.14	0.41	57.8826	0.467378	265.5
41.9993	43.2404	2.18372	0.244511	0.702898	2.19046	4	5.18284	3.20675	3.33517	4.5855	0.0722327	1.42453	1.49676	0.635	12.0254	3.81165	2.92549	2.06802	4.99351	3.91963	1.52	39.0983	0.82	1.205	0.461178	1.03554	1.84	78.96	2.55	9.93	6.9649	1.9096	1.82	79.904	2.96	4.54	7.65046	1.1903	1.73	2.14	0.41	57.8826	0.346928	251
41.9993	43.2404	2.18372	0.244511	0.702898	2.19046	4	5.08899	3.20264	3.32028	4.5855	0.139849	1.29925	1.4391	0.635	12.0254	3.81165	2.92549	2.06802	4.99351	3.91963	1.52	39.0983	0.82	1.205	0.416937	1.02997	1.84	78.96	2.55	9.93	6.9649	1.9096	1.82	79.904	2.96	4.54	7.65046	1.1903	1.73	2.14	0.41	57.8826	0.387829	203.5
41.9993	43.2404	2.18372	0.244511	0.702898	2.19046	4	4.32126	3.20333	3.32069	4.5855	0.524953	1.40452	1.92947	0.635	12.0254	3.81165	2.92549	2.06802	4.99351	3.91963	1.52	39.0983	0.82	1.205	0.447346	1.03011	1.84	78.96	2.55	9.93	6.9649	1.9096	1.82	79.904	2.96	4.54	7.65046	1.1903	1.73	2.14	0.41	57.8826	0.254028	33
41.9993	43.2404	2.18372	0.244511	0.702898	2.19046	4	4.5513	3.212	3.34391	4.5855	0.444185	1.40999	1.85418	0.635	12.0254	3.81165	2.92549	2.06802	4.99351	3.91963	1.52	39.0983	0.82	1.205	0.462778	1.0394	1.84	78.96	2.55	9.93	6.9649	1.9096	1.82	79.904	2.96	4.54	7.65046	1.1903	1.73	2.14	0.41	57.8826	0.276278	51
41.9993	43.2404	2.18372	0.244511	0.702898	2.19046	4	4.18793	3.20858	3.32942	4.5855	0.160035	1.44826	1.60829	0.635	12.0254	3.81165	2.92549	2.06802	4.99351	3.91963	1.52	39.0983	0.82	1.205	0.448946	1.03396	1.84	78.96	2.55	9.93	6.9649	1.9096	1.82	79.904	2.96	4.54	7.65046	1.1903	1.73	2.14	0.41	57.8826	0.389879	159
41.9993	43.2404	2.18372	0.244511	0.702898	2.19046	4	4.26007	3.20702	3.33522	4.5855	0.626301	0.883793	1.51009	0.635	12.0254	3.81165	2.92549	2.06802	4.99351	3.91963	1.52	39.0983	0.82	1.205	0.455668	1.03561	1.84	78.96	2.55	9.93	6.9649	1.9096	1.82	79.904	2.96	4.54	7.65046	1.1903	1.73	2.14	0.41	57.8826	0.345178	134.5
41.9993	43.2404	2.18372	0.244511	0.702898	2.19046	4	4.18785	3.20784	3.32974	4.5855	0.636535	0.922126	1.55866	0.635	12.0254	3.81165	2.92549	2.06802	4.99351	3.91963	1.52	39.0983	0.82	1.205	0.437512	1.03386	1.84	78.96	2.55	9.93	6.9649	1.9096	1.82	79.904	2.96	4.54	7.65046	1.1903	1.73	2.14	0.41	57.8826	0.388329	155
41.9993	43.2404	2.18372	0.244511	0.702898	2.19046	4	4.47801	3.2036	3.32073	4.5855	0.503781	1.36051	1.86429	0.635	12.0254	3.81165	2.92549	2.06802	4.99351	3.91963	1.52	39.0983	0.82	1.205	0.441835	1.03018	1.84	78.96	2.55	9.93	6.9649	1.9096	1.82	79.904	2.96	4.54	7.65046	1.1903	1.73	2.14	0.41	57.8826	0.252279	24
38.547	42.4928	1.99632	0.236611	0.671331	2.09472	4	4.21666	3.21548	3.14816	4.4309	0.587797	1.37216	1.95996	0.691	12.0615	3.9093	2.95238	4.21423	7.16662	3.62788	1.52	39.0983	0.82	1.205	0.476257	1.04922	1.84	78.96	2.55	9.93	6.87591	1.9213	1.67	35.453	3.16	3.36	7.61288	1.2107	1.73	2.34	0.61	59.4136	0.423252	80.5
38.547	42.4928	1.99632	0.236611	0.671331	2.09472	4	4.5647	3.22117	3.1212	4.4309	0.442283	1.38029	1.82257	0.691	12.0615	3.9093	2.95238	4.21423	7.16662	3.62788	1.52	39.0983	0.82	1.205	0.484882	1.03334	1.84	78.96	2.55	9.93	6.87591	1.9213	1.67	35.453	3.16	3.36	7.61288	1.2107	1.73	2.34	0.61	59.4136	0.524303	131
38.547	42.4928	1.99632	0.236611	0.671331	2.09472	4	4.42223	3.21457	3.14868	4.4309	0.590832	1.28704	1.87788	0.691	12.0615	3.9093	2.95238	4.21423	7.16662	3.62788	1.52	39.0983	0.82	1.205	0.483027	1.04934	1.84	78.96	2.55	9.93	6.87591	1.9213	1.67	35.453	3.16	3.36	7.61288	1.2107	1.73	2.34	0.61	59.4136	0.429652	11.5
28.2725	24.8938	2.52851	0.234523	0.876708	2.02065	4.5	3.76022	2.65005	3.29598	4.2814	0.678737	1.08073	1.75947	0.943	19.1158	4.43641	3.27669	4.44999	7.72668	2.91218	1.52	39.0983	0.82	1.205	0.355631	1.11355	1.19	18.9984	3.98	1.2	7.82109	1.3053	1.84	78.96	2.55	9.93	7.0535	2.0343	1.73	3.16	1.43	18.3801	1.72106	63
28.2725	24.8938	2.52851	0.234523	0.876708	2.02065	4.5	3.76098	2.64991	3.29591	4.2814	0.677507	1.04393	1.72144	0.943	19.1158	4.43641	3.27669	4.44999	7.72668	2.91218	1.52	39.0983	0.82	1.205	0.363602	1.11354	1.19	18.9984	3.98	1.2	7.82109	1.3053	1.84	78.96	2.55	9.93	7.0535	2.0343	1.73	3.16	1.43	18.3801	1.72581	72.5
28.2725	24.8938	2.52851	0.234523	0.876708	2.02065	4.5	3.73762	2.64888	3.29578	4.2814	0.690611	1.25435	1.94496	0.943	19.1158	4.43641	3.27669	4.44999	7.72668	2.91218	1.52	39.0983	0.82	1.205	0.364584	1.11353	1.19	18.9984	3.98	1.2	7.82109	1.3053	1.84	78.96	2.55	9.93	7.0535	2.0343	1.73	3.16	1.43	18.3801	1.72156	94.5
28.2725	24.8938	2.52851	0.234523	0.876708	2.02065	4.5	3.73421	2.64888	3.29571	4.2814	0.689443	1.0872	1.77665	0.943	19.1158	4.43641	3.27669	4.44999	7.72668	2.91218	1.52	39.0983	0.82	1.205	0.371181	1.11354	1.19	18.9984	3.98	1.2	7.82109	1.3053	1.84	78.96	2.55	9.93	7.0535	2.0343	1.73	3.16	1.43	18.3801	1.72436	82.5
28.2725	24.8938	2.52851	0.234523	0.876708	2.02065	5	3.72521	2.65743	3.28404	4.2814	0.706073	1.03383	1.7399	0.943	19.1158	4.43641	3.27669	4.44999	7.72668	2.91218	1.52	39.0983	0.82	1.205	0.36048	1.11259	1.19	18.9984	3.98	1.2	7.82109	1.3053	1.84	78.96	2.55	9.93	7.0535	2.0343	1.73	3.16	1.43	18.3801	1.79881	74
28.2725	24.8938	2.52851	0.234523	0.876708	2.02065	4.5	3.73726	2.65021	3.29572	4.2814	0.689959	1.2547	1.94466	0.943	19.1158	4.43641	3.27669	4.44999	7.72668	2.91218	1.52	39.0983	0.82	1.205	0.356171	1.11354	1.19	18.9984	3.98	1.2	7.82109	1.3053	1.84	78.96	2.55	9.93	7.0535	2.0343	1.73	3.16	1.43	18.3801	1.71966	92
28.2725	24.8938	2.52851	0.234523	0.876708	2.02065	5	3.78657	2.6564	3.28385	4.2814	0.669875	1.20718	1.87705	0.943	19.1158	4.43641	3.27669	4.44999	7.72668	2.91218	1.52	39.0983	0.82	1.205	0.368059	1.11259	1.19	18.9984	3.98	1.2	7.82109	1.3053	1.84	78.96	2.55	9.93	7.0535	2.0343	1.73	3.16	1.43	18.3801	1.79701	71.5
28.2725	24.8938	2.52851	0.234523	0.876708	2.02065	4.5	3.73279	2.65008	3.29565	4.2814	0.691337	1.08339	1.77472	0.943	19.1158	4.43641	3.27669	4.44999	7.72668	2.91218	1.52	39.0983	0.82	1.205	0.364143	1.11353	1.19	18.9984	3.98	1.2	7.82109	1.3053	1.84	78.96	2.55	9.93	7.0535	2.0343	1.73	3.16	1.43	18.3801	1.72751	89.5
28.2725	24.8938	2.52851	0.234523	0.876708	2.02065	5	3.78671	2.65626	3.28384	4.2814	0.675947	1.20048	1.87643	0.943	19.1158	4.43641	3.27669	4.44999	7.72668	2.91218	1.52	39.0983	0.82	1.205	0.369434	1.11258	1.19	18.9984	3.98	1.2	7.82109	1.3053	1.84	78.96	2.55	9.93	7.0535	2.0343	1.73	3.16	1.43	18.3801	1.79726	73
28.2725	24.8938	2.52851	0.234523	0.876708	2.02065	4.5	3.76105	2.64905	3.29552	4.2814	0.678638	1.0764	1.75504	0.943	19.1158	4.43641	3.27669	4.44999	7.72668	2.91218	1.52	39.0983	0.82	1.205	0.365125	1.11353	1.19	18.9984	3.98	1.2	7.82109	1.3053	1.84	78.96	2.55	9.93	7.0535	2.0343	1.73	3.16	1.43	18.3801	1.72016	65
28.2725	24.8938	2.52851	0.234523	0.876708	2.02065	4.5	3.76067	2.64905	3.29545	4.2814	0.675945	1.03946	1.7154	0.943	19.1158	4.43641	3.27669	4.44999	7.72668	2.91218	1.52	39.0983	0.82	1.205	0.371722	1.11353	1.19	18.9984	3.98	1.2	7.82109	1.3053	1.84	78.96	2.55	9.93	7.0535	2.0343	1.73	3.16	1.43	18.3801	1.72606	73
28.2725	24.8938	2.52851	0.234523	0.876708	2.02065	5	3.72645	2.65523	3.28364	4.2814	0.704593	1.0371	1.7417	0.943	19.1158	4.43641	3.27669	4.44999	7.72668	2.91218	1.52	39.0983	0.82	1.205	0.377013	1.11258	1.19	18.9984	3.98	1.2	7.82109	1.3053	1.84	78.96	2.55	9.93	7.0535	2.0343	1.73	3.16	1.43	18.3801	1.79546	69
42.3485	39.1972	2.16654	0.270126	0.786162	2.20366	4.5	4.26683	3.08538	3.60408	4.8568	0.529518	1.04637	1.57588	0.532	12.8668	3.84096	2.93404	4.92874	7.86278	3.96289	1.52	39.0983	0.82	1.045	0.490577	1.06761	1.7	32.065	2.58	8.36	6.90959	2.0212	2.06	126.904	2.66	6.66	7.47868	1.1927	1.76	1.84	0.08	33.2081	0.47439	153
42.3485	39.1972	2.16654	0.270126	0.786162	2.20366	4.5	4.45012	3.08552	3.60596	4.8568	0.443806	1.48195	1.92575	0.532	12.8668	3.84096	2.93404	4.92874	7.86278	3.96289	1.52	39.0983	0.82	1.045	0.494228	1.06789	1.7	32.065	2.58	8.36	6.90959	2.0212	2.06	126.904	2.66	6.66	7.47868	1.1927	1.76	1.84	0.08	33.2081	0.46274	80.5
42.3485	39.1972	2.16654	0.270126	0.786162	2.20366	4.5	4.45844	3.08567	3.6042	4.8568	0.434151	1.12178	1.55593	0.532	12.8668	3.84096	2.93404	4.92874	7.86278	3.96289	1.52	39.0983	0.82	1.045	0.574541	1.06762	1.7	32.065	2.58	8.36	6.90959	2.0212	2.06	126.904	2.66	6.66	7.47868	1.1927	1.76	1.84	0.08	33.2081	0.47084	142
42.3485	39.1972	2.16654	0.270126	0.786162	2.20366	4.5	4.28361	3.08455	3.6052	4.8568	0.525819	1.20712	1.73294	0.532	12.8668	3.84096	2.93404	4.92874	7.86278	3.96289	1.52	39.0983	0.82	1.045	0.484863	1.06774	1.7	32.065	2.58	8.36	6.90959	2.0212	2.06	126.904	2.66	6.66	7.47868	1.1927	1.76	1.84	0.08	33.2081	0.459591	72
42.3485	39.1972	2.16654	0.270126	0.786162	2.20366	5	4.34921	3.08626	3.61637	4.8568	0.494534	1.00028	1.49482	0.532	12.8668	3.84096	2.93404	4.92874	7.86278	3.96289	1.52	39.0983	0.82	1.045	0.55192	1.07837	1.7	32.065	2.58	8.36	6.90959	2.0212	2.06	126.904	2.66	6.66	7.47868	1.1927	1.76	1.84	0.08	33.2081	0.479241	87
42.3485	39.1972	2.16654	0.270126	0.786162	2.20366	4.5	4.46008	3.08497	3.60513	4.8568	0.431657	1.12211	1.55377	0.532	12.8668	3.84096	2.93404	4.92874	7.86278	3.96289	1.52	39.0983	0.82	1.045	0.498015	1.06761	1.7	32.065	2.58	8.36	6.90959	2.0212	2.06	126.904	2.66	6.66	7.47868	1.1927	1.76	1.84	0.08	33.2081	0.47239	135.5
42.3485	39.1972	2.16654	0.270126	0.786162	2.20366	5	4.3868	3.08529	3.6156	4.8568	0.475424	1.3533	1.82872	0.532	12.8668	3.84096	2.93404	4.92874	7.86278	3.96289	1.52	39.0983	0.82	1.045	0.542555	1.07822	1.7	32.065	2.58	8.36	6.90959	2.0212	2.06	126.904	2.66	6.66	7.47868	1.1927	1.76	1.84	0.08	33.2081	0.47809	70.5
42.3485	39.1972	2.16654	0.270126	0.786162	2.20366	4.5	4.28672	3.08511	3.60701	4.8568	0.524323	1.20887	1.7332	0.532	12.8668	3.84096	2.93404	4.92874	7.86278	3.96289	1.52	39.0983	0.82	1.045	0.501665	1.06789	1.7	32.065	2.58	8.36	6.90959	2.0212	2.06	126.904	2.66	6.66	7.47868	1.1927	1.76	1.84	0.08	33.2081	0.46124	68.5
42.3485	39.1972	2.16654	0.270126	0.786162	2.20366	5	4.38773	3.08655	3.61649	4.8568	0.47607	1.35428	1.83035	0.532	12.8668	3.84096	2.93404	4.92874	7.86278	3.96289	1.52	39.0983	0.82	1.045	0.565056	1.07838	1.7	32.065	2.58	8.36	6.90959	2.0212	2.06	126.904	2.66	6.66	7.47868	1.1927	1.76	1.84	0.08	33.2081	0.481291	69
42.3485	39.1972	2.16654	0.270126	0.786162	2.20366	4.5	4.26478	3.08526	3.60524	4.8568	0.529745	1.04702	1.57677	0.532	12.8668	3.84096	2.93404	4.92874	7.86278	3.96289	1.52	39.0983	0.82	1.045	0.511151	1.06762	1.7	32.065	2.58	8.36	6.90959	2.0212	2.06	126.904	2.66	6.66	7.47868	1.1927	1.76	1.84	0.08	33.2081	0.46884	152.5
42.3485	39.1972	2.16654	0.270126	0.786162	2.20366	4.5	4.4502	3.08415	3.60624	4.8568	0.441342	1.48036	1.92171	0.532	12.8668	3.84096	2.93404	4.92874	7.86278	3.96289	1.52	39.0983	0.82	1.045	0.4923	1.06774	1.7	32.065	2.58	8.36	6.90959	2.0212	2.06	126.904	2.66	6.66	7.47868	1.1927	1.76	1.84	0.08	33.2081	0.458091	85
42.3485	39.1972	2.16654	0.270126	0.786162	2.20366	5	4.34858	3.08558	3.61572	4.8568	0.493218	1.00167	1.49489	0.532	12.8668	3.84096	2.93404	4.92874	7.86278	3.96289	1.52	39.0983	0.82	1.045	0.55569	1.07823	1.7	32.065	2.58	8.36	6.90959	2.0212	2.06	126.904	2.66	6.66	7.47868	1.1927	1.76	1.84	0.08	33.2081	0.480141	84
39.2112	38.8567	1.9418	0.23377	0.733459	2.5598	4	4.54978	3.08459	3.36925	4.6742	0.394912	1.52871	1.92362	0.467	13.6482	3.93265	2.79539	3.78687	6.58226	3.50474	1.52	39.0983	0.82	1.045	0.438541	1.04821	1.7	32.065	2.58	8.36	6.9747	1.9528	1.82	79.904	2.96	4.54	7.62115	1.1937	1.76	2.14	0.38	51.4253	0.359741	101
39.2112	38.8567	1.9418	0.23377	0.733459	2.5598	4	4.55383	3.08625	3.368	4.6742	0.383318	1.21556	1.59888	0.467	13.6482	3.93265	2.79539	3.78687	6.58226	3.50474	1.52	39.0983	0.82	1.045	0.501116	1.04622	1.7	32.065	2.58	8.36	6.9747	1.9528	1.82	79.904	2.96	4.54	7.62115	1.1937	1.76	2.14	0.38	51.4253	0.411191	133.5
39.2112	38.8567	1.9418	0.23377	0.733459	2.5598	4	4.2112	3.0872	3.37191	4.6742	0.564148	1.33052	1.89467	0.467	13.6482	3.93265	2.79539	3.78687	6.58226	3.50474	1.52	39.0983	0.82	1.045	0.442626	1.04679	1.7	32.065	2.58	8.36	6.9747	1.9528	1.82	79.904	2.96	4.54	7.62115	1.1937	1.76	2.14	0.38	51.4253	0.360341	43
39.2112	38.8567	1.9418	0.23377	0.733459	2.5598	4	4.27409	3.0611	3.36416	4.6742	0.502764	0.974076	1.47684	0.467	13.6482	3.93265	2.79539	3.78687	6.58226	3.50474	1.52	39.0983	0.82	1.045	0.491866	1.05353	1.7	32.065	2.58	8.36	6.9747	1.9528	1.82	79.904	2.96	4.54	7.62115	1.1937	1.76	2.14	0.38	51.4253	0.310341	82
39.2112	38.8567	1.9418	0.23377	0.733459	2.5598	4	4.49731	3.08321	3.36681	4.6742	0.4158	1.16783	1.58363	0.467	13.6482	3.93265	2.79539	3.78687	6.58226	3.50474	1.52	39.0983	0.82	1.045	0.474633	1.04848	1.7	32.065	2.58	8.36	6.9747	1.9528	1.82	79.904	2.96	4.54	7.62115	1.1937	1.76	2.14	0.38	51.4253	0.40729	151
39.2112	38.8567	1.9418	0.23377	0.733459	2.5598	4	4.36572	3.06371	3.36682	4.6742	0.420386	1.50382	1.92421	0.467	13.6482	3.93265	2.79539	3.78687	6.58226	3.50474	1.52	39.0983	0.82	1.045	0.495951	1.05212	1.7	32.065	2.58	8.36	6.9747	1.9528	1.82	79.904	2.96	4.54	7.62115	1.1937	1.76	2.14	0.38	51.4253	0.311991	85.5
39.2112	38.8567	1.9418	0.23377	0.733459	2.5598	4	4.21868	3.08417	3.36856	4.6742	0.566989	1.29382	1.86081	0.467	13.6482	3.93265	2.79539	3.78687	6.58226	3.50474	1.52	39.0983	0.82	1.045	0.440097	1.04811	1.7	32.065	2.58	8.36	6.9747	1.9528	1.82	79.904	2.96	4.54	7.62115	1.1937	1.76	2.14	0.38	51.4253	0.36094	48.5
39.2112	38.8567	1.9418	0.23377	0.733459	2.5598	4	4.37709	3.06372	3.36467	4.6742	0.45534	1.39322	1.84856	0.467	13.6482	3.93265	2.79539	3.78687	6.58226	3.50474	1.52	39.0983	0.82	1.045	0.479223	1.05118	1.7	32.065	2.58	8.36	6.9747	1.9528	1.82	79.904	2.96	4.54	7.62115	1.1937	1.76	2.14	0.38	51.4253	0.308991	88
39.2112	38.8567	1.9418	0.23377	0.733459	2.5598	4	4.51301	3.08677	3.37122	4.6742	0.419677	1.53733	1.95701	0.467	13.6482	3.93265	2.79539	3.78687	6.58226	3.50474	1.52	39.0983	0.82	1.045	0.444182	1.0467	1.7	32.065	2.58	8.36	6.9747	1.9528	1.82	79.904	2.96	4.54	7.62115	1.1937	1.76	2.14	0.38	51.4253	0.36154	110
39.2112	38.8567	1.9418	0.23377	0.733459	2.5598	4	4.2682	3.06632	3.36732	4.6742	0.504052	0.91774	1.42179	0.467	13.6482	3.93265	2.79539	3.78687	6.58226	3.50474	1.52	39.0983	0.82	1.045	0.483308	1.04977	1.7	32.065	2.58	8.36	6.9747	1.9528	1.82	79.904	2.96	4.54	7.62115	1.1937	1.76	2.14	0.38	51.4253	0.31064	92
36.8329	38.4415	1.66638	0.217678	0.700519	2.59226	4	4.92631	3.08119	3.15705	4.3739	0.190867	1.30723	1.4981	0.834	13.9758	4.1443	2.73755	10.3231	13.0606	3.22502	1.52	39.0983	0.82	1.045	0.574541	1.03847	1.7	32.065	2.58	8.36	6.90959	1.9331	1.67	35.453	3.16	3.36	7.47868	1.1879	1.76	2.34	0.58	57.6978	0.649875	224
36.8329	38.4415	1.66638	0.217678	0.700519	2.59226	4	4.14056	3.08111	3.15709	4.3739	0.581929	1.42293	2.00486	0.834	13.9758	4.1443	2.73755	10.3231	13.0606	3.22502	1.52	39.0983	0.82	1.045	0.484863	1.03853	1.7	32.065	2.58	8.36	6.90959	1.9331	1.67	35.453	3.16	3.36	7.47868	1.1879	1.76	2.34	0.58	57.6978	0.499924	39
36.8329	38.4415	1.66638	0.217678	0.700519	2.59226	4	4.37815	3.09087	3.17791	4.3739	0.501365	1.41708	1.91845	0.834	13.9758	4.1443	2.73755	10.3231	13.0606	3.22502	1.52	39.0983	0.82	1.045	0.55192	1.04417	1.7	32.065	2.58	8.36	6.90959	1.9331	1.67	35.453	3.16	3.36	7.47868	1.1879	1.76	2.34	0.58	57.6978	0.532875	66
36.8329	38.4415	1.66638	0.217678	0.700519	2.59226	4	4.01451	3.08557	3.16547	4.3739	0.205282	1.43789	1.64317	0.834	13.9758	4.1443	2.73755	10.3231	13.0606	3.22502	1.52	39.0983	0.82	1.045	0.542555	1.04038	1.7	32.065	2.58	8.36	6.90959	1.9331	1.67	35.453	3.16	3.36	7.47868	1.1879	1.76	2.34	0.58	57.6978	0.670175	194.5
36.8329	38.4415	1.66638	0.217678	0.700519	2.59226	4	4.01829	3.0812	3.15718	4.3739	0.72204	0.871645	1.59369	0.834	13.9758	4.1443	2.73755	10.3231	13.0606	3.22502	1.52	39.0983	0.82	1.045	0.511151	1.03844	1.7	32.065	2.58	8.36	6.90959	1.9331	1.67	35.453	3.16	3.36	7.47868	1.1879	1.76	2.34	0.58	57.6978	0.651424	141.5
36.8329	38.4415	1.66638	0.217678	0.700519	2.59226	4	4.30798	3.08112	3.15722	4.3739	0.560572	1.37589	1.93646	0.834	13.9758	4.1443	2.73755	10.3231	13.0606	3.22502	1.52	39.0983	0.82	1.045	0.4923	1.0385	1.7	32.065	2.58	8.36	6.90959	1.9331	1.67	35.453	3.16	3.36	7.47868	1.1879	1.76	2.34	0.58	57.6978	0.499775	27.5
27.2999	25.4796	2.04811	0.202479	0.840179	2.54724	4.5	3.75992	2.65087	3.12812	4.1367	0.714593	1.02236	1.73695	1.165	20.6852	4.69388	2.97665	5.73442	8.71107	2.5886	1.52	39.0983	0.82	1.045	0.331232	1.08785	1.19	18.9984	3.98	1.2	7.86249	1.26	1.7	32.065	2.58	8.36	7.14235	2.0066	1.76	3.16	1.4	27.3249	1.70474	22.5
27.2999	25.4796	2.04811	0.202479	0.840179	2.54724	4.5	3.80976	2.65087	3.12812	4.1367	0.653421	1.01483	1.66826	1.165	20.6852	4.69388	2.97665	5.73442	8.71107	2.5886	1.52	39.0983	0.82	1.045	0.329178	1.08793	1.19	18.9984	3.98	1.2	7.86249	1.26	1.7	32.065	2.58	8.36	7.14235	2.0066	1.76	3.16	1.4	27.3249	1.76994	122.5
27.2999	25.4796	2.04811	0.202479	0.840179	2.54724	4.5	3.81144	2.65099	3.12807	4.1367	0.688749	1.39699	2.08573	1.165	20.6852	4.69388	2.97665	5.73442	8.71107	2.5886	1.52	39.0983	0.82	1.045	0.333307	1.0878	1.19	18.9984	3.98	1.2	7.86249	1.26	1.7	32.065	2.58	8.36	7.14235	2.0066	1.76	3.16	1.4	27.3249	1.70284	78
27.2999	25.4796	2.04811	0.202479	0.840179	2.54724	4.5	3.6878	2.65099	3.12807	4.1367	0.714561	0.992958	1.70752	1.165	20.6852	4.69388	2.97665	5.73442	8.71107	2.5886	1.52	39.0983	0.82	1.045	0.331884	1.08781	1.19	18.9984	3.98	1.2	7.86249	1.26	1.7	32.065	2.58	8.36	7.14235	2.0066	1.76	3.16	1.4	27.3249	1.76954	255
27.2999	25.4796	2.04811	0.202479	0.840179	2.54724	5	3.85584	2.67028	3.13099	4.1367	0.694296	0.937662	1.63196	1.165	20.6852	4.69388	2.97665	5.73442	8.71107	2.5886	1.52	39.0983	0.82	1.045	0.308141	1.0911	1.19	18.9984	3.98	1.2	7.86249	1.26	1.7	32.065	2.58	8.36	7.14235	2.0066	1.76	3.16	1.4	27.3249	1.76224	133
27.2999	25.4796	2.04811	0.202479	0.840179	2.54724	4.5	3.81136	2.65087	3.12812	4.1367	0.6893	1.39708	2.08638	1.165	20.6852	4.69388	2.97665	5.73442	8.71107	2.5886	1.52	39.0983	0.82	1.045	0.333291	1.08778	1.19	18.9984	3.98	1.2	7.86249	1.26	1.7	32.065	2.58	8.36	7.14235	2.0066	1.76	3.16	1.4	27.3249	1.70529	72
27.2999	25.4796	2.04811	0.202479	0.840179	2.54724	5	3.7687	2.6704	3.13095	4.1367	0.737511	1.20771	1.94522	1.165	20.6852	4.69388	2.97665	5.73442	8.71107	2.5886	1.52	39.0983	0.82	1.045	0.310847	1.09099	1.19	18.9984	3.98	1.2	7.86249	1.26	1.7	32.065	2.58	8.36	7.14235	2.0066	1.76	3.16	1.4	27.3249	1.76579	44.5
27.2999	25.4796	2.04811	0.202479	0.840179	2.54724	4.5	3.68775	2.65087	3.12812	4.1367	0.714828	0.992287	1.70711	1.165	20.6852	4.69388	2.97665	5.73442	8.71107	2.5886	1.52	39.0983	0.82	1.045	0.331237	1.08786	1.19	18.9984	3.98	1.2	7.86249	1.26	1.7	32.065	2.58	8.36	7.14235	2.0066	1.76	3.16	1.4	27.3249	1.76674	253
27.2999	25.4796	2.04811	0.202479	0.840179	2.54724	5	3.7687	2.6704	3.13095	4.1367	0.737755	1.20658	1.94433	1.165	20.6852	4.69388	2.97665	5.73442	8.71107	2.5886	1.52	39.0983	0.82	1.045	0.310215	1.09106	1.19	18.9984	3.98	1.2	7.86249	1.26	1.7	32.065	2.58	8.36	7.14235	2.0066	1.76	3.16	1.4	27.3249	1.77704	40.5
27.2999	25.4796	2.04811	0.202479	0.840179	2.54724	4.5	3.7604	2.65098	3.12807	4.1367	0.714662	1.02157	1.73623	1.165	20.6852	4.69388	2.97665	5.73442	8.71107	2.5886	1.52	39.0983	0.82	1.045	0.335365	1.08774	1.19	18.9984	3.98	1.2	7.86249	1.26	1.7	32.065	2.58	8.36	7.14235	2.0066	1.76	3.16	1.4	27.3249	1.70339	27.5
27.2999	25.4796	2.04811	0.202479	0.840179	2.54724	4.5	3.80982	2.65098	3.12807	4.1367	0.653964	1.01415	1.66812	1.165	20.6852	4.69388	2.97665	5.73442	8.71107	2.5886	1.52	39.0983	0.82	1.045	0.333943	1.08774	1.19	18.9984	3.98	1.2	7.86249	1.26	1.7	32.065	2.58	8.36	7.14235	2.0066	1.76	3.16	1.4	27.3249	1.76634	116.5
27.2999	25.4796	2.04811	0.202479	0.840179	2.54724	5	3.85607	2.67051	3.1309	4.1367	0.694245	0.938221	1.63247	1.165	20.6852	4.69388	2.97665	5.73442	8.71107	2.5886	1.52	39.0983	0.82	1.045	0.312922	1.09095	1.19	18.9984	3.98	1.2	7.86249	1.26	1.7	32.065	2.58	8.36	7.14235	2.0066	1.76	3.16	1.4	27.3249	1.78059	121
31.0374	25.8645	2.78419	0.289952	0.910591	2.0488	6	3.79988	2.68692	3.79988	4.65389	0.639943	1.2308	1.87074	1.4	18.7209	3.13016	3.2172	5.33834	8.55554	3.14894	1.52	39.0983	0.82	1.055	0.246651	1.13855	1.26	15.9994	3.44	3.06	7.44708	2.24356	2.06	126.904	2.66	6.66	7.81285	1.17209	2.62	1.84	0.78	-38.0032	1.42104	122
29.272	24.3933	2.41886	0.229787	0.849546	2.56837	6	3.72642	2.63498	3.72642	4.56392	0.603212	1.40718	2.01039	1.102	19.6892	3.21435	2.94478	6.53049	9.47527	2.74845	1.52	39.0983	0.82	1.055	0.236565	1.13868	1.26	15.9994	3.44	3.06	7.43829	2.18597	1.82	79.904	2.96	4.54	7.85114	1.23008	2.62	2.14	0.48	-17.1245	0.772331	87
27.9179	25.0345	2.0074	0.199788	0.811392	2.61933	4.5	3.7136	2.65365	3.21765	4.2632	0.641569	1.22424	1.86581	0.804	20.6125	3.14007	2.77937	14.5526	17.332	2.48136	1.52	39.0983	0.82	1.055	0.341089	1.09075	1.26	15.9994	3.44	3.06	7.28411	2.0768	1.67	35.453	3.16	3.36	7.71291	1.1967	2.62	2.34	0.28	-1.74259	1.0626	72
27.9179	25.0345	2.0074	0.199788	0.811392	2.61933	4.5	3.69856	2.65559	3.21127	4.2632	0.645857	1.15191	1.79777	0.804	20.6125	3.14007	2.77937	14.5526	17.332	2.48136	1.52	39.0983	0.82	1.055	0.33658	1.09019	1.26	15.9994	3.44	3.06	7.28411	2.0768	1.67	35.453	3.16	3.36	7.71291	1.1967	2.62	2.34	0.28	-1.74259	1.0878	99
27.9179	25.0345	2.0074	0.199788	0.811392	2.61933	4.5	3.80386	2.65384	3.21639	4.2632	0.59599	1.42436	2.02035	0.804	20.6125	3.14007	2.77937	14.5526	17.332	2.48136	1.52	39.0983	0.82	1.055	0.33711	1.09073	1.26	15.9994	3.44	3.06	7.28411	2.0768	1.67	35.453	3.16	3.36	7.71291	1.1967	2.62	2.34	0.28	-1.74259	1.0621	87
27.9179	25.0345	2.0074	0.199788	0.811392	2.61933	4.5	3.81317	2.65554	3.21117	4.2632	0.588458	1.15933	1.74779	0.804	20.6125	3.14007	2.77937	14.5526	17.332	2.48136	1.52	39.0983	0.82	1.055	0.332346	1.09015	1.26	15.9994	3.44	3.06	7.28411	2.0768	1.67	35.453	3.16	3.36	7.71291	1.1967	2.62	2.34	0.28	-1.74259	1.0915	85
27.9179	25.0345	2.0074	0.199788	0.811392	2.61933	5	3.77748	2.65854	3.21896	4.2632	0.616813	1.33248	1.9493	0.804	20.6125	3.14007	2.77937	14.5526	17.332	2.48136	1.52	39.0983	0.82	1.055	0.326577	1.09364	1.26	15.9994	3.44	3.06	7.28411	2.0768	1.67	35.453	3.16	3.36	7.71291	1.1967	2.62	2.34	0.28	-1.74259	1.09415	90
27.9179	25.0345	2.0074	0.199788	0.811392	2.61933	4.5	3.80148	2.65353	3.21803	4.2632	0.597672	1.42692	2.02459	0.804	20.6125	3.14007	2.77937	14.5526	17.332	2.48136	1.52	39.0983	0.82	1.055	0.342342	1.09081	1.26	15.9994	3.44	3.06	7.28411	2.0768	1.67	35.453	3.16	3.36	7.71291	1.1967	2.62	2.34	0.28	-1.74259	1.063	88
27.9179	25.0345	2.0074	0.199788	0.811392	2.61933	5	3.74627	2.65849	3.21885	4.2632	0.6287	1.09777	1.72647	0.804	20.6125	3.14007	2.77937	14.5526	17.332	2.48136	1.52	39.0983	0.82	1.055	0.322344	1.0936	1.26	15.9994	3.44	3.06	7.28411	2.0768	1.67	35.453	3.16	3.36	7.71291	1.1967	2.62	2.34	0.28	-1.74259	1.0991	79.5
27.9179	25.0345	2.0074	0.199788	0.811392	2.61933	4.5	3.81175	2.65547	3.21166	4.2632	0.589284	1.15889	1.74817	0.804	20.6125	3.14007	2.77937	14.5526	17.332	2.48136	1.52	39.0983	0.82	1.055	0.337834	1.09025	1.26	15.9994	3.44	3.06	7.28411	2.0768	1.67	35.453	3.16	3.36	7.71291	1.1967	2.62	2.34	0.28	-1.74259	1.0855	91
27.9179	25.0345	2.0074	0.199788	0.811392	2.61933	5	3.74704	2.65873	3.2177	4.2632	0.628702	1.09864	1.72734	0.804	20.6125	3.14007	2.77937	14.5526	17.332	2.48136	1.52	39.0983	0.82	1.055	0.329589	1.09362	1.26	15.9994	3.44	3.06	7.28411	2.0768	1.67	35.453	3.16	3.36	7.71291	1.1967	2.62	2.34	0.28	-1.74259	1.0975	82.5
27.9179	25.0345	2.0074	0.199788	0.811392	2.61933	4.5	3.71383	2.65371	3.21678	4.2632	0.64105	1.22597	1.86702	0.804	20.6125	3.14007	2.77937	14.5526	17.332	2.48136	1.52	39.0983	0.82	1.055	0.345355	1.09079	1.26	15.9994	3.44	3.06	7.28411	2.0768	1.67	35.453	3.16	3.36	7.71291	1.1967	2.62	2.34	0.28	-1.74259	1.0625	71
27.9179	25.0345	2.0074	0.199788	0.811392	2.61933	4.5	3.69698	2.65542	3.21156	4.2632	0.646574	1.15224	1.79881	0.804	20.6125	3.14007	2.77937	14.5526	17.332	2.48136	1.52	39.0983	0.82	1.055	0.3336	1.09021	1.26	15.9994	3.44	3.06	7.28411	2.0768	1.67	35.453	3.16	3.36	7.71291	1.1967	2.62	2.34	0.28	-1.74259	1.0892	93.5
27.9179	25.0345	2.0074	0.199788	0.811392	2.61933	5	3.77734	2.65868	3.2176	4.2632	0.616372	1.33437	1.95074	0.804	20.6125	3.14007	2.77937	14.5526	17.332	2.48136	1.52	39.0983	0.82	1.055	0.325356	1.09358	1.26	15.9994	3.44	3.06	7.28411	2.0768	1.67	35.453	3.16	3.36	7.71291	1.1967	2.62	2.34	0.28	-1.74259	1.10245	93
22.9977	24.4096	2.19925	0.134256	0.689302	2.66809	4	4.27873	2.63041	2.67622	3.7174	0.337015	1.29053	1.62754	1.227	24	3.60605	2.74857	5.95591	8.70448	2.0217	1.52	39.0983	0.82	1.055	0.357576	1.05772	1.26	15.9994	3.44	3.06	7.25898	1.9799	1.19	18.9984	3.98	1.2	7.83786	1.1951	2.62	3.16	0.54	30.1244	1.48375	239.5
22.9977	24.4096	2.19925	0.134256	0.689302	2.66809	4	3.52276	2.63041	2.67622	3.7174	0.693611	1.43356	2.12717	1.227	24	3.60605	2.74857	5.95591	8.70448	2.0217	1.52	39.0983	0.82	1.055	0.311692	1.05737	1.26	15.9994	3.44	3.06	7.25898	1.9799	1.19	18.9984	3.98	1.2	7.83786	1.1951	2.62	3.16	0.54	30.1244	1.2964	54
22.9977	24.4096	2.19925	0.134256	0.689302	2.66809	4	3.76379	2.64992	2.70089	3.7174	0.639753	1.45284	2.09259	1.227	24	3.60605	2.74857	5.95591	8.70448	2.0217	1.52	39.0983	0.82	1.055	0.269053	1.06001	1.26	15.9994	3.44	3.06	7.25898	1.9799	1.19	18.9984	3.98	1.2	7.83786	1.1951	2.62	3.16	0.54	30.1244	1.3467	31.5
22.9977	24.4096	2.19925	0.134256	0.689302	2.66809	4	3.46411	2.63043	2.67622	3.7174	0.858705	0.942103	1.80081	1.227	24	3.60605	2.74857	5.95591	8.70448	2.0217	1.52	39.0983	0.82	1.055	0.302646	1.05768	1.26	15.9994	3.44	3.06	7.25898	1.9799	1.19	18.9984	3.98	1.2	7.83786	1.1951	2.62	3.16	0.54	30.1244	1.4835	197
22.9977	24.4096	2.19925	0.134256	0.689302	2.66809	4	3.68042	2.63043	2.67622	3.7174	0.710808	1.35826	2.06907	1.227	24	3.60605	2.74857	5.95591	8.70448	2.0217	1.52	39.0983	0.82	1.055	0.304843	1.05733	1.26	15.9994	3.44	3.06	7.25898	1.9799	1.19	18.9984	3.98	1.2	7.83786	1.1951	2.62	3.16	0.54	30.1244	1.29695	32
32.0397	29.796	2.8488	0.391463	0.758961	1.89948	4	3.84615	2.8235	3.22952	4.5049	0.230677	0.80232	1.033	0.634	17.5752	4.38934	3.46124	10.5374	13.9986	3.44716	1.16	22.9897	0.93	0.2335	0.20518	1.04473	1.84	78.96	2.55	8.84	7.49995	1.8361	2.06	126.904	2.66	6.35	7.88416	1.2982	1.62	1.73	0.11	41.3774	0.295188	99.5
32.0397	29.796	2.8488	0.391463	0.758961	1.89948	4	4.07703	2.82259	3.22802	4.5049	0.113247	1.082	1.19525	0.634	17.5752	4.38934	3.46124	10.5374	13.9986	3.44716	1.16	22.9897	0.93	0.2335	0.205317	1.04458	1.84	78.96	2.55	8.84	7.49995	1.8361	2.06	126.904	2.66	6.35	7.88416	1.2982	1.62	1.73	0.11	41.3774	0.269168	78
32.0397	29.796	2.8488	0.391463	0.758961	1.89948	4	4.14258	2.82363	3.2307	4.5049	0.0832468	0.851115	0.934362	0.634	17.5752	4.38934	3.46124	10.5374	13.9986	3.44716	1.16	22.9897	0.93	0.2335	0.20512	1.04488	1.84	78.96	2.55	8.84	7.49995	1.8361	2.06	126.904	2.66	6.35	7.88416	1.2982	1.62	1.73	0.11	41.3774	0.295018	99.5
32.0397	29.796	2.8488	0.391463	0.758961	1.89948	4	3.91375	2.82284	3.23009	4.5049	0.195375	1.03154	1.22691	0.634	17.5752	4.38934	3.46124	10.5374	13.9986	3.44716	1.16	22.9897	0.93	0.2335	0.205485	1.04452	1.84	78.96	2.55	8.84	7.49995	1.8361	2.06	126.904	2.66	6.35	7.88416	1.2982	1.62	1.73	0.11	41.3774	0.268818	115.5
32.0397	29.796	2.8488	0.391463	0.758961	1.89948	4	3.92005	2.80992	3.23631	4.5049	0.175923	0.698144	0.874066	0.634	17.5752	4.38934	3.46124	10.5374	13.9986	3.44716	1.16	22.9897	0.93	0.2335	0.204894	1.04475	1.84	78.96	2.55	8.84	7.49995	1.8361	2.06	126.904	2.66	6.35	7.88416	1.2982	1.62	1.73	0.11	41.3774	0.269398	77
32.0397	29.796	2.8488	0.391463	0.758961	1.89948	4	4.13804	2.82388	3.23116	4.5049	0.0844203	0.855952	0.940372	0.634	17.5752	4.38934	3.46124	10.5374	13.9986	3.44716	1.16	22.9897	0.93	0.2335	0.205114	1.0451	1.84	78.96	2.55	8.84	7.49995	1.8361	2.06	126.904	2.66	6.35	7.88416	1.2982	1.62	1.73	0.11	41.3774	0.295018	99.5
32.0397	29.796	2.8488	0.391463	0.758961	1.89948	4	4.04428	2.81017	3.23838	4.5049	0.113974	1.09156	1.20553	0.634	17.5752	4.38934	3.46124	10.5374	13.9986	3.44716	1.16	22.9897	0.93	0.2335	0.205061	1.04469	1.84	78.96	2.55	8.84	7.49995	1.8361	2.06	126.904	2.66	6.35	7.88416	1.2982	1.62	1.73	0.11	41.3774	0.271753	65
32.0397	29.796	2.8488	0.391463	0.758961	1.89948	4	3.9078	2.82297	3.22966	4.5049	0.197457	1.02258	1.22004	0.634	17.5752	4.38934	3.46124	10.5374	13.9986	3.44716	1.16	22.9897	0.93	0.2335	0.205252	1.04495	1.84	78.96	2.55	8.84	7.49995	1.8361	2.06	126.904	2.66	6.35	7.88416	1.2982	1.62	1.73	0.11	41.3774	0.268818	115.5
32.0397	29.796	2.8488	0.391463	0.758961	1.89948	4	4.03088	2.81005	3.23749	4.5049	0.121319	1.07858	1.1999	0.634	17.5752	4.38934	3.46124	10.5374	13.9986	3.44716	1.16	22.9897	0.93	0.2335	0.205075	1.0449	1.84	78.96	2.55	8.84	7.49995	1.8361	2.06	126.904	2.66	6.35	7.88416	1.2982	1.62	1.73	0.11	41.3774	0.268793	73
32.0397	29.796	2.8488	0.391463	0.758961	1.89948	4	3.84942	2.82401	3.23235	4.5049	0.229503	0.796175	1.02568	0.634	17.5752	4.38934	3.46124	10.5374	13.9986	3.44716	1.16	22.9897	0.93	0.2335	0.205296	1.04525	1.84	78.96	2.55	8.84	7.49995	1.8361	2.06	126.904	2.66	6.35	7.88416	1.2982	1.62	1.73	0.11	41.3774	0.295188	99.5
32.0397	29.796	2.8488	0.391463	0.758961	1.89948	4	4.06906	2.82322	3.23173	4.5049	0.117322	1.08758	1.2049	0.634	17.5752	4.38934	3.46124	10.5374	13.9986	3.44716	1.16	22.9897	0.93	0.2335	0.205419	1.04488	1.84	78.96	2.55	8.84	7.49995	1.8361	2.06	126.904	2.66	6.35	7.88416	1.2982	1.62	1.73	0.11	41.3774	0.269168	78
32.0397	29.796	2.8488	0.391463	0.758961	1.89948	4	3.91055	2.8103	3.23957	4.5049	0.181656	0.69036	0.872016	0.634	17.5752	4.38934	3.46124	10.5374	13.9986	3.44716	1.16	22.9897	0.93	0.2335	0.205243	1.04484	1.84	78.96	2.55	8.84	7.49995	1.8361	2.06	126.904	2.66	6.35	7.88416	1.2982	1.62	1.73	0.11	41.3774	0.271148	77
29.2969	29.458	2.5827	0.350525	0.702393	1.87455	4	4.08559	2.82047	2.9649	4.1755	0.104721	1.10412	1.20884	0.82	18.2712	4.41498	3.24225	4.75969	8.00194	2.99158	1.16	22.9897	0.93	0.2335	0.203374	1.01725	1.84	78.96	2.55	8.84	7.50219	1.78	1.82	79.904	2.96	4.28	7.88336	1.2565	1.62	2.03	0.41	60.1627	0.264171	184.5
29.2969	29.458	2.5827	0.350525	0.702393	1.87455	4	4.48022	2.82099	2.96544	4.1755	-0.109824	1.03516	0.925339	0.82	18.2712	4.41498	3.24225	4.75969	8.00194	2.99158	1.16	22.9897	0.93	0.2335	0.203485	1.01693	1.84	78.96	2.55	8.84	7.50219	1.78	1.82	79.904	2.96	4.28	7.88336	1.2565	1.62	2.03	0.41	60.1627	0.198596	73.5
29.2969	29.458	2.5827	0.350525	0.702393	1.87455	4	4.43253	2.81724	2.95563	4.1755	-0.073703	0.952801	0.879098	0.82	18.2712	4.41498	3.24225	4.75969	8.00194	2.99158	1.16	22.9897	0.93	0.2335	0.207558	1.00817	1.84	78.96	2.55	8.84	7.50219	1.78	1.82	79.904	2.96	4.28	7.88336	1.2565	1.62	2.03	0.41	60.1627	0.238486	132.5
29.2969	29.458	2.5827	0.350525	0.702393	1.87455	4	3.84913	2.81666	2.9557	4.1755	0.216678	1.14693	1.36361	0.82	18.2712	4.41498	3.24225	4.75969	8.00194	2.99158	1.16	22.9897	0.93	0.2335	0.20579	1.00792	1.84	78.96	2.55	8.84	7.50219	1.78	1.82	79.904	2.96	4.28	7.88336	1.2565	1.62	2.03	0.41	60.1627	0.173171	30
29.2969	29.458	2.5827	0.350525	0.702393	1.87455	4	3.99378	2.82308	2.96341	4.1755	0.169324	1.03761	1.20694	0.82	18.2712	4.41498	3.24225	4.75969	8.00194	2.99158	1.16	22.9897	0.93	0.2335	0.20289	1.01988	1.84	78.96	2.55	8.84	7.50219	1.78	1.82	79.904	2.96	4.28	7.88336	1.2565	1.62	2.03	0.41	60.1627	0.162836	30
29.2969	29.458	2.5827	0.350525	0.702393	1.87455	4	3.83385	2.82109	2.96476	4.1755	0.263245	0.582668	0.845913	0.82	18.2712	4.41498	3.24225	4.75969	8.00194	2.99158	1.16	22.9897	0.93	0.2335	0.203313	1.01766	1.84	78.96	2.55	8.84	7.50219	1.78	1.82	79.904	2.96	4.28	7.88336	1.2565	1.62	2.03	0.41	60.1627	0.263681	127
29.2969	29.458	2.5827	0.350525	0.702393	1.87455	4	4.40755	2.81874	2.95367	4.1755	-0.0825441	1.07256	0.990017	0.82	18.2712	4.41498	3.24225	4.75969	8.00194	2.99158	1.16	22.9897	0.93	0.2335	0.205196	1.01087	1.84	78.96	2.55	8.84	7.50219	1.78	1.82	79.904	2.96	4.28	7.88336	1.2565	1.62	2.03	0.41	60.1627	0.206346	94.5
29.2969	29.458	2.5827	0.350525	0.702393	1.87455	4	3.74438	2.82161	2.96531	4.1755	0.316906	0.69597	1.01288	0.82	18.2712	4.41498	3.24225	4.75969	8.00194	2.99158	1.16	22.9897	0.93	0.2335	0.203424	1.01734	1.84	78.96	2.55	8.84	7.50219	1.78	1.82	79.904	2.96	4.28	7.88336	1.2565	1.62	2.03	0.41	60.1627	0.198651	112
29.2969	29.458	2.5827	0.350525	0.702393	1.87455	4	3.69294	2.81985	2.95415	4.1755	0.326203	0.738438	1.06464	0.82	18.2712	4.41498	3.24225	4.75969	8.00194	2.99158	1.16	22.9897	0.93	0.2335	0.20528	1.0108	1.84	78.96	2.55	8.84	7.50219	1.78	1.82	79.904	2.96	4.28	7.88336	1.2565	1.62	2.03	0.41	60.1627	0.210006	55
29.2969	29.458	2.5827	0.350525	0.702393	1.87455	4	3.68963	2.81786	2.9555	4.1755	0.344755	0.6867	1.03145	0.82	18.2712	4.41498	3.24225	4.75969	8.00194	2.99158	1.16	22.9897	0.93	0.2335	0.205702	1.00859	1.84	78.96	2.55	8.84	7.50219	1.78	1.82	79.904	2.96	4.28	7.88336	1.2565	1.62	2.03	0.41	60.1627	0.237996	126
29.2969	29.458	2.5827	0.350525	0.702393	1.87455	4	3.94782	2.81728	2.95557	4.1755	0.204284	1.10672	1.31101	0.82	18.2712	4.41498	3.24225	4.75969	8.00194	2.99158	1.16	22.9897	0.93	0.2335	0.205729	1.00833	1.84	78.96	2.55	8.84	7.50219	1.78	1.82	79.904	2.96	4.28	7.88336	1.2565	1.62	2.03	0.41	60.1627	0.173226	30
29.2969	29.458	2.5827	0.350525	0.702393	1.87455	4	3.79699	2.81552	2.94441	4.1755	0.261826	0.547457	0.809283	0.82	18.2712	4.41498	3.24225	4.75969	8.00194	2.99158	1.16	22.9897	0.93	0.2335	0.207585	1.0018	1.84	78.96	2.55	8.84	7.50219	1.78	1.82	79.904	2.96	4.28	7.88336	1.2565	1.62	2.03	0.41	60.1627	0.253516	110
26.8295	28.928	2.26998	0.339948	0.667037	1.82075	4	4.755	2.8281	2.7763	4.0076	-0.2821	0.9802	0.698	1.015	18.2757	4.42778	3.18877	4.81807	8.00684	2.70184	1.16	22.9897	0.93	0.2335	0.201346	1.01894	1.84	78.96	2.55	8.84	7.50979	1.7806	1.67	35.453	3.16	3.14	7.88204	1.2655	1.62	2.23	0.61	68.8591	0.461333	125.5
26.8295	28.928	2.26998	0.339948	0.667037	1.82075	4	4.6587	2.8243	2.7859	4.0076	-0.1846	0.9578	0.7733	1.015	18.2757	4.42778	3.18877	4.81807	8.00684	2.70184	1.16	22.9897	0.93	0.2335	0.205425	1.01845	1.84	78.96	2.55	8.84	7.50979	1.7806	1.67	35.453	3.16	3.14	7.88204	1.2655	1.62	2.23	0.61	68.8591	0.511203	176
26.8295	28.928	2.26998	0.339948	0.667037	1.82075	4	3.7859	2.8245	2.7862	4.0076	0.2563	1.0028	1.2591	1.015	18.2757	4.42778	3.18877	4.81807	8.00684	2.70184	1.16	22.9897	0.93	0.2335	0.202256	1.01863	1.84	78.96	2.55	8.84	7.50979	1.7806	1.67	35.453	3.16	3.14	7.88204	1.2655	1.62	2.23	0.61	68.8591	0.353853	91
26.8295	28.928	2.26998	0.339948	0.667037	1.82075	4	4.0034	2.8246	2.7642	4.0076	0.1732	0.9826	1.1558	1.015	18.2757	4.42778	3.18877	4.81807	8.00684	2.70184	1.16	22.9897	0.93	0.2335	0.203633	1.00908	1.84	78.96	2.55	8.84	7.50979	1.7806	1.67	35.453	3.16	3.14	7.88204	1.2655	1.62	2.23	0.61	68.8591	0.442718	68
26.8295	28.928	2.26998	0.339948	0.667037	1.82075	4	3.58227	2.82433	2.78631	4.0076	0.443728	0.590728	1.03446	1.015	18.2757	4.42778	3.18877	4.81807	8.00684	2.70184	1.16	22.9897	0.93	0.2335	0.202191	1.01859	1.84	78.96	2.55	8.84	7.50979	1.7806	1.67	35.453	3.16	3.14	7.88204	1.2655	1.62	2.23	0.61	68.8591	0.510698	180.5
26.8295	28.928	2.26998	0.339948	0.667037	1.82075	4	3.90364	2.82448	2.78661	4.0076	0.261968	0.951488	1.21346	1.015	18.2757	4.42778	3.18877	4.81807	8.00684	2.70184	1.16	22.9897	0.93	0.2335	0.202179	1.01877	1.84	78.96	2.55	8.84	7.50979	1.7806	1.67	35.453	3.16	3.14	7.88204	1.2655	1.62	2.23	0.61	68.8591	0.354348	37
18.3376	15.281	3.02318	0.361583	0.90269	1.25989	6	3.1885	2.2546	3.1885	3.9051	0.40426	0.9213	1.32556	0.502	34.2244	4.59417	3.53942	9.3787	12.9181	2.00689	1.16	22.9897	0.93	0.2335	0.210043	1.09522	1.19	18.9984	3.98	1.02	7.83539	1.36313	1.84	78.96	2.55	8.84	7.53448	1.92435	1.62	3.05	1.43	28.8585	2.7935	76
29.4053	26.185	2.57437	0.389026	0.796113	1.77341	4.5	3.75608	2.69819	3.25661	4.4173	0.238538	0.913997	1.15254	0.553	19.9626	4.74351	3.34745	9.22861	12.5761	3.08168	1.16	22.9897	0.93	0.2585	0.203927	1.05485	1.7	32.065	2.58	6.99	7.50781	1.8918	2.06	126.904	2.66	6.35	7.88281	1.2783	1.65	1.73	0.08	27.0999	0.516598	98
29.4053	26.185	2.57437	0.389026	0.796113	1.77341	4.5	3.8798	2.69883	3.25351	4.4173	0.176395	1.01823	1.19463	0.553	19.9626	4.74351	3.34745	9.22861	12.5761	3.08168	1.16	22.9897	0.93	0.2585	0.203746	1.05495	1.7	32.065	2.58	6.99	7.50781	1.8918	2.06	126.904	2.66	6.35	7.88281	1.2783	1.65	1.73	0.08	27.0999	0.513123	102
29.4053	26.185	2.57437	0.389026	0.796113	1.77341	4.5	3.87077	2.69792	3.25989	4.4173	0.180658	0.816713	0.997371	0.553	19.9626	4.74351	3.34745	9.22861	12.5761	3.08168	1.16	22.9897	0.93	0.2585	0.201199	1.0552	1.7	32.065	2.58	6.99	7.50781	1.8918	2.06	126.904	2.66	6.35	7.88281	1.2783	1.65	1.73	0.08	27.0999	0.516518	119
29.4053	26.185	2.57437	0.389026	0.796113	1.77341	4.5	3.7618	2.69805	3.25273	4.4173	0.234449	0.941651	1.1761	0.553	19.9626	4.74351	3.34745	9.22861	12.5761	3.08168	1.16	22.9897	0.93	0.2585	0.204043	1.05438	1.7	32.065	2.58	6.99	7.50781	1.8918	2.06	126.904	2.66	6.35	7.88281	1.2783	1.65	1.73	0.08	27.0999	0.513598	109.5
29.4053	26.185	2.57437	0.389026	0.796113	1.77341	5	3.78663	2.69969	3.25389	4.4173	0.225629	0.818659	1.04429	0.553	19.9626	4.74351	3.34745	9.22861	12.5761	3.08168	1.16	22.9897	0.93	0.2585	0.201348	1.06056	1.7	32.065	2.58	6.99	7.50781	1.8918	2.06	126.904	2.66	6.35	7.88281	1.2783	1.65	1.73	0.08	27.0999	0.532878	101
29.4053	26.185	2.57437	0.389026	0.796113	1.77341	4.5	3.87581	2.69697	3.25439	4.4173	0.177943	0.805468	0.983411	0.553	19.9626	4.74351	3.34745	9.22861	12.5761	3.08168	1.16	22.9897	0.93	0.2585	0.20422	1.05438	1.7	32.065	2.58	6.99	7.50781	1.8918	2.06	126.904	2.66	6.35	7.88281	1.2783	1.65	1.73	0.08	27.0999	0.516518	119
29.4053	26.185	2.57437	0.389026	0.796113	1.77341	5	3.85044	2.69891	3.25311	4.4173	0.192624	1.07678	1.2694	0.553	19.9626	4.74351	3.34745	9.22861	12.5761	3.08168	1.16	22.9897	0.93	0.2585	0.201645	1.05999	1.7	32.065	2.58	6.99	7.50781	1.8918	2.06	126.904	2.66	6.35	7.88281	1.2783	1.65	1.73	0.08	27.0999	0.532968	99
29.4053	26.185	2.57437	0.389026	0.796113	1.77341	4.5	3.75757	2.69762	3.25129	4.4173	0.236865	0.937942	1.17481	0.553	19.9626	4.74351	3.34745	9.22861	12.5761	3.08168	1.16	22.9897	0.93	0.2585	0.20404	1.05448	1.7	32.065	2.58	6.99	7.50781	1.8918	2.06	126.904	2.66	6.35	7.88281	1.2783	1.65	1.73	0.08	27.0999	0.513598	109.5
29.4053	26.185	2.57437	0.389026	0.796113	1.77341	5	3.84121	2.69943	3.25717	4.4173	0.19779	1.07406	1.27185	0.553	19.9626	4.74351	3.34745	9.22861	12.5761	3.08168	1.16	22.9897	0.93	0.2585	0.201183	1.06091	1.7	32.065	2.58	6.99	7.50781	1.8918	2.06	126.904	2.66	6.35	7.88281	1.2783	1.65	1.73	0.08	27.0999	0.533158	101
29.4053	26.185	2.57437	0.389026	0.796113	1.77341	4.5	3.76115	2.69671	3.25767	4.4173	0.23474	0.912969	1.14771	0.553	19.9626	4.74351	3.34745	9.22861	12.5761	3.08168	1.16	22.9897	0.93	0.2585	0.204056	1.05474	1.7	32.065	2.58	6.99	7.50781	1.8918	2.06	126.904	2.66	6.35	7.88281	1.2783	1.65	1.73	0.08	27.0999	0.516598	98
29.4053	26.185	2.57437	0.389026	0.796113	1.77341	4.5	3.86282	2.69684	3.25051	4.4173	0.183275	1.02009	1.20336	0.553	19.9626	4.74351	3.34745	9.22861	12.5761	3.08168	1.16	22.9897	0.93	0.2585	0.204337	1.05391	1.7	32.065	2.58	6.99	7.50781	1.8918	2.06	126.904	2.66	6.35	7.88281	1.2783	1.65	1.73	0.08	27.0999	0.513123	102
29.4053	26.185	2.57437	0.389026	0.796113	1.77341	5	3.79422	2.69865	3.25638	4.4173	0.220181	0.814875	1.03506	0.553	19.9626	4.74351	3.34745	9.22861	12.5761	3.08168	1.16	22.9897	0.93	0.2585	0.20148	1.06035	1.7	32.065	2.58	6.99	7.50781	1.8918	2.06	126.904	2.66	6.35	7.88281	1.2783	1.65	1.73	0.08	27.0999	0.533248	99
27.1043	26.076	2.21703	0.338189	0.736776	1.83374	4	3.71632	2.70289	2.97607	4.2187	0.262512	0.857148	1.11966	0.328	21.0077	4.83874	3.05076	8.06791	11.1187	2.62729	1.16	22.9897	0.93	0.2585	0.202518	1.01261	1.7	32.065	2.58	6.99	7.50514	1.7915	1.82	79.904	2.96	4.28	7.88589	1.2434	1.65	2.03	0.38	49.6874	0.379845	125
27.1043	26.076	2.21703	0.338189	0.736776	1.83374	4	3.94914	2.7043	2.97823	4.2187	0.146905	1.10164	1.24855	0.328	21.0077	4.83874	3.05076	8.06791	11.1187	2.62729	1.16	22.9897	0.93	0.2585	0.202686	1.01279	1.7	32.065	2.58	6.99	7.50514	1.7915	1.82	79.904	2.96	4.28	7.88589	1.2434	1.65	2.03	0.38	49.6874	0.351745	60
27.1043	26.076	2.21703	0.338189	0.736776	1.83374	4	3.97846	2.70357	2.98013	4.2187	0.134029	0.873069	1.0071	0.328	21.0077	4.83874	3.05076	8.06791	11.1187	2.62729	1.16	22.9897	0.93	0.2585	0.203696	1.01157	1.7	32.065	2.58	6.99	7.50514	1.7915	1.82	79.904	2.96	4.28	7.88589	1.2434	1.65	2.03	0.38	49.6874	0.380015	112.5
27.1043	26.076	2.21703	0.338189	0.736776	1.83374	4	3.71125	2.70352	2.98031	4.2187	0.266669	1.04621	1.31288	0.328	21.0077	4.83874	3.05076	8.06791	11.1187	2.62729	1.16	22.9897	0.93	0.2585	0.2029	1.01189	1.7	32.065	2.58	6.99	7.50514	1.7915	1.82	79.904	2.96	4.28	7.88589	1.2434	1.65	2.03	0.38	49.6874	0.35201	53
27.1043	26.076	2.21703	0.338189	0.736776	1.83374	4	3.72255	2.68566	2.97373	4.2187	0.236692	0.737368	0.97406	0.328	21.0077	4.83874	3.05076	8.06791	11.1187	2.62729	1.16	22.9897	0.93	0.2585	0.20307	1.01185	1.7	32.065	2.58	6.99	7.50514	1.7915	1.82	79.904	2.96	4.28	7.88589	1.2434	1.65	2.03	0.38	49.6874	0.315715	66
27.1043	26.076	2.21703	0.338189	0.736776	1.83374	4	3.92357	2.70193	2.97502	4.2187	0.162632	0.833901	0.996533	0.328	21.0077	4.83874	3.05076	8.06791	11.1187	2.62729	1.16	22.9897	0.93	0.2585	0.202664	1.01206	1.7	32.065	2.58	6.99	7.50514	1.7915	1.82	79.904	2.96	4.28	7.88589	1.2434	1.65	2.03	0.38	49.6874	0.38006	109
27.1043	26.076	2.21703	0.338189	0.736776	1.83374	4	3.90131	2.68489	2.9758	4.2187	0.146277	1.14013	1.28641	0.328	21.0077	4.83874	3.05076	8.06791	11.1187	2.62729	1.16	22.9897	0.93	0.2585	0.203284	1.01095	1.7	32.065	2.58	6.99	7.50514	1.7915	1.82	79.904	2.96	4.28	7.88589	1.2434	1.65	2.03	0.38	49.6874	0.31249	57
27.1043	26.076	2.21703	0.338189	0.736776	1.83374	4	3.71468	2.70335	2.97719	4.2187	0.268581	1.0133	1.28188	0.328	21.0077	4.83874	3.05076	8.06791	11.1187	2.62729	1.16	22.9897	0.93	0.2585	0.202832	1.01225	1.7	32.065	2.58	6.99	7.50514	1.7915	1.82	79.904	2.96	4.28	7.88589	1.2434	1.65	2.03	0.38	49.6874	0.3519	58
27.1043	26.076	2.21703	0.338189	0.736776	1.83374	4	3.84119	2.68635	2.97778	4.2187	0.181914	1.11155	1.29346	0.328	21.0077	4.83874	3.05076	8.06791	11.1187	2.62729	1.16	22.9897	0.93	0.2585	0.203467	1.01082	1.7	32.065	2.58	6.99	7.50514	1.7915	1.82	79.904	2.96	4.28	7.88589	1.2434	1.65	2.03	0.38	49.6874	0.31554	65
27.1043	26.076	2.21703	0.338189	0.736776	1.83374	4	3.67464	2.70262	2.97908	4.2187	0.287516	0.79758	1.0851	0.328	21.0077	4.83874	3.05076	8.06791	11.1187	2.62729	1.16	22.9897	0.93	0.2585	0.203061	1.01103	1.7	32.065	2.58	6.99	7.50514	1.7915	1.82	79.904	2.96	4.28	7.88589	1.2434	1.65	2.03	0.38	49.6874	0.38023	136
27.1043	26.076	2.21703	0.338189	0.736776	1.83374	4	3.91879	2.70257	2.97926	4.2187	0.164315	1.1124	1.27672	0.328	21.0077	4.83874	3.05076	8.06791	11.1187	2.62729	1.16	22.9897	0.93	0.2585	0.203045	1.01134	1.7	32.065	2.58	6.99	7.50514	1.7915	1.82	79.904	2.96	4.28	7.88589	1.2434	1.65	2.03	0.38	49.6874	0.352165	50.5
27.1043	26.076	2.21703	0.338189	0.736776	1.83374	4	3.73357	2.68558	2.97986	4.2187	0.233349	0.699552	0.932901	0.328	21.0077	4.83874	3.05076	8.06791	11.1187	2.62729	1.16	22.9897	0.93	0.2585	0.20368	1.00991	1.7	32.065	2.58	6.99	7.50514	1.7915	1.82	79.904	2.96	4.28	7.88589	1.2434	1.65	2.03	0.38	49.6874	0.312315	65
25.2432	25.769	1.79567	0.31762	0.69969	1.81896	4	4.34378	2.70051	2.79727	3.9391	-0.0751336	1.02199	0.946857	1.242	21.5831	4.982	2.90385	4.62595	7.5298	2.33965	1.16	22.9897	0.93	0.2585	0.200301	1.00053	1.7	32.065	2.58	6.99	7.51262	1.7625	1.67	35.453	3.16	3.14	7.88069	1.2238	1.65	2.23	0.58	63.5726	0.563927	99
25.2432	25.769	1.79567	0.31762	0.69969	1.81896	4	4.28414	2.69514	2.7912	3.9391	-0.0298928	0.958666	0.928773	1.242	21.5831	4.982	2.90385	4.62595	7.5298	2.33965	1.16	22.9897	0.93	0.2585	0.20583	0.993147	1.7	32.065	2.58	6.99	7.51262	1.7625	1.67	35.453	3.16	3.14	7.88069	1.2238	1.65	2.23	0.58	63.5726	0.614142	148.5
25.2432	25.769	1.79567	0.31762	0.69969	1.81896	4	3.65429	2.69486	2.79125	3.9391	0.280871	1.03194	1.31282	1.242	21.5831	4.982	2.90385	4.62595	7.5298	2.33965	1.16	22.9897	0.93	0.2585	0.20301	0.993128	1.7	32.065	2.58	6.99	7.51262	1.7625	1.67	35.453	3.16	3.14	7.88069	1.2238	1.65	2.23	0.58	63.5726	0.521332	40.5
25.2432	25.769	1.79567	0.31762	0.69969	1.81896	4	3.82056	2.70098	2.79488	3.9391	0.226201	1.04227	1.26847	1.242	21.5831	4.982	2.90385	4.62595	7.5298	2.33965	1.16	22.9897	0.93	0.2585	0.200607	1.00022	1.7	32.065	2.58	6.99	7.51262	1.7625	1.67	35.453	3.16	3.14	7.88069	1.2238	1.65	2.23	0.58	63.5726	0.517852	36
25.2432	25.769	1.79567	0.31762	0.69969	1.81896	4	3.65555	2.70077	2.79746	3.9391	0.326924	0.569725	0.896649	1.242	21.5831	4.982	2.90385	4.62595	7.5298	2.33965	1.16	22.9897	0.93	0.2585	0.20044	1.00038	1.7	32.065	2.58	6.99	7.51262	1.7625	1.67	35.453	3.16	3.14	7.88069	1.2238	1.65	2.23	0.58	63.5726	0.657192	155
25.2432	25.769	1.79567	0.31762	0.69969	1.81896	4	4.22828	2.69533	2.78886	3.9391	-0.0280806	1.06763	1.03955	1.242	21.5831	4.982	2.90385	4.62595	7.5298	2.33965	1.16	22.9897	0.93	0.2585	0.203316	0.992823	1.7	32.065	2.58	6.99	7.51262	1.7625	1.67	35.453	3.16	3.14	7.88069	1.2238	1.65	2.23	0.58	63.5726	0.593707	120
25.2432	25.769	1.79567	0.31762	0.69969	1.81896	4	3.59174	2.70057	2.79769	3.9391	0.371	0.676117	1.04712	1.242	21.5831	4.982	2.90385	4.62595	7.5298	2.33965	1.16	22.9897	0.93	0.2585	0.200337	1.00043	1.7	32.065	2.58	6.99	7.51262	1.7625	1.67	35.453	3.16	3.14	7.88069	1.2238	1.65	2.23	0.58	63.5726	0.563177	127.5
25.2432	25.769	1.79567	0.31762	0.69969	1.81896	4	3.5243	2.69542	2.78904	3.9391	0.383126	0.709183	1.09231	1.242	21.5831	4.982	2.90385	4.62595	7.5298	2.33965	1.16	22.9897	0.93	0.2585	0.203166	0.992887	1.7	32.065	2.58	6.99	7.51262	1.7625	1.67	35.453	3.16	3.14	7.88069	1.2238	1.65	2.23	0.58	63.5726	0.584682	96
25.2432	25.769	1.79567	0.31762	0.69969	1.81896	4	3.5222	2.69521	2.79163	3.9391	0.405665	0.669755	1.07542	1.242	21.5831	4.982	2.90385	4.62595	7.5298	2.33965	1.16	22.9897	0.93	0.2585	0.203	0.993048	1.7	32.065	2.58	6.99	7.51262	1.7625	1.67	35.453	3.16	3.14	7.88069	1.2238	1.65	2.23	0.58	63.5726	0.614667	113
25.2432	25.769	1.79567	0.31762	0.69969	1.81896	4	3.76071	2.69492	2.79168	3.9391	0.270195	1.00027	1.27046	1.242	21.5831	4.982	2.90385	4.62595	7.5298	2.33965	1.16	22.9897	0.93	0.2585	0.203045	0.99303	1.7	32.065	2.58	6.99	7.51262	1.7625	1.67	35.453	3.16	3.14	7.88069	1.2238	1.65	2.23	0.58	63.5726	0.520582	34.5
25.2432	25.769	1.79567	0.31762	0.69969	1.81896	4	3.623	2.68977	2.78303	3.9391	0.316626	0.540222	0.856848	1.242	21.5831	4.982	2.90385	4.62595	7.5298	2.33965	1.16	22.9897	0.93	0.2585	0.205875	0.985488	1.7	32.065	2.58	6.99	7.51262	1.7625	1.67	35.453	3.16	3.14	7.88069	1.2238	1.65	2.23	0.58	63.5726	0.660537	148
17.6452	15.758	2.25918	0.313267	0.860564	1.38228	4.5	3.21265	2.27642	2.77327	3.6437	0.423174	0.752009	1.17518	1.282	31.7713	5.15744	3.18064	11.3562	14.5368	1.77313	1.16	22.9897	0.93	0.2585	0.205921	1.06474	1.19	18.9984	3.98	1.02	7.83664	1.2784	1.7	32.065	2.58	6.99	7.54743	1.9128	1.65	3.05	1.4	44.8568	1.71982	122
17.6452	15.758	2.25918	0.313267	0.860564	1.38228	4.5	3.2332	2.27643	2.77327	3.6437	0.412865	0.720787	1.13365	1.282	31.7713	5.15744	3.18064	11.3562	14.5368	1.77313	1.16	22.9897	0.93	0.2585	0.205908	1.06474	1.19	18.9984	3.98	1.02	7.83664	1.2784	1.7	32.065	2.58	6.99	7.54743	1.9128	1.65	3.05	1.4	44.8568	1.72195	128
17.6452	15.758	2.25918	0.313267	0.860564	1.38228	4.5	3.22616	2.27587	2.77364	3.6437	0.41566	0.918003	1.33366	1.282	31.7713	5.15744	3.18064	11.3562	14.5368	1.77313	1.16	22.9897	0.93	0.2585	0.205918	1.06467	1.19	18.9984	3.98	1.02	7.83664	1.2784	1.7	32.065	2.58	6.99	7.54743	1.9128	1.65	3.05	1.4	44.8568	1.71984	130.5
17.6452	15.758	2.25918	0.313267	0.860564	1.38228	4.5	3.20707	2.27586	2.77363	3.6437	0.426637	0.774963	1.2016	1.282	31.7713	5.15744	3.18064	11.3562	14.5368	1.77313	1.16	22.9897	0.93	0.2585	0.205913	1.06466	1.19	18.9984	3.98	1.02	7.83664	1.2784	1.7	32.065	2.58	6.99	7.54743	1.9128	1.65	3.05	1.4	44.8568	1.72214	74
17.6452	15.758	2.25918	0.313267	0.860564	1.38228	5	3.1844	2.28144	2.76226	3.6437	0.444032	0.742462	1.18649	1.282	31.7713	5.15744	3.18064	11.3562	14.5368	1.77313	1.16	22.9897	0.93	0.2585	0.204121	1.06235	1.19	18.9984	3.98	1.02	7.83664	1.2784	1.7	32.065	2.58	6.99	7.54743	1.9128	1.65	3.05	1.4	44.8568	1.84614	114
17.6452	15.758	2.25918	0.313267	0.860564	1.38228	4.5	3.22628	2.27647	2.77326	3.6437	0.416356	0.917423	1.33378	1.282	31.7713	5.15744	3.18064	11.3562	14.5368	1.77313	1.16	22.9897	0.93	0.2585	0.205921	1.06473	1.19	18.9984	3.98	1.02	7.83664	1.2784	1.7	32.065	2.58	6.99	7.54743	1.9128	1.65	3.05	1.4	44.8568	1.71978	130.5
17.6452	15.758	2.25918	0.313267	0.860564	1.38228	5	3.26813	2.28088	2.76262	3.6437	0.402878	0.900097	1.30297	1.282	31.7713	5.15744	3.18064	11.3562	14.5368	1.77313	1.16	22.9897	0.93	0.2585	0.204125	1.06227	1.19	18.9984	3.98	1.02	7.83664	1.2784	1.7	32.065	2.58	6.99	7.54743	1.9128	1.65	3.05	1.4	44.8568	1.84601	78
17.6452	15.758	2.25918	0.313267	0.860564	1.38228	4.5	3.20606	2.27648	2.77326	3.6437	0.426362	0.77526	1.20162	1.282	31.7713	5.15744	3.18064	11.3562	14.5368	1.77313	1.16	22.9897	0.93	0.2585	0.205908	1.06473	1.19	18.9984	3.98	1.02	7.83664	1.2784	1.7	32.065	2.58	6.99	7.54743	1.9128	1.65	3.05	1.4	44.8568	1.72214	74
17.6452	15.758	2.25918	0.313267	0.860564	1.38228	5	3.26771	2.2809	2.76264	3.6437	0.401532	0.900147	1.30168	1.282	31.7713	5.15744	3.18064	11.3562	14.5368	1.77313	1.16	22.9897	0.93	0.2585	0.204117	1.06228	1.19	18.9984	3.98	1.02	7.83664	1.2784	1.7	32.065	2.58	6.99	7.54743	1.9128	1.65	3.05	1.4	44.8568	1.84599	79
17.6452	15.758	2.25918	0.313267	0.860564	1.38228	4.5	3.21131	2.27592	2.77364	3.6437	0.422938	0.752389	1.17533	1.282	31.7713	5.15744	3.18064	11.3562	14.5368	1.77313	1.16	22.9897	0.93	0.2585	0.205918	1.06466	1.19	18.9984	3.98	1.02	7.83664	1.2784	1.7	32.065	2.58	6.99	7.54743	1.9128	1.65	3.05	1.4	44.8568	1.71979	122
17.6452	15.758	2.25918	0.313267	0.860564	1.38228	4.5	3.23286	2.27591	2.77362	3.6437	0.413666	0.720773	1.13444	1.282	31.7713	5.15744	3.18064	11.3562	14.5368	1.77313	1.16	22.9897	0.93	0.2585	0.205913	1.06465	1.19	18.9984	3.98	1.02	7.83664	1.2784	1.7	32.065	2.58	6.99	7.54743	1.9128	1.65	3.05	1.4	44.8568	1.72195	128
17.6452	15.758	2.25918	0.313267	0.860564	1.38228	5	3.18441	2.28033	2.763	3.6437	0.443901	0.742943	1.18684	1.282	31.7713	5.15744	3.18064	11.3562	14.5368	1.77313	1.16	22.9897	0.93	0.2585	0.204122	1.0622	1.19	18.9984	3.98	1.02	7.83664	1.2784	1.7	32.065	2.58	6.99	7.54743	1.9128	1.65	3.05	1.4	44.8568	1.84585	114
21.3757	17.813	3.29181	0.421009	0.940861	1.35845	6	3.3557	2.3728	3.3557	4.1099	0.417845	0.846112	1.26396	2.704	28.9	4.41402	3.5821	4.84492	8.42702	2.36052	1.16	22.9897	0.93	0.2485	0.217406	1.06409	1.26	15.9994	3.44	2.95	7.47831	2.01334	2.06	126.904	2.66	6.35	7.86947	1.17847	2.51	1.73	0.78	-18.743	2.0576	165
19.6952	16.413	2.78015	0.341521	0.870735	1.40511	6	3.2653	2.3089	3.2653	3.9992	0.37267	1.00787	1.38054	1.199	31.2	4.63549	3.13637	7.44286	10.5792	1.95565	1.16	22.9897	0.93	0.2485	0.217728	1.02898	1.26	15.9994	3.44	2.95	7.45327	1.84745	1.82	79.904	2.96	4.28	7.89355	1.23909	2.51	2.03	0.48	-23.8895	1.25469	125
18.8212	15.6843	2.12489	0.296351	0.826906	1.46551	6	3.2163	2.2743	3.2163	3.93915	0.348152	1.1154	1.46355	0.908	32.408	5.07475	2.86156	20.6278	23.4893	1.72052	1.16	22.9897	0.93	0.2485	0.21561	1.00417	1.26	15.9994	3.44	2.95	7.44238	1.73702	1.67	35.453	3.16	3.14	7.91079	1.2755	2.51	2.23	0.28	0.213706	0.937765	101
14.6345	15.354	2.35937	0.21098	0.686653	1.52821	4	3.72713	2.30236	2.29909	3.2328	0.066203	1.03769	1.1039	2.134	36.7595	4.91828	2.69761	5.5531	8.25071	1.26255	1.16	22.9897	0.93	0.2485	0.217433	0.941942	1.26	15.9994	3.44	2.95	7.49056	1.6724	1.19	18.9984	3.98	1.02	7.85355	1.1525	2.51	3.05	0.54	55.5807	1.13214	114.5
14.6345	15.354	2.35937	0.21098	0.686653	1.52821	4	3.64381	2.29823	2.29582	3.2328	0.12325	0.98345	1.1067	2.134	36.7595	4.91828	2.69761	5.5531	8.25071	1.26255	1.16	22.9897	0.93	0.2485	0.221061	0.945535	1.26	15.9994	3.44	2.95	7.49056	1.6724	1.19	18.9984	3.98	1.02	7.85355	1.1525	2.51	3.05	0.54	55.5807	1.1791	178.5
14.6345	15.354	2.35937	0.21098	0.686653	1.52821	4	3.01363	2.32124	2.29581	3.2328	0.430295	1.0432	1.47349	2.134	36.7595	4.91828	2.69761	5.5531	8.25071	1.26255	1.16	22.9897	0.93	0.2485	0.218289	0.945523	1.26	15.9994	3.44	2.95	7.49056	1.6724	1.19	18.9984	3.98	1.02	7.85355	1.1525	2.51	3.05	0.54	55.5807	1.03228	100.5
14.6345	15.354	2.35937	0.21098	0.686653	1.52821	4	3.2378	2.28989	2.304	3.2328	0.359404	1.06081	1.42021	2.134	36.7595	4.91828	2.69761	5.5531	8.25071	1.26255	1.16	22.9897	0.93	0.2485	0.219325	0.934528	1.26	15.9994	3.44	2.95	7.49056	1.6724	1.19	18.9984	3.98	1.02	7.85355	1.1525	2.51	3.05	0.54	55.5807	1.08768	50
14.6345	15.354	2.35937	0.21098	0.686653	1.52821	4	3.54931	2.30877	2.30073	3.2328	0.150652	1.07663	1.22728	2.134	36.7595	4.91828	2.69761	5.5531	8.25071	1.26255	1.16	22.9897	0.93	0.2485	0.220181	0.93811	1.26	15.9994	3.44	2.95	7.49056	1.6724	1.19	18.9984	3.98	1.02	7.85355	1.1525	2.51	3.05	0.54	55.5807	1.06469	380
14.6345	15.354	2.35937	0.21098	0.686653	1.52821	4	2.95855	2.26719	2.30077	3.2328	0.512653	0.703451	1.2161	2.134	36.7595	4.91828	2.69761	5.5531	8.25071	1.26255	1.16	22.9897	0.93	0.2485	0.220208	0.938123	1.26	15.9994	3.44	2.95	7.49056	1.6724	1.19	18.9984	3.98	1.02	7.85355	1.1525	2.51	3.05	0.54	55.5807	1.06444	382
14.6345	15.354	2.35937	0.21098	0.686653	1.52821	4	2.97769	2.26432	2.29586	3.2328	0.520423	0.71067	1.23109	2.134	36.7595	4.91828	2.69761	5.5531	8.25071	1.26255	1.16	22.9897	0.93	0.2485	0.218295	0.94553	1.26	15.9994	3.44	2.95	7.49056	1.6724	1.19	18.9984	3.98	1.02	7.85355	1.1525	2.51	3.05	0.54	55.5807	1.17905	158.5
14.6345	15.354	2.35937	0.21098	0.686653	1.52821	4	3.15546	2.28733	2.29585	3.2328	0.410117	0.997941	1.40806	2.134	36.7595	4.91828	2.69761	5.5531	8.25071	1.26255	1.16	22.9897	0.93	0.2485	0.218298	0.945518	1.26	15.9994	3.44	2.95	7.49056	1.6724	1.19	18.9984	3.98	1.02	7.85355	1.1525	2.51	3.05	0.54	55.5807	1.03218	35.5
14.6345	15.354	2.35937	0.21098	0.686653	1.52821	4	3.06394	2.28607	2.2975	3.2328	0.436397	0.57797	1.01437	2.134	36.7595	4.91828	2.69761	5.5531	8.25071	1.26255	1.16	22.9897	0.93	0.2485	0.221064	0.941705	1.26	15.9994	3.44	2.95	7.49056	1.6724	1.19	18.9984	3.98	1.02	7.85355	1.1525	2.51	3.05	0.54	55.5807	1.04145	50
23.3314	21.398	3.22675	0.537573	0.763882	1.35993	4	3.41308	2.53078	2.92774	4.1442	0.0326166	0.584617	0.617234	0.79	23.9795	5.42365	4.10765	12.5455	16.6532	2.83407	0.9	6.941	0.98	0.075	0.138269	1.10226	1.84	78.96	2.55	6.98	7.67104	1.9344	2.06	126.904	2.66	6.19	7.91291	1.3612	1.57	1.68	0.11	51.5821	1.13876	72.5
23.3314	21.398	3.22675	0.537573	0.763882	1.35993	4	3.57732	2.5302	2.92993	4.1442	-0.0498334	0.734408	0.684574	0.79	23.9795	5.42365	4.10765	12.5455	16.6532	2.83407	0.9	6.941	0.98	0.075	0.138268	1.10303	1.84	78.96	2.55	6.98	7.67104	1.9344	2.06	126.904	2.66	6.19	7.91291	1.3612	1.57	1.68	0.11	51.5821	1.12008	92.5
23.3314	21.398	3.22675	0.537573	0.763882	1.35993	4	3.73675	2.53061	2.93156	4.1442	-0.130437	0.657939	0.527502	0.79	23.9795	5.42365	4.10765	12.5455	16.6532	2.83407	0.9	6.941	0.98	0.075	0.139634	1.10366	1.84	78.96	2.55	6.98	7.67104	1.9344	2.06	126.904	2.66	6.19	7.91291	1.3612	1.57	1.68	0.11	51.5821	1.13857	106
23.3314	21.398	3.22675	0.537573	0.763882	1.35993	4	3.5767	2.5303	2.931	4.1442	-0.0494174	0.748882	0.699465	0.79	23.9795	5.42365	4.10765	12.5455	16.6532	2.83407	0.9	6.941	0.98	0.075	0.138266	1.10242	1.84	78.96	2.55	6.98	7.67104	1.9344	2.06	126.904	2.66	6.19	7.91291	1.3612	1.57	1.68	0.11	51.5821	1.12005	122
23.3314	21.398	3.22675	0.537573	0.763882	1.35993	4	3.45464	2.51567	2.96792	4.1442	-0.00780535	0.386024	0.378219	0.79	23.9795	5.42365	4.10765	12.5455	16.6532	2.83407	0.9	6.941	0.98	0.075	0.140004	1.08904	1.84	78.96	2.55	6.98	7.67104	1.9344	2.06	126.904	2.66	6.19	7.91291	1.3612	1.57	1.68	0.11	51.5821	1.07742	87
23.3314	21.398	3.22675	0.537573	0.763882	1.35993	4	3.73917	2.53005	2.92682	4.1442	-0.129473	0.659241	0.529768	0.79	23.9795	5.42365	4.10765	12.5455	16.6532	2.83407	0.9	6.941	0.98	0.075	0.138084	1.10277	1.84	78.96	2.55	6.98	7.67104	1.9344	2.06	126.904	2.66	6.19	7.91291	1.3612	1.57	1.68	0.11	51.5821	1.13857	106
23.3314	21.398	3.22675	0.537573	0.763882	1.35993	4	3.66815	2.51578	2.96899	4.1442	-0.114536	0.77781	0.663274	0.79	23.9795	5.42365	4.10765	12.5455	16.6532	2.83407	0.9	6.941	0.98	0.075	0.140002	1.08843	1.84	78.96	2.55	6.98	7.67104	1.9344	2.06	126.904	2.66	6.19	7.91291	1.3612	1.57	1.68	0.11	51.5821	1.07654	69
23.3314	21.398	3.22675	0.537573	0.763882	1.35993	4	3.58963	2.52946	2.92901	4.1442	-0.0554594	0.746642	0.691183	0.79	23.9795	5.42365	4.10765	12.5455	16.6532	2.83407	0.9	6.941	0.98	0.075	0.138083	1.10353	1.84	78.96	2.55	6.98	7.67104	1.9344	2.06	126.904	2.66	6.19	7.91291	1.3612	1.57	1.68	0.11	51.5821	1.12005	122
23.3314	21.398	3.22675	0.537573	0.763882	1.35993	4	3.65956	2.5155	2.97174	4.1442	-0.111768	0.788427	0.676659	0.79	23.9795	5.42365	4.10765	12.5455	16.6532	2.83407	0.9	6.941	0.98	0.075	0.139819	1.09044	1.84	78.96	2.55	6.98	7.67104	1.9344	2.06	126.904	2.66	6.19	7.91291	1.3612	1.57	1.68	0.11	51.5821	1.07712	70
23.3314	21.398	3.22675	0.537573	0.763882	1.35993	4	3.42745	2.52987	2.93064	4.1442	0.025062	0.59973	0.624792	0.79	23.9795	5.42365	4.10765	12.5455	16.6532	2.83407	0.9	6.941	0.98	0.075	0.137899	1.10417	1.84	78.96	2.55	6.98	7.67104	1.9344	2.06	126.904	2.66	6.19	7.91291	1.3612	1.57	1.68	0.11	51.5821	1.13876	72.5
23.3314	21.398	3.22675	0.537573	0.763882	1.35993	4	3.57356	2.52956	2.93007	4.1442	-0.0472268	0.727277	0.68005	0.79	23.9795	5.42365	4.10765	12.5455	16.6532	2.83407	0.9	6.941	0.98	0.075	0.13808	1.10292	1.84	78.96	2.55	6.98	7.67104	1.9344	2.06	126.904	2.66	6.19	7.91291	1.3612	1.57	1.68	0.11	51.5821	1.12008	92.5
23.3314	21.398	3.22675	0.537573	0.763882	1.35993	4	3.45277	2.5156	2.97281	4.1442	-0.00833196	0.391165	0.382833	0.79	23.9795	5.42365	4.10765	12.5455	16.6532	2.83407	0.9	6.941	0.98	0.075	0.139816	1.08983	1.84	78.96	2.55	6.98	7.67104	1.9344	2.06	126.904	2.66	6.19	7.91291	1.3612	1.57	1.68	0.11	51.5821	1.07623	87
21.0145	20.785	2.83972	0.488676	0.701945	1.26412	4	3.69518	2.51398	2.64953	3.8498	-0.135381	0.782934	0.647553	1.118	24.6819	5.75042	3.69316	6.97275	10.6659	2.37323	0.9	6.941	0.98	0.075	0.140134	1.05432	1.84	78.96	2.55	6.98	7.64633	1.8178	1.82	79.904	2.96	4.13	7.93097	1.3242	1.57	1.98	0.41	64.33	1.01762	106.5
21.0145	20.785	2.83972	0.488676	0.701945	1.26412	4	3.96093	2.5139	2.64572	3.8498	-0.273385	0.690731	0.417346	1.118	24.6819	5.75042	3.69316	6.97275	10.6659	2.37323	0.9	6.941	0.98	0.075	0.13993	1.05529	1.84	78.96	2.55	6.98	7.64633	1.8178	1.82	79.904	2.96	4.13	7.93097	1.3242	1.57	1.98	0.41	64.33	0.99466	53
21.0145	20.785	2.83972	0.488676	0.701945	1.26412	4	3.95032	2.51153	2.64629	3.8498	-0.26284	0.65898	0.39614	1.118	24.6819	5.75042	3.69316	6.97275	10.6659	2.37323	0.9	6.941	0.98	0.075	0.142444	1.04357	1.84	78.96	2.55	6.98	7.64633	1.8178	1.82	79.904	2.96	4.13	7.93097	1.3242	1.57	1.98	0.41	64.33	1.00388	107.5
21.0145	20.785	2.83972	0.488676	0.701945	1.26412	4	3.49307	2.51034	2.64538	3.8498	-0.0367791	0.825778	0.788999	1.118	24.6819	5.75042	3.69316	6.97275	10.6659	2.37323	0.9	6.941	0.98	0.075	0.140867	1.04435	1.84	78.96	2.55	6.98	7.64633	1.8178	1.82	79.904	2.96	4.13	7.93097	1.3242	1.57	1.98	0.41	64.33	0.97536	48
21.0145	20.785	2.83972	0.488676	0.701945	1.26412	4	3.52847	2.51248	2.64536	3.8498	-0.0352456	0.74137	0.706125	1.118	24.6819	5.75042	3.69316	6.97275	10.6659	2.37323	0.9	6.941	0.98	0.075	0.140336	1.05531	1.84	78.96	2.55	6.98	7.64633	1.8178	1.82	79.904	2.96	4.13	7.93097	1.3242	1.57	1.98	0.41	64.33	0.93799	45
21.0145	20.785	2.83972	0.488676	0.701945	1.26412	4	3.39341	2.51454	2.65122	3.8498	0.0433278	0.356993	0.40032	1.118	24.6819	5.75042	3.69316	6.97275	10.6659	2.37323	0.9	6.941	0.98	0.075	0.140428	1.0533	1.84	78.96	2.55	6.98	7.64633	1.8178	1.82	79.904	2.96	4.13	7.93097	1.3242	1.57	1.98	0.41	64.33	1.01766	107.5
21.0145	20.785	2.83972	0.488676	0.701945	1.26412	4	3.96581	2.50892	2.64502	3.8498	-0.302701	0.756693	0.453992	1.118	24.6819	5.75042	3.69316	6.97275	10.6659	2.37323	0.9	6.941	0.98	0.075	0.141272	1.04438	1.84	78.96	2.55	6.98	7.64633	1.8178	1.82	79.904	2.96	4.13	7.93097	1.3242	1.57	1.98	0.41	64.33	0.992385	106
21.0145	20.785	2.83972	0.488676	0.701945	1.26412	4	3.31566	2.51445	2.64741	3.8498	0.0925121	0.522154	0.614666	1.118	24.6819	5.75042	3.69316	6.97275	10.6659	2.37323	0.9	6.941	0.98	0.075	0.140224	1.05427	1.84	78.96	2.55	6.98	7.64633	1.8178	1.82	79.904	2.96	4.13	7.93097	1.3242	1.57	1.98	0.41	64.33	0.994205	123
21.0145	20.785	2.83972	0.488676	0.701945	1.26412	4	3.26015	2.51003	2.64212	3.8498	0.104603	0.552378	0.656981	1.118	24.6819	5.75042	3.69316	6.97275	10.6659	2.37323	0.9	6.941	0.98	0.075	0.141288	1.04456	1.84	78.96	2.55	6.98	7.64633	1.8178	1.82	79.904	2.96	4.13	7.93097	1.3242	1.57	1.98	0.41	64.33	0.992325	55
21.0145	20.785	2.83972	0.488676	0.701945	1.26412	4	3.24995	2.51208	2.64798	3.8498	0.12299	0.502609	0.625599	1.118	24.6819	5.75042	3.69316	6.97275	10.6659	2.37323	0.9	6.941	0.98	0.075	0.14138	1.04255	1.84	78.96	2.55	6.98	7.64633	1.8178	1.82	79.904	2.96	4.13	7.93097	1.3242	1.57	1.98	0.41	64.33	1.00392	152
21.0145	20.785	2.83972	0.488676	0.701945	1.26412	4	3.50896	2.51089	2.64707	3.8498	-0.0157086	0.786928	0.77122	1.118	24.6819	5.75042	3.69316	6.97275	10.6659	2.37323	0.9	6.941	0.98	0.075	0.14116	1.04333	1.84	78.96	2.55	6.98	7.64633	1.8178	1.82	79.904	2.96	4.13	7.93097	1.3242	1.57	1.98	0.41	64.33	0.974905	31.5
21.0145	20.785	2.83972	0.488676	0.701945	1.26412	4	3.37545	2.50647	2.64178	3.8498	0.0345475	0.347931	0.382478	1.118	24.6819	5.75042	3.69316	6.97275	10.6659	2.37323	0.9	6.941	0.98	0.075	0.142225	1.03363	1.84	78.96	2.55	6.98	7.64633	1.8178	1.82	79.904	2.96	4.13	7.93097	1.3242	1.57	1.98	0.41	64.33	1.04672	138
19.168	20.303	2.34312	0.475826	0.663235	1.20282	4	4.1379	2.51458	2.4737	3.6943	-0.383948	0.675948	0.292	1.367	25.407	5.92932	3.56391	6.2755	9.83941	2.10868	0.9	6.941	0.98	0.075	0.139093	1.05101	1.84	78.96	2.55	6.98	7.63381	1.7906	1.67	35.453	3.16	2.94	7.94564	1.3416	1.57	2.18	0.61	73.1032	1.30809	83
19.168	20.303	2.34312	0.475826	0.663235	1.20282	4	4.09229	2.50968	2.47888	3.6943	-0.342035	0.673883	0.331848	1.367	25.407	5.92932	3.56391	6.2755	9.83941	2.10868	0.9	6.941	0.98	0.075	0.142197	1.04299	1.84	78.96	2.55	6.98	7.63381	1.7906	1.67	35.453	3.16	2.94	7.94564	1.3416	1.57	2.18	0.61	73.1032	1.30943	116
19.168	20.303	2.34312	0.475826	0.663235	1.20282	4	3.45491	2.50986	2.47889	3.6943	-0.0192212	0.696628	0.677406	1.367	25.407	5.92932	3.56391	6.2755	9.83941	2.10868	0.9	6.941	0.98	0.075	0.140335	1.04285	1.84	78.96	2.55	6.98	7.63381	1.7906	1.67	35.453	3.16	2.94	7.94564	1.3416	1.57	2.18	0.61	73.1032	1.2449	84.5
19.168	20.303	2.34312	0.475826	0.663235	1.20282	4	3.55334	2.51393	2.4679	3.6943	-0.0397519	0.669068	0.629316	1.367	25.407	5.92932	3.56391	6.2755	9.83941	2.10868	0.9	6.941	0.98	0.075	0.139923	1.04662	1.84	78.96	2.55	6.98	7.63381	1.7906	1.67	35.453	3.16	2.94	7.94564	1.3416	1.57	2.18	0.61	73.1032	1.24585	48
19.168	20.303	2.34312	0.475826	0.663235	1.20282	4	4.06935	2.50921	2.47309	3.6943	-0.37167	0.748263	0.376593	1.367	25.407	5.92932	3.56391	6.2755	9.83941	2.10868	0.9	6.941	0.98	0.075	0.141165	1.03846	1.84	78.96	2.55	6.98	7.63381	1.7906	1.67	35.453	3.16	2.94	7.94564	1.3416	1.57	2.18	0.61	73.1032	1.36056	153
19.168	20.303	2.34312	0.475826	0.663235	1.20282	4	3.21389	2.5145	2.47353	3.6943	0.154474	0.439274	0.593747	1.367	25.407	5.92932	3.56391	6.2755	9.83941	2.10868	0.9	6.941	0.98	0.075	0.139076	1.05105	1.84	78.96	2.55	6.98	7.63381	1.7906	1.67	35.453	3.16	2.94	7.94564	1.3416	1.57	2.18	0.61	73.1032	1.30866	146.5
19.168	20.303	2.34312	0.475826	0.663235	1.20282	4	3.1505	2.50959	2.4787	3.6943	0.187192	0.439511	0.626703	1.367	25.407	5.92932	3.56391	6.2755	9.83941	2.10868	0.9	6.941	0.98	0.075	0.140214	1.04303	1.84	78.96	2.55	6.98	7.63381	1.7906	1.67	35.453	3.16	2.94	7.94564	1.3416	1.57	2.18	0.61	73.1032	1.30895	241
19.168	20.303	2.34312	0.475826	0.663235	1.20282	4	3.48984	2.50978	2.47872	3.6943	0.00702616	0.659584	0.66661	1.367	25.407	5.92932	3.56391	6.2755	9.83941	2.10868	0.9	6.941	0.98	0.075	0.140319	1.04289	1.84	78.96	2.55	6.98	7.63381	1.7906	1.67	35.453	3.16	2.94	7.94564	1.3416	1.57	2.18	0.61	73.1032	1.24547	24
12.9059	10.755	3.0566	0.513762	0.92702	0.73482	6	2.8362	2.0055	2.8362	3.4736	0.228105	0.6162	0.844305	0.326	47.4743	6.07766	4.11257	18.7938	22.9064	1.5689	0.9	6.941	0.98	0.075	0.140923	1.19747	1.19	18.9984	3.98	0.89	7.9298	1.59022	1.84	78.96	2.55	6.98	7.64744	2.00446	1.57	3	1.43	57.4884	5.32125	68
21.1456	18.52	2.82378	0.540983	0.805014	1.20941	4.5	3.33718	2.408	2.96846	4.0497	0.0361673	0.643578	0.679745	0.763	27.6757	5.6684	4.06227	13.6228	17.6851	2.55	0.9	6.941	0.98	0.075	0.136201	1.14287	1.7	32.065	2.58	5.63	7.68605	2.0575	2.06	126.904	2.66	6.19	7.9046	1.3654	1.6	1.68	0.08	44.1371	1.33866	109
21.1456	18.52	2.82378	0.540983	0.805014	1.20941	4.5	3.37754	2.40621	2.96688	4.0497	0.0140094	0.678993	0.693003	0.763	27.6757	5.6684	4.06227	13.6228	17.6851	2.55	0.9	6.941	0.98	0.075	0.13628	1.14298	1.7	32.065	2.58	5.63	7.68605	2.0575	2.06	126.904	2.66	6.19	7.9046	1.3654	1.6	1.68	0.08	44.1371	1.33972	109.5
21.1456	18.52	2.82378	0.540983	0.805014	1.20941	4.5	3.48152	2.40665	2.96643	4.0497	-0.0373184	0.660131	0.622813	0.763	27.6757	5.6684	4.06227	13.6228	17.6851	2.55	0.9	6.941	0.98	0.075	0.136866	1.14206	1.7	32.065	2.58	5.63	7.68605	2.0575	2.06	126.904	2.66	6.19	7.9046	1.3654	1.6	1.68	0.08	44.1371	1.33853	129
21.1456	18.52	2.82378	0.540983	0.805014	1.20941	4.5	3.43259	2.40727	2.96333	4.0497	-0.0118561	0.690769	0.678913	0.763	27.6757	5.6684	4.06227	13.6228	17.6851	2.55	0.9	6.941	0.98	0.075	0.13666	1.14115	1.7	32.065	2.58	5.63	7.68605	2.0575	2.06	126.904	2.66	6.19	7.9046	1.3654	1.6	1.68	0.08	44.1371	1.34012	129
21.1456	18.52	2.82378	0.540983	0.805014	1.20941	4	3.3448	2.40041	3.02349	4.0497	0.0219496	0.47934	0.50129	0.763	27.6757	5.6684	4.06227	13.6228	17.6851	2.55	0.9	6.941	0.98	0.075	0.136309	1.1389	1.7	32.065	2.58	5.63	7.68605	2.0575	2.06	126.904	2.66	6.19	7.9046	1.3654	1.6	1.68	0.08	44.1371	1.35289	128
21.1456	18.52	2.82378	0.540983	0.805014	1.20941	4.5	3.45334	2.40774	2.97111	4.0497	-0.0219558	0.666082	0.644127	0.763	27.6757	5.6684	4.06227	13.6228	17.6851	2.55	0.9	6.941	0.98	0.075	0.136176	1.14368	1.7	32.065	2.58	5.63	7.68605	2.0575	2.06	126.904	2.66	6.19	7.9046	1.3654	1.6	1.68	0.08	44.1371	1.33853	129
21.1456	18.52	2.82378	0.540983	0.805014	1.20941	4	3.44607	2.40148	3.01994	4.0497	-0.0270167	0.761484	0.734468	0.763	27.6757	5.6684	4.06227	13.6228	17.6851	2.55	0.9	6.941	0.98	0.075	0.136688	1.13707	1.7	32.065	2.58	5.63	7.68605	2.0575	2.06	126.904	2.66	6.19	7.9046	1.3654	1.6	1.68	0.08	44.1371	1.35153	114
21.1456	18.52	2.82378	0.540983	0.805014	1.20941	4.5	3.44633	2.40595	2.96953	4.0497	-0.0209445	0.693164	0.67222	0.763	27.6757	5.6684	4.06227	13.6228	17.6851	2.55	0.9	6.941	0.98	0.075	0.136256	1.14379	1.7	32.065	2.58	5.63	7.68605	2.0575	2.06	126.904	2.66	6.19	7.9046	1.3654	1.6	1.68	0.08	44.1371	1.34012	129
21.1456	18.52	2.82378	0.540983	0.805014	1.20941	4	3.4423	2.39906	3.02146	4.0497	-0.0278757	0.762101	0.734226	0.763	27.6757	5.6684	4.06227	13.6228	17.6851	2.55	0.9	6.941	0.98	0.075	0.136628	1.13809	1.7	32.065	2.58	5.63	7.68605	2.0575	2.06	126.904	2.66	6.19	7.9046	1.3654	1.6	1.68	0.08	44.1371	1.35168	114
21.1456	18.52	2.82378	0.540983	0.805014	1.20941	4.5	3.34443	2.40639	2.96907	4.0497	0.031249	0.661808	0.693057	0.763	27.6757	5.6684	4.06227	13.6228	17.6851	2.55	0.9	6.941	0.98	0.075	0.136494	1.14287	1.7	32.065	2.58	5.63	7.68605	2.0575	2.06	126.904	2.66	6.19	7.9046	1.3654	1.6	1.68	0.08	44.1371	1.33866	109
21.1456	18.52	2.82378	0.540983	0.805014	1.20941	4.5	3.35695	2.40701	2.96598	4.0497	0.0253898	0.656935	0.682325	0.763	27.6757	5.6684	4.06227	13.6228	17.6851	2.55	0.9	6.941	0.98	0.075	0.136635	1.14196	1.7	32.065	2.58	5.63	7.68605	2.0575	2.06	126.904	2.66	6.19	7.9046	1.3654	1.6	1.68	0.08	44.1371	1.33972	109.5
21.1456	18.52	2.82378	0.540983	0.805014	1.20941	4	3.34541	2.40013	3.01791	4.0497	0.0222355	0.469973	0.492208	0.763	27.6757	5.6684	4.06227	13.6228	17.6851	2.55	0.9	6.941	0.98	0.075	0.137007	1.13626	1.7	32.065	2.58	5.63	7.68605	2.0575	2.06	126.904	2.66	6.19	7.9046	1.3654	1.6	1.68	0.08	44.1371	1.35032	128
19.2349	18.154	2.29277	0.476549	0.739742	1.22765	4	3.28169	2.39623	2.64546	3.8536	0.0487483	0.682478	0.731226	0.779	28.8126	6.35739	3.51355	16.666	20.1796	2.09343	0.9	6.941	0.98	0.075	0.13893	1.06473	1.7	32.065	2.58	5.63	7.66231	1.8739	1.82	79.904	2.96	4.13	7.91996	1.3134	1.6	1.98	0.38	56.6576	1.25005	80
19.2349	18.154	2.29277	0.476549	0.739742	1.22765	4	3.47974	2.39655	2.64564	3.8536	-0.0521202	0.727822	0.675702	0.779	28.8126	6.35739	3.51355	16.666	20.1796	2.09343	0.9	6.941	0.98	0.075	0.139043	1.06466	1.7	32.065	2.58	5.63	7.66231	1.8739	1.82	79.904	2.96	4.13	7.91996	1.3134	1.6	1.98	0.38	56.6576	1.2493	71.5
19.2349	18.154	2.29277	0.476549	0.739742	1.22765	4	3.54085	2.39672	2.65244	3.8536	-0.0807214	0.60503	0.524309	0.779	28.8126	6.35739	3.51355	16.666	20.1796	2.09343	0.9	6.941	0.98	0.075	0.13977	1.06364	1.7	32.065	2.58	5.63	7.66231	1.8739	1.82	79.904	2.96	4.13	7.91996	1.3134	1.6	1.98	0.38	56.6576	1.25001	111.5
19.2349	18.154	2.29277	0.476549	0.739742	1.22765	4	3.31685	2.39635	2.65132	3.8536	0.0296379	0.812079	0.841716	0.779	28.8126	6.35739	3.51355	16.666	20.1796	2.09343	0.9	6.941	0.98	0.075	0.13913	1.0635	1.7	32.065	2.58	5.63	7.66231	1.8739	1.82	79.904	2.96	4.13	7.91996	1.3134	1.6	1.98	0.38	56.6576	1.24937	119.5
19.2349	18.154	2.29277	0.476549	0.739742	1.22765	4	3.29146	2.37703	2.6392	3.8536	0.0177984	0.501784	0.519583	0.779	28.8126	6.35739	3.51355	16.666	20.1796	2.09343	0.9	6.941	0.98	0.075	0.13965	1.05994	1.7	32.065	2.58	5.63	7.66231	1.8739	1.82	79.904	2.96	4.13	7.91996	1.3134	1.6	1.98	0.38	56.6576	1.18195	74
19.2349	18.154	2.29277	0.476549	0.739742	1.22765	4	3.48881	2.39544	2.64469	3.8536	-0.0530607	0.5795	0.52644	0.779	28.8126	6.35739	3.51355	16.666	20.1796	2.09343	0.9	6.941	0.98	0.075	0.139007	1.06447	1.7	32.065	2.58	5.63	7.66231	1.8739	1.82	79.904	2.96	4.13	7.91996	1.3134	1.6	1.98	0.38	56.6576	1.24978	111
19.2349	18.154	2.29277	0.476549	0.739742	1.22765	4	3.46965	2.37683	2.64488	3.8536	-0.0725668	0.79208	0.719513	0.779	28.8126	6.35739	3.51355	16.666	20.1796	2.09343	0.9	6.941	0.98	0.075	0.139737	1.05878	1.7	32.065	2.58	5.63	7.66231	1.8739	1.82	79.904	2.96	4.13	7.91996	1.3134	1.6	1.98	0.38	56.6576	1.1847	59
19.2349	18.154	2.29277	0.476549	0.739742	1.22765	4	3.31653	2.39576	2.64488	3.8536	0.0313458	0.811643	0.842989	0.779	28.8126	6.35739	3.51355	16.666	20.1796	2.09343	0.9	6.941	0.98	0.075	0.13912	1.06441	1.7	32.065	2.58	5.63	7.66231	1.8739	1.82	79.904	2.96	4.13	7.91996	1.3134	1.6	1.98	0.38	56.6576	1.24924	128
19.2349	18.154	2.29277	0.476549	0.739742	1.22765	4	3.40798	2.37752	2.64618	3.8536	-0.0383821	0.789716	0.751333	0.779	28.8126	6.35739	3.51355	16.666	20.1796	2.09343	0.9	6.941	0.98	0.075	0.139766	1.05885	1.7	32.065	2.58	5.63	7.66231	1.8739	1.82	79.904	2.96	4.13	7.91996	1.3134	1.6	1.98	0.38	56.6576	1.18357	70.5
19.2349	18.154	2.29277	0.476549	0.739742	1.22765	4	3.25195	2.39593	2.65167	3.8536	0.0654204	0.64102	0.70644	0.779	28.8126	6.35739	3.51355	16.666	20.1796	2.09343	0.9	6.941	0.98	0.075	0.139124	1.06338	1.7	32.065	2.58	5.63	7.66231	1.8739	1.82	79.904	2.96	4.13	7.91996	1.3134	1.6	1.98	0.38	56.6576	1.24974	84.5
19.2349	18.154	2.29277	0.476549	0.739742	1.22765	4	3.44276	2.39556	2.65056	3.8536	-0.0317699	0.743639	0.711869	0.779	28.8126	6.35739	3.51355	16.666	20.1796	2.09343	0.9	6.941	0.98	0.075	0.139207	1.06324	1.7	32.065	2.58	5.63	7.66231	1.8739	1.82	79.904	2.96	4.13	7.91996	1.3134	1.6	1.98	0.38	56.6576	1.24931	68.5
19.2349	18.154	2.29277	0.476549	0.739742	1.22765	4	3.28667	2.37733	2.65186	3.8536	0.0213961	0.472154	0.493551	0.779	28.8126	6.35739	3.51355	16.666	20.1796	2.09343	0.9	6.941	0.98	0.075	0.139853	1.05768	1.7	32.065	2.58	5.63	7.66231	1.8739	1.82	79.904	2.96	4.13	7.91996	1.3134	1.6	1.98	0.38	56.6576	1.18632	64
17.7165	17.759	1.65602	0.452558	0.698948	1.20023	4	3.48223	2.38396	2.4773	3.6081	-0.0717188	0.769526	0.697807	1.828	29.6528	6.75147	3.26889	6.79635	10.0652	1.8213	0.9	6.941	0.98	0.075	0.140315	1.03884	1.7	32.065	2.58	5.63	7.646	1.8056	1.67	35.453	3.16	2.94	7.93055	1.2925	1.6	2.18	0.58	67.7426	1.56767	133.5
17.7165	17.759	1.65602	0.452558	0.698948	1.20023	4	3.78099	2.3843	2.47668	3.6081	-0.224962	0.685523	0.460561	1.828	29.6528	6.75147	3.26889	6.79635	10.0652	1.8213	0.9	6.941	0.98	0.075	0.140223	1.03921	1.7	32.065	2.58	5.63	7.646	1.8056	1.67	35.453	3.16	2.94	7.93055	1.2925	1.6	2.18	0.58	67.7426	1.51839	55
17.7165	17.759	1.65602	0.452558	0.698948	1.20023	4	3.75236	2.38038	2.47546	3.6081	-0.207545	0.659347	0.451801	1.828	29.6528	6.75147	3.26889	6.79635	10.0652	1.8213	0.9	6.941	0.98	0.075	0.143159	1.02923	1.7	32.065	2.58	5.63	7.646	1.8056	1.67	35.453	3.16	2.94	7.93055	1.2925	1.6	2.18	0.58	67.7426	1.5471	115
17.7165	17.759	1.65602	0.452558	0.698948	1.20023	4	3.28552	2.38021	2.4766	3.6081	0.0224111	0.809866	0.832277	1.828	29.6528	6.75147	3.26889	6.79635	10.0652	1.8213	0.9	6.941	0.98	0.075	0.141505	1.02967	1.7	32.065	2.58	5.63	7.646	1.8056	1.67	35.453	3.16	2.94	7.93055	1.2925	1.6	2.18	0.58	67.7426	1.49579	39.5
17.7165	17.759	1.65602	0.452558	0.698948	1.20023	4	3.36283	2.38228	2.47293	3.6081	0.00646728	0.732169	0.738636	1.828	29.6528	6.75147	3.26889	6.79635	10.0652	1.8213	0.9	6.941	0.98	0.075	0.140547	1.03914	1.7	32.065	2.58	5.63	7.646	1.8056	1.67	35.453	3.16	2.94	7.93055	1.2925	1.6	2.18	0.58	67.7426	1.47764	38
17.7165	17.759	1.65602	0.452558	0.698948	1.20023	4	3.22495	2.38396	2.47755	3.6081	0.0853088	0.36238	0.447688	1.828	29.6528	6.75147	3.26889	6.79635	10.0652	1.8213	0.9	6.941	0.98	0.075	0.140292	1.03861	1.7	32.065	2.58	5.63	7.646	1.8056	1.67	35.453	3.16	2.94	7.93055	1.2925	1.6	2.18	0.58	67.7426	1.5674	130
17.7165	17.759	1.65602	0.452558	0.698948	1.20023	4	3.75916	2.37819	2.47284	3.6081	-0.242809	0.747717	0.504907	1.828	29.6528	6.75147	3.26889	6.79635	10.0652	1.8213	0.9	6.941	0.98	0.075	0.141829	1.0296	1.7	32.065	2.58	5.63	7.646	1.8056	1.67	35.453	3.16	2.94	7.93055	1.2925	1.6	2.18	0.58	67.7426	1.5428	106.5
17.7165	17.759	1.65602	0.452558	0.698948	1.20023	4	3.16489	2.38429	2.47693	3.6081	0.130332	0.516036	0.646368	1.828	29.6528	6.75147	3.26889	6.79635	10.0652	1.8213	0.9	6.941	0.98	0.075	0.140201	1.03899	1.7	32.065	2.58	5.63	7.646	1.8056	1.67	35.453	3.16	2.94	7.93055	1.2925	1.6	2.18	0.58	67.7426	1.5195	128.5
17.7165	17.759	1.65602	0.452558	0.698948	1.20023	4	3.09695	2.37869	2.47108	3.6081	0.145678	0.53985	0.685528	1.828	29.6528	6.75147	3.26889	6.79635	10.0652	1.8213	0.9	6.941	0.98	0.075	0.141807	1.02954	1.7	32.065	2.58	5.63	7.646	1.8056	1.67	35.453	3.16	2.94	7.93055	1.2925	1.6	2.18	0.58	67.7426	1.54544	65
17.7165	17.759	1.65602	0.452558	0.698948	1.20023	4	3.10275	2.38037	2.47571	3.6081	0.156048	0.509767	0.665815	1.828	29.6528	6.75147	3.26889	6.79635	10.0652	1.8213	0.9	6.941	0.98	0.075	0.141552	1.02901	1.7	32.065	2.58	5.63	7.646	1.8056	1.67	35.453	3.16	2.94	7.93055	1.2925	1.6	2.18	0.58	67.7426	1.54684	169
17.7165	17.759	1.65602	0.452558	0.698948	1.20023	4	3.32669	2.3802	2.47685	3.6081	0.0327897	0.77536	0.80815	1.828	29.6528	6.75147	3.26889	6.79635	10.0652	1.8213	0.9	6.941	0.98	0.075	0.141483	1.02944	1.7	32.065	2.58	5.63	7.646	1.8056	1.67	35.453	3.16	2.94	7.93055	1.2925	1.6	2.18	0.58	67.7426	1.4969	24
17.7165	17.759	1.65602	0.452558	0.698948	1.20023	4	3.19052	2.37461	2.471	3.6081	0.0816406	0.344	0.425641	1.828	29.6528	6.75147	3.26889	6.79635	10.0652	1.8213	0.9	6.941	0.98	0.075	0.143089	1.02	1.7	32.065	2.58	5.63	7.646	1.8056	1.67	35.453	3.16	2.94	7.93055	1.2925	1.6	2.18	0.58	67.7426	1.61059	94
12.085	10.734	1.9755	0.457397	0.879654	0.81091	5	2.79302	2.00265	2.44057	3.2614	0.245403	0.487363	0.732767	1.625	43.2067	7.08274	3.63182	21.9199	25.5517	1.34824	0.9	6.941	0.98	0.075	0.141326	1.14933	1.19	18.9984	3.98	0.89	7.91808	1.4626	1.7	32.065	2.58	5.63	7.65948	1.983	1.6	3	1.4	67.5531	3.25923	84
12.085	10.734	1.9755	0.457397	0.879654	0.81091	5	2.84812	2.00257	2.44065	3.2614	0.219174	0.428556	0.647731	1.625	43.2067	7.08274	3.63182	21.9199	25.5517	1.34824	0.9	6.941	0.98	0.075	0.141321	1.14932	1.19	18.9984	3.98	0.89	7.91808	1.4626	1.7	32.065	2.58	5.63	7.65948	1.983	1.6	3	1.4	67.5531	3.24693	98.5
12.085	10.734	1.9755	0.457397	0.879654	0.81091	5	2.86945	2.00212	2.44071	3.2614	0.206459	0.583505	0.789964	1.625	43.2067	7.08274	3.63182	21.9199	25.5517	1.34824	0.9	6.941	0.98	0.075	0.141387	1.14934	1.19	18.9984	3.98	0.89	7.91808	1.4626	1.7	32.065	2.58	5.63	7.65948	1.983	1.6	3	1.4	67.5531	3.25908	75
12.085	10.734	1.9755	0.457397	0.879654	0.81091	5	2.81836	2.00218	2.44089	3.2614	0.234544	0.531866	0.766411	1.625	43.2067	7.08274	3.63182	21.9199	25.5517	1.34824	0.9	6.941	0.98	0.075	0.141367	1.14933	1.19	18.9984	3.98	0.89	7.91808	1.4626	1.7	32.065	2.58	5.63	7.65948	1.983	1.6	3	1.4	67.5531	3.24683	82
12.085	10.734	1.9755	0.457397	0.879654	0.81091	5	2.80667	2.00734	2.42973	3.2614	0.246406	0.478344	0.72475	1.625	43.2067	7.08274	3.63182	21.9199	25.5517	1.34824	0.9	6.941	0.98	0.075	0.139659	1.14653	1.19	18.9984	3.98	0.89	7.91808	1.4626	1.7	32.065	2.58	5.63	7.65948	1.983	1.6	3	1.4	67.5531	3.3354	77
12.085	10.734	1.9755	0.457397	0.879654	0.81091	5	2.87024	2.00269	2.4407	3.2614	0.206826	0.583136	0.789962	1.625	43.2067	7.08274	3.63182	21.9199	25.5517	1.34824	0.9	6.941	0.98	0.075	0.141316	1.14932	1.19	18.9984	3.98	0.89	7.91808	1.4626	1.7	32.065	2.58	5.63	7.65948	1.983	1.6	3	1.4	67.5531	3.25993	74.5
12.085	10.734	1.9755	0.457397	0.879654	0.81091	5	2.87231	2.00695	2.42998	3.2614	0.214051	0.62251	0.836561	1.625	43.2067	7.08274	3.63182	21.9199	25.5517	1.34824	0.9	6.941	0.98	0.075	0.139705	1.14654	1.19	18.9984	3.98	0.89	7.91808	1.4626	1.7	32.065	2.58	5.63	7.65948	1.983	1.6	3	1.4	67.5531	3.33662	60
12.085	10.734	1.9755	0.457397	0.879654	0.81091	5	2.81889	2.00262	2.44078	3.2614	0.23378	0.531962	0.765742	1.625	43.2067	7.08274	3.63182	21.9199	25.5517	1.34824	0.9	6.941	0.98	0.075	0.141312	1.14931	1.19	18.9984	3.98	0.89	7.91808	1.4626	1.7	32.065	2.58	5.63	7.65948	1.983	1.6	3	1.4	67.5531	3.24683	82
12.085	10.734	1.9755	0.457397	0.879654	0.81091	5	2.87299	2.00681	2.42987	3.2614	0.21242	0.623161	0.835581	1.625	43.2067	7.08274	3.63182	21.9199	25.5517	1.34824	0.9	6.941	0.98	0.075	0.13972	1.14654	1.19	18.9984	3.98	0.89	7.91808	1.4626	1.7	32.065	2.58	5.63	7.65948	1.983	1.6	3	1.4	67.5531	3.3352	59
12.085	10.734	1.9755	0.457397	0.879654	0.81091	5	2.79341	2.00216	2.44084	3.2614	0.244494	0.487664	0.732157	1.625	43.2067	7.08274	3.63182	21.9199	25.5517	1.34824	0.9	6.941	0.98	0.075	0.141377	1.14933	1.19	18.9984	3.98	0.89	7.91808	1.4626	1.7	32.065	2.58	5.63	7.65948	1.983	1.6	3	1.4	67.5531	3.25978	84
12.085	10.734	1.9755	0.457397	0.879654	0.81091	5	2.84884	2.00223	2.44103	3.2614	0.219342	0.428929	0.64827	1.625	43.2067	7.08274	3.63182	21.9199	25.5517	1.34824	0.9	6.941	0.98	0.075	0.141357	1.14932	1.19	18.9984	3.98	0.89	7.91808	1.4626	1.7	32.065	2.58	5.63	7.65948	1.983	1.6	3	1.4	67.5531	3.24693	98.5
12.085	10.734	1.9755	0.457397	0.879654	0.81091	5	2.8064	2.00643	2.43012	3.2614	0.24631	0.478408	0.724718	1.625	43.2067	7.08274	3.63182	21.9199	25.5517	1.34824	0.9	6.941	0.98	0.075	0.139766	1.14655	1.19	18.9984	3.98	0.89	7.91808	1.4626	1.7	32.065	2.58	5.63	7.65948	1.983	1.6	3	1.4	67.5531	3.33642	77
14.4087	12.007	3.77376	0.624577	0.968998	0.73737	6	2.9423	2.0805	2.9423	3.6035	0.21114	0.488086	0.699226	4.755	43.4	6.37806	4.3011	10.2689	14.57	1.8021	0.9	6.941	0.98	0.065	0.147861	1.18602	1.26	15.9994	3.44	1.95	7.643	2.3927	2.06	126.904	2.66	6.19	7.91341	1.16606	2.46	1.68	0.78	86.95	4.22872	225
12.6984	10.582	3.05281	0.529698	0.890431	0.74108	6	2.8209	1.9947	2.8209	3.4549	0.15046	0.62299	0.77345	4.35	48.6	7.30384	3.55909	8.80107	12.3602	1.39554	0.9	6.941	0.98	0.065	0.148189	1.13717	1.26	15.9994	3.44	1.95	7.64573	2.17375	1.82	79.904	2.96	4.13	7.9097	1.23782	2.46	1.98	0.48	21.8708	3.52336	167
11.7637	9.803	2.04045	0.474142	0.841326	0.7673	6	2.7499	1.9445	2.7499	3.368	0.11497	0.711516	0.826486	1.008	52.9	8.06537	3.11637	13.3817	16.4981	1.16167	0.9	6.941	0.98	0.065	0.148034	1.1006	1.26	15.9994	3.44	1.95	7.62517	2.02081	1.67	35.453	3.16	2.94	7.93072	1.2801	2.46	2.18	0.28	11.0605	3.1685	138
9.24257	9.303	2.00578	0.334061	0.684191	0.84567	4	2.7508	1.90868	1.98793	2.8723	0.0633691	0.784315	0.847684	3.253	59.6864	8.64323	2.51662	7.39157	9.90818	0.740912	0.9	6.941	0.98	0.065	0.154262	0.989652	1.26	15.9994	3.44	1.95	7.62197	1.7595	1.19	18.9984	3.98	0.89	7.91036	1.1988	2.46	3	0.54	55.0885	2.53409	111
9.24257	9.303	2.00578	0.334061	0.684191	0.84567	4	3.00291	1.90867	1.98794	2.8723	-0.0562018	0.72193	0.665729	3.253	59.6864	8.64323	2.51662	7.39157	9.90818	0.740912	0.9	6.941	0.98	0.065	0.154218	0.989653	1.26	15.9994	3.44	1.95	7.62197	1.7595	1.19	18.9984	3.98	0.89	7.91036	1.1988	2.46	3	0.54	55.0885	2.45708	63
9.24257	9.303	2.00578	0.334061	0.684191	0.84567	4	2.96584	1.90284	1.97606	2.8723	-0.0374461	0.682896	0.64545	3.253	59.6864	8.64323	2.51662	7.39157	9.90818	0.740912	0.9	6.941	0.98	0.065	0.1593	0.984648	1.26	15.9994	3.44	1.95	7.62197	1.7595	1.19	18.9984	3.98	0.89	7.91036	1.1988	2.46	3	0.54	55.0885	2.51262	123
9.24257	9.303	2.00578	0.334061	0.684191	0.84567	4	2.59964	1.90285	1.97608	2.8723	0.129683	0.940343	1.07003	3.253	59.6864	8.64323	2.51662	7.39157	9.90818	0.740912	0.9	6.941	0.98	0.065	0.156551	0.984645	1.26	15.9994	3.44	1.95	7.62197	1.7595	1.19	18.9984	3.98	0.89	7.91036	1.1988	2.46	3	0.54	55.0885	2.43628	74
9.24257	9.303	2.00578	0.334061	0.684191	0.84567	4	2.69913	1.90989	1.99432	2.8723	0.113567	0.735095	0.848662	3.253	59.6864	8.64323	2.51662	7.39157	9.90818	0.740912	0.9	6.941	0.98	0.065	0.154646	0.989312	1.26	15.9994	3.44	1.95	7.62197	1.7595	1.19	18.9984	3.98	0.89	7.91036	1.1988	2.46	3	0.54	55.0885	2.40897	24
9.24257	9.303	2.00578	0.334061	0.684191	0.84567	4	2.63027	1.90846	1.98797	2.8723	0.163024	0.442505	0.605528	3.253	59.6864	8.64323	2.51662	7.39157	9.90818	0.740912	0.9	6.941	0.98	0.065	0.154229	0.989607	1.26	15.9994	3.44	1.95	7.62197	1.7595	1.19	18.9984	3.98	0.89	7.91036	1.1988	2.46	3	0.54	55.0885	2.53413	143
9.24257	9.303	2.00578	0.334061	0.684191	0.84567	4	2.96491	1.90407	1.98246	2.8723	-0.0651062	0.748115	0.683009	3.253	59.6864	8.64323	2.51662	7.39157	9.90818	0.740912	0.9	6.941	0.98	0.065	0.156979	0.984303	1.26	15.9994	3.44	1.95	7.62197	1.7595	1.19	18.9984	3.98	0.89	7.91036	1.1988	2.46	3	0.54	55.0885	2.40945	186
9.24257	9.303	2.00578	0.334061	0.684191	0.84567	4	2.61264	1.90845	1.98798	2.8723	0.192671	0.588376	0.781047	3.253	59.6864	8.64323	2.51662	7.39157	9.90818	0.740912	0.9	6.941	0.98	0.065	0.154184	0.989608	1.26	15.9994	3.44	1.95	7.62197	1.7595	1.19	18.9984	3.98	0.89	7.91036	1.1988	2.46	3	0.54	55.0885	2.45769	149
9.24257	9.303	2.00578	0.334061	0.684191	0.84567	4	2.54885	1.90406	1.98244	2.8723	0.20128	0.596544	0.797824	3.253	59.6864	8.64323	2.51662	7.39157	9.90818	0.740912	0.9	6.941	0.98	0.065	0.15695	0.984308	1.26	15.9994	3.44	1.95	7.62197	1.7595	1.19	18.9984	3.98	0.89	7.91036	1.1988	2.46	3	0.54	55.0885	2.41498	189
9.24257	9.303	2.00578	0.334061	0.684191	0.84567	4	2.56298	1.90262	1.9761	2.8723	0.211218	0.573348	0.784566	3.253	59.6864	8.64323	2.51662	7.39157	9.90818	0.740912	0.9	6.941	0.98	0.065	0.156533	0.984603	1.26	15.9994	3.44	1.95	7.62197	1.7595	1.19	18.9984	3.98	0.89	7.91036	1.1988	2.46	3	0.54	55.0885	2.51267	145.5
9.24257	9.303	2.00578	0.334061	0.684191	0.84567	4	2.6842	1.90263	1.97612	2.8723	0.129435	0.760665	0.8901	3.253	59.6864	8.64323	2.51662	7.39157	9.90818	0.740912	0.9	6.941	0.98	0.065	0.156518	0.9846	1.26	15.9994	3.44	1.95	7.62197	1.7595	1.19	18.9984	3.98	0.89	7.91036	1.1988	2.46	3	0.54	55.0885	2.43689	15
9.24257	9.303	2.00578	0.334061	0.684191	0.84567	4	2.58889	1.89823	1.97058	2.8723	0.154243	0.419695	0.573938	3.253	59.6864	8.64323	2.51662	7.39157	9.90818	0.740912	0.9	6.941	0.98	0.065	0.159284	0.9793	1.26	15.9994	3.44	1.95	7.62197	1.7595	1.19	18.9984	3.98	0.89	7.91036	1.1988	2.46	3	0.54	55.0885	2.41546	23
