# Supplementary material for: Machine learning reveals factors that control ion mobility in anti-perovskite solid electrolytes
Source: Royal Society of Chemistry journal article supplement (doi:10.1039/d2ta03613d), 2022-01-01
Supplement: d2ta03613d2.xlsx [file d2ta03613d2.xlsx]

## Sheet: CA_full
	V_atom	V_octa	rho_m	PF_A	t	D_i	B	E_g	eps_e	eps_i	eps	alpha	w_LEO	E_d	r_C	m_C	EN_C	BC_C	alpha_C	BEC_C	CN_C	CCD	COD	CFD	AAD	PW_c	PW_2c	PW	EN_O	r_O	m_O	BC_O	alpha_O	BEC_O	EN_O	r_F	m_F	BC_F	alpha_F	BEC_F	I_C-Ch	I_C-H	I_Ch-H	E_f	Target (vacancy barrier)
V_a	1	0.981072	-0.100125	-0.45632	-0.106582	0.758045	-0.887459	-0.783019	-0.275994	-0.50136	-0.503391	0.966912	-0.700216	-0.178504	0.766259	0.763711	-0.760652	0.206232	0.752364	0.0679222	-0.168369	0.886597	0.968901	0.880125	0.944484	0.408925	0.622452	0.616031	-0.454161	0.492736	0.405367	-0.807798	0.702355	0.350017	-0.324523	0.49055	0.446714	-0.411829	0.303626	-0.257627	-0.215507	-0.411414	-0.354237	-0.493972	0.0667658
V_octa	0.981072	1	-0.176855	-0.485506	-0.259515	0.75235	-0.876894	-0.763023	-0.333517	-0.558651	-0.563081	0.930086	-0.65123	-0.04854	0.755275	0.752765	-0.749748	0.171879	0.743877	-0.0420778	-0.277057	0.898883	0.987731	0.784807	0.878992	0.384278	0.601989	0.589443	-0.500059	0.539884	0.464512	-0.853366	0.754549	0.362737	-0.200351	0.371223	0.32227	-0.356925	0.16236	-0.325904	-0.206595	-0.369142	-0.339362	-0.480374	0.104463
rho_m	-0.100125	-0.176855	1	0.510398	0.253942	-0.290323	-0.000240046	-0.000383389	0.706083	0.116573	0.170571	0.105159	-0.113537	-0.136928	-0.337951	-0.327457	0.347638	-0.0179762	-0.334603	0.290039	0.134461	-0.115625	-0.134231	0.122652	0.0983026	-0.317571	-0.229826	-0.321664	-0.108254	0.190472	0.370766	0.310789	0.0558715	0.112095	-0.338308	0.475358	0.654958	0.242007	0.377265	0.058023	-0.154488	-0.385401	-0.267764	0.196102	-0.0336146
PF_A	-0.45632	-0.485506	0.510398	1	0.0870813	-0.804239	0.341567	0.634986	0.866981	0.482144	0.534258	-0.251591	0.109396	0.401209	-0.882782	-0.892387	0.860049	-0.202808	-0.801948	0.271113	0.0298062	-0.421748	-0.468117	-0.332983	-0.273552	-0.784509	-0.685705	-0.867535	-0.315446	0.359849	0.289404	0.52757	0.0676054	0.106196	-0.342016	0.428302	0.380292	0.558805	0.107679	0.0533879	-0.520629	-0.505603	-0.199617	0.76818	-0.196982
t	-0.106582	-0.259515	0.253942	0.0870813	1	-0.0724557	0.129596	-0.000666376	0.316412	0.470648	0.477334	-0.043453	-0.0601272	-0.575689	0.0674308	0.0622773	-0.0733339	0.135649	0.0767373	0.735962	0.806859	-0.247567	-0.28051	0.319666	0.0794362	0.280596	0.0248561	0.17405	0.626866	-0.569429	-0.47251	0.411586	-0.580685	-0.392447	-0.664613	0.399863	0.277188	-0.494317	0.762109	0.714509	-0.0312639	0.185732	0.438991	-0.147897	-0.193804
D_i	0.758045	0.75235	-0.290323	-0.804239	-0.0724557	1	-0.749856	-0.878539	-0.559778	-0.448071	-0.475995	0.637797	-0.525473	-0.449658	0.925287	0.927376	-0.911813	0.236343	0.852205	-0.0235464	-0.106367	0.712478	0.77654	0.688554	0.688567	0.683626	0.745254	0.847294	-0.0587592	0.0332537	-0.00655271	-0.647754	0.280892	0.18854	0.00911691	0.0357684	0.0163009	-0.498857	0.106477	-0.170617	0.224736	0.0373628	-0.10958	-0.808409	0.149711
B	-0.887459	-0.876894	-0.000240046	0.341567	0.129596	-0.749856	1	0.854837	0.0714137	0.447642	0.434862	-0.90188	0.815838	0.151608	-0.657337	-0.664907	0.639869	-0.167112	-0.613924	-0.0720494	0.21652	-0.855653	-0.93293	-0.81739	-0.907445	-0.319887	-0.524054	-0.504853	0.490767	-0.551359	-0.462212	0.605444	-0.680205	-0.272647	0.381504	-0.521404	-0.394394	0.319299	-0.322608	0.190696	0.347198	0.441303	0.288917	0.544026	-0.0589908
E_g	-0.783019	-0.763023	-0.000383389	0.634986	-0.000666376	-0.878539	0.854837	1	0.306298	0.407979	0.416445	-0.731863	0.672594	0.434524	-0.827839	-0.846381	0.794149	-0.255688	-0.731568	-0.0363613	0.0260144	-0.741243	-0.811264	-0.778942	-0.774099	-0.574656	-0.670734	-0.739603	0.157169	-0.17295	-0.190168	0.620281	-0.396587	-0.243691	0.154819	-0.245203	-0.21537	0.369446	-0.208826	0.185452	-0.0987183	0.151181	0.195258	0.825979	-0.139705
eps_e	-0.275994	-0.333517	0.706083	0.866981	0.316412	-0.559778	0.0714137	0.306298	1	0.469364	0.533104	-0.0348821	-0.150287	0.188626	-0.631054	-0.643196	0.607959	-0.137473	-0.549148	0.549441	0.151112	-0.259986	-0.2889	-0.0545481	-0.0439907	-0.550213	-0.517635	-0.63114	-0.175549	0.286106	0.330892	0.523391	0.0247799	0.00674982	-0.570711	0.589075	0.510092	0.277909	0.417862	0.282514	-0.568994	-0.437685	-0.0680343	0.432143	-0.186118
eps_i	-0.50136	-0.558651	0.116573	0.482144	0.470648	-0.448071	0.447642	0.407979	0.469364	1	0.997286	-0.428506	0.0538357	-0.0631583	-0.484105	-0.496907	0.46186	-0.13325	-0.446834	0.477404	0.355022	-0.52652	-0.570677	-0.268825	-0.35369	-0.254056	-0.373743	-0.374707	0.269706	-0.286109	-0.316733	0.460529	-0.417605	-0.0563955	-0.237329	0.109901	0.00750326	0.197386	0.0905418	0.297376	-0.0407741	0.00425283	0.111676	0.214767	-0.19289
eps	-0.503391	-0.563081	0.170571	0.534258	0.477334	-0.475995	0.434862	0.416445	0.533104	0.997286	1	-0.413481	0.0390511	-0.0447866	-0.516464	-0.529743	0.493225	-0.139136	-0.473923	0.503239	0.352764	-0.526163	-0.570883	-0.262123	-0.342556	-0.289302	-0.401263	-0.411652	0.24378	-0.250278	-0.275887	0.484898	-0.398061	-0.0534724	-0.274985	0.154421	0.0497227	0.212298	0.121595	0.308487	-0.0865126	-0.0324211	0.101329	0.241812	-0.200337
alpha	0.966912	0.930086	0.105159	-0.251591	-0.043453	0.637797	-0.90188	-0.731863	-0.0348821	-0.428506	-0.413481	1	-0.762264	-0.150863	0.626283	0.623931	-0.622051	0.178539	0.625622	0.179348	-0.154816	0.854663	0.931601	0.89842	0.97219	0.272081	0.512325	0.470567	-0.525068	0.596301	0.527416	-0.689816	0.744515	0.353841	-0.477347	0.664433	0.614785	-0.344056	0.429708	-0.202381	-0.368534	-0.547862	-0.403178	-0.38854	0.0265647
w_LEO	-0.700216	-0.65123	-0.113537	0.109396	-0.0601272	-0.525473	0.815838	0.672594	-0.150287	0.0538357	0.0390511	-0.762264	1	0.19359	-0.419167	-0.428202	0.402568	-0.0649316	-0.381702	-0.248061	0.111614	-0.644366	-0.699962	-0.737257	-0.806141	-0.16224	-0.370981	-0.321076	0.424517	-0.487583	-0.358832	0.383009	-0.546192	-0.196889	0.531708	-0.632873	-0.513121	0.206759	-0.427223	0.034821	0.466669	0.474544	0.303457	0.37607	0.0635271
E_d	-0.178504	-0.04854	-0.136928	0.401209	-0.575689	-0.449658	0.151608	0.434524	0.188626	-0.0631583	-0.0447866	-0.150863	0.19359	1	-0.481966	-0.481592	0.476847	-0.351432	-0.440783	-0.346994	-0.558236	-0.066959	-0.0641016	-0.502217	-0.313723	-0.518263	-0.438301	-0.564031	-0.414571	0.481528	0.44507	0.0420879	0.364506	-0.0455944	0.170518	-0.144684	-0.209198	0.371893	-0.37146	-0.1431	-0.496986	-0.106396	0.0088345	0.547946	-0.0483372
r_C	0.766259	0.755275	-0.337951	-0.882782	0.0674308	0.925287	-0.657337	-0.827839	-0.631054	-0.484105	-0.516464	0.626283	-0.419167	-0.481966	1	0.996102	-0.993427	0.279827	0.961648	0.0438259	0.0533633	0.672878	0.740698	0.708088	0.653404	0.798737	0.774574	0.930517	0.120527	-0.120392	-0.0836087	-0.672659	0.167849	0.0555642	-0.0297495	0.000748606	-0.0210317	-0.68569	0.203628	-0.0238049	0.267318	0.195751	0.0646276	-0.828769	0.146653
m_C	0.763711	0.752765	-0.327457	-0.892387	0.0622773	0.927376	-0.664907	-0.846381	-0.643196	-0.496907	-0.529743	0.623931	-0.428202	-0.481592	0.996102	1	-0.979458	0.271886	0.935428	-0.0016655	0.0511265	0.676094	0.743384	0.70829	0.653656	0.79578	0.775706	0.929543	0.115474	-0.115346	-0.0801039	-0.661108	0.177421	0.0370333	-0.0285024	0.000717226	-0.0201501	-0.665263	0.200784	-0.0321124	0.261623	0.191307	0.0619186	-0.827458	0.151951
EN_C	-0.760652	-0.749748	0.347638	0.860049	-0.0733339	-0.911813	0.639869	0.794149	0.607959	0.46186	0.493225	-0.622051	0.402568	0.476847	-0.993427	-0.979458	1	-0.286877	-0.984488	-0.102349	-0.0556454	-0.660878	-0.728597	-0.69959	-0.645476	-0.793285	-0.764097	-0.920957	-0.125681	0.125541	0.0871841	0.679824	-0.153475	-0.0789646	0.0310217	-0.00078062	0.0219312	0.704223	-0.204951	0.0127477	-0.271599	-0.199239	-0.0673914	0.820831	-0.138072
BC_C	0.206232	0.171879	-0.0179762	-0.202808	0.135649	0.236343	-0.167112	-0.255688	-0.137473	-0.13325	-0.139136	0.178539	-0.0649316	-0.351432	0.279827	0.271886	-0.286877	1	0.28136	0.147597	0.285018	0.15396	0.169269	0.3076	0.231441	0.230537	0.24996	0.284889	0.0525496	-0.079749	-0.0697947	-0.176089	0.0035767	0.181656	-0.0502897	0.0809412	0.08847	-0.10278	0.0687106	-0.0750776	0.20303	-0.0440575	0.00336568	-0.32968	0.0369827
alpha_C	0.752364	0.743877	-0.334603	-0.801948	0.0767373	0.852205	-0.613924	-0.731568	-0.549148	-0.446834	-0.473923	0.625622	-0.381702	-0.440783	0.961648	0.935428	-0.984488	0.28136	1	0.177344	0.0453607	0.643085	0.712106	0.682171	0.632708	0.761384	0.728629	0.880991	0.120368	-0.107639	-0.0498909	-0.677081	0.151988	0.0908835	-0.0502174	0.0193633	-0.00514904	-0.721647	0.223129	0.016599	0.242413	0.193371	0.0773498	-0.781253	0.123503
BEC_C	0.0679222	-0.0420778	0.290039	0.271113	0.735962	-0.0235464	-0.0720494	-0.0363613	0.549441	0.477404	0.503239	0.179348	-0.248061	-0.346994	0.0438259	-0.0016655	-0.102349	0.147597	0.177344	1	0.543315	-0.0520939	-0.063231	0.372089	0.235342	0.122114	-0.00934567	0.063282	0.280237	-0.194911	-0.10978	0.193867	-0.255142	-0.0280283	-0.665845	0.52406	0.384534	-0.368814	0.658621	0.544116	-0.203952	-0.0706108	0.198572	-0.155777	-0.184348
CN_C	-0.168369	-0.277057	0.134461	0.0298062	0.806859	-0.106367	0.21652	0.0260144	0.151112	0.355022	0.352764	-0.154816	0.111614	-0.558236	0.0533633	0.0511265	-0.0556454	0.285018	0.0453607	0.543315	1	-0.272891	-0.301224	0.208023	-0.0406882	0.26094	0.0247254	0.162853	0.569773	-0.561922	-0.469026	0.283947	-0.535151	-0.219059	-0.39457	0.190447	0.0757345	-0.311062	0.444172	0.465853	0.181601	0.194178	0.37711	-0.124859	-0.085996
CCD	0.886597	0.898883	-0.115625	-0.421748	-0.247567	0.712478	-0.855653	-0.741243	-0.259986	-0.52652	-0.526163	0.854663	-0.644366	-0.066959	0.672878	0.676094	-0.660878	0.15396	0.643085	-0.0520939	-0.272891	1	0.912405	0.727599	0.823499	0.15234	0.666191	0.497963	-0.487717	0.524406	0.442859	-0.727484	0.700095	0.32474	-0.203471	0.36946	0.313734	-0.296161	0.166355	-0.301234	-0.219519	-0.373469	-0.327667	-0.454189	0.340845
COD	0.968901	0.987731	-0.134231	-0.468117	-0.28051	0.77654	-0.93293	-0.811264	-0.2889	-0.570677	-0.570883	0.931601	-0.699962	-0.0641016	0.740698	0.743384	-0.728597	0.169269	0.712106	-0.063231	-0.301224	0.912405	1	0.787929	0.892734	0.3634	0.595047	0.573345	-0.531481	0.571842	0.486915	-0.809441	0.767523	0.360519	-0.20816	0.388409	0.326634	-0.323712	0.166212	-0.335426	-0.232614	-0.398079	-0.351966	-0.504655	0.11434
CFD	0.880125	0.784807	0.122652	-0.332983	0.319666	0.688554	-0.81739	-0.778942	-0.0545481	-0.268825	-0.262123	0.89842	-0.737257	-0.502217	0.708088	0.70829	-0.69959	0.3076	0.682171	0.372089	0.208023	0.727599	0.787929	1	0.957524	0.450902	0.58951	0.619407	-0.231561	0.271035	0.195895	-0.555993	0.440861	0.255381	-0.590388	0.690723	0.616542	-0.497171	0.603002	-0.0190138	-0.192769	-0.416727	-0.255162	-0.519042	-0.00234758
AAD	0.944484	0.878992	0.0983026	-0.273552	0.0794362	0.688567	-0.907445	-0.774099	-0.0439907	-0.35369	-0.342556	0.97219	-0.806141	-0.313723	0.653404	0.653656	-0.645476	0.231441	0.632708	0.235342	-0.0406882	0.823499	0.892734	0.957524	1	0.323478	0.553051	0.524808	-0.461883	0.503741	0.384021	-0.641634	0.651303	0.355884	-0.526091	0.701697	0.635525	-0.366885	0.484318	-0.174833	-0.309729	-0.552125	-0.399504	-0.440487	0.0061537
PW_c	0.408925	0.384278	-0.317571	-0.784509	0.280596	0.683626	-0.319887	-0.574656	-0.550213	-0.254056	-0.289302	0.272081	-0.16224	-0.518263	0.798737	0.79578	-0.793285	0.230537	0.761384	0.122114	0.26094	0.15234	0.3634	0.450902	0.323478	1	0.426306	0.829052	0.442772	-0.444262	-0.344876	-0.341303	-0.208283	-0.182237	-0.00203547	-0.158442	-0.188267	-0.684086	0.219467	0.21751	0.369935	0.448302	0.322936	-0.728834	-0.214739
PW_2c	0.622452	0.601989	-0.229826	-0.685705	0.0248561	0.745254	-0.524054	-0.670734	-0.517635	-0.373743	-0.401263	0.512325	-0.370981	-0.438301	0.774574	0.775706	-0.764097	0.24996	0.728629	-0.00934567	0.0247254	0.666191	0.595047	0.58951	0.553051	0.426306	1	0.859245	0.0212516	-0.0533131	-0.0771702	-0.570576	0.178474	0.14602	0.0088544	0.0303281	0.0620093	-0.449783	0.119509	-0.130307	0.258466	0.0619259	-0.0848902	-0.626486	0.145531
PW	0.616031	0.589443	-0.321664	-0.867535	0.17405	0.847294	-0.504853	-0.739603	-0.63114	-0.374707	-0.411652	0.470567	-0.321076	-0.564031	0.930517	0.929543	-0.920957	0.284889	0.880991	0.063282	0.162853	0.497963	0.573345	0.619407	0.524808	0.829052	0.859245	1	0.263536	-0.284198	-0.24274	-0.545722	-0.00746478	-0.0127967	0.0043223	-0.0708556	-0.0681388	-0.664906	0.19799	0.0424577	0.368981	0.291807	0.130154	-0.799443	-0.0314793
EN_O	-0.454161	-0.500059	-0.108254	-0.315446	0.626866	-0.0587592	0.490767	0.157169	-0.175549	0.269706	0.24378	-0.525068	0.424517	-0.414571	0.120527	0.115474	-0.125681	0.0525496	0.120368	0.280237	0.569773	-0.487717	-0.531481	-0.231561	-0.461883	0.442772	0.0212516	0.263536	1	-0.959991	-0.661263	0.488027	-0.920157	-0.684384	0.0251985	-0.426076	-0.461171	-0.505011	0.235153	0.720097	0.434501	0.857699	0.789034	-0.285054	-0.0541777
r_O	0.492736	0.539884	0.190472	0.359849	-0.569429	0.0332537	-0.551359	-0.17295	0.286106	-0.286109	-0.250278	0.596301	-0.487583	0.481528	-0.120392	-0.115346	0.125541	-0.079749	-0.107639	-0.194911	-0.561922	0.524406	0.571842	0.271035	0.503741	-0.444262	-0.0533131	-0.284198	-0.959991	1	0.820299	-0.417442	0.942261	0.530002	-0.180533	0.515626	0.487101	0.401503	-0.0828914	-0.545954	-0.596925	-0.830109	-0.661203	0.270221	0.00628137
m_O	0.405367	0.464512	0.370766	0.289404	-0.47251	-0.00655271	-0.462212	-0.190168	0.330892	-0.316733	-0.275887	0.527416	-0.358832	0.44507	-0.0836087	-0.0801039	0.0871841	-0.0697947	-0.0498909	-0.10978	-0.469026	0.442859	0.486915	0.195895	0.384021	-0.344876	-0.0771702	-0.24274	-0.661263	0.820299	1	-0.266959	0.771063	0.264829	-0.19106	0.396147	0.349456	0.260102	0.0066973	-0.279333	-0.501172	-0.565224	-0.390744	0.111662	-0.00813513
BC_O	-0.807798	-0.853366	0.310789	0.52757	0.411586	-0.647754	0.605444	0.620281	0.523391	0.460529	0.484898	-0.689816	0.383009	0.0420879	-0.672659	-0.661108	0.679824	-0.176089	-0.677081	0.193867	0.283947	-0.727484	-0.809441	-0.555993	-0.641634	-0.341303	-0.570576	-0.545722	0.488027	-0.417442	-0.266959	1	-0.668095	-0.6197	-0.182936	-0.0740533	-0.150877	0.12067	0.233611	0.620965	-0.161776	0.312237	0.502673	0.437139	-0.183223
alpha_O	0.702355	0.754549	0.0558715	0.0676054	-0.580685	0.280892	-0.680205	-0.396587	0.0247799	-0.417605	-0.398061	0.744515	-0.546192	0.364506	0.167849	0.177421	-0.153475	0.0035767	0.151988	-0.255142	-0.535151	0.700095	0.767523	0.440861	0.651303	-0.208283	0.178474	-0.00746478	-0.920157	0.942261	0.771063	-0.668095	1	0.58584	-0.109588	0.452296	0.448336	0.25654	-0.112593	-0.62437	-0.441352	-0.758503	-0.67401	0.042421	0.0700559
BEC_O	0.350017	0.362737	0.112095	0.106196	-0.392447	0.18854	-0.272647	-0.243691	0.00674982	-0.0563955	-0.0534724	0.353841	-0.196889	-0.0455944	0.0555642	0.0370333	-0.0789646	0.181656	0.0908835	-0.0280283	-0.219059	0.32474	0.360519	0.255381	0.355884	-0.182237	0.14602	-0.0127967	-0.684384	0.530002	0.264829	-0.6197	0.58584	1	0.228626	0.20391	0.377227	0.514492	-0.406446	-0.852867	0.216067	-0.691131	-0.865595	-0.020544	0.146294
EN_O	-0.324523	-0.200351	-0.338308	-0.342016	-0.664613	0.00911691	0.381504	0.154819	-0.570711	-0.237329	-0.274985	-0.477347	0.531708	0.170518	-0.0297495	-0.0285024	0.0310217	-0.0502897	-0.0502174	-0.665845	-0.39457	-0.203471	-0.20816	-0.590388	-0.526091	-0.00203547	0.0088544	0.0043223	0.0251985	-0.180533	-0.19106	-0.182936	-0.109588	0.228626	1	-0.878246	-0.621921	0.392322	-0.90022	-0.540812	0.69196	0.366571	-0.136478	-0.0201163	0.259901
r_F	0.49055	0.371223	0.475358	0.428302	0.399863	0.0357684	-0.521404	-0.245203	0.589075	0.109901	0.154421	0.664433	-0.632873	-0.144684	0.000748606	0.000717226	-0.00078062	0.0809412	0.0193633	0.52406	0.190447	0.36946	0.388409	0.690723	0.701697	-0.158442	0.0303281	-0.0708556	-0.426076	0.515626	0.396147	-0.0740533	0.452296	0.20391	-0.878246	1	0.873039	-0.104641	0.722035	0.104021	-0.652328	-0.742821	-0.332538	0.103281	-0.18274
m_F	0.446714	0.32227	0.654958	0.380292	0.277188	0.0163009	-0.394394	-0.21537	0.510092	0.00750326	0.0497227	0.614785	-0.513121	-0.209198	-0.0210317	-0.0201501	0.0219312	0.08847	-0.00514904	0.384534	0.0757345	0.313734	0.326634	0.616542	0.635525	-0.188267	0.0620093	-0.0681388	-0.461171	0.487101	0.349456	-0.150877	0.448336	0.377227	-0.621921	0.873039	1	0.0490733	0.574051	-0.114339	-0.400142	-0.749645	-0.566465	0.146858	-0.0937912
BC_F	-0.411829	-0.356925	0.242007	0.558805	-0.494317	-0.498857	0.319299	0.369446	0.277909	0.197386	0.212298	-0.344056	0.206759	0.371893	-0.68569	-0.665263	0.704223	-0.10278	-0.721647	-0.368814	-0.311062	-0.296161	-0.323712	-0.497171	-0.366885	-0.684086	-0.449783	-0.664906	-0.505011	0.401503	0.260102	0.12067	0.25654	0.514492	0.392322	-0.104641	0.0490733	1	-0.632433	-0.624403	0.055395	-0.46298	-0.573364	0.509581	0.0374399
alpha_F	0.303626	0.16236	0.377265	0.107679	0.762109	0.106477	-0.322608	-0.208826	0.417862	0.0905418	0.121595	0.429708	-0.427223	-0.37146	0.203628	0.200784	-0.204951	0.0687106	0.223129	0.658621	0.444172	0.166355	0.166212	0.603002	0.484318	0.219467	0.119509	0.19799	0.235153	-0.0828914	0.0066973	0.233611	-0.112593	-0.406446	-0.90022	0.722035	0.574051	-0.632433	1	0.685966	-0.48972	-0.0893003	0.286743	-0.119036	-0.199051
BEC_F	-0.257627	-0.325904	0.058023	0.0533879	0.714509	-0.170617	0.190696	0.185452	0.282514	0.297376	0.308487	-0.202381	0.034821	-0.1431	-0.0238049	-0.0321124	0.0127477	-0.0750776	0.016599	0.544116	0.465853	-0.301234	-0.335426	-0.0190138	-0.174833	0.21751	-0.130307	0.0424577	0.720097	-0.545954	-0.279333	0.620965	-0.62437	-0.852867	-0.540812	0.104021	-0.114339	-0.624403	0.685966	1	-0.288623	0.542032	0.829568	-0.0640537	-0.220197
I_C-Ch	-0.215507	-0.206595	-0.154488	-0.520629	-0.0312639	0.224736	0.347198	-0.0987183	-0.568994	-0.0407741	-0.0865126	-0.368534	0.466669	-0.496986	0.267318	0.261623	-0.271599	0.20303	0.242413	-0.203952	0.181601	-0.219519	-0.232614	-0.192769	-0.309729	0.369935	0.258466	0.368981	0.434501	-0.596925	-0.501172	-0.161776	-0.441352	0.216067	0.69196	-0.652328	-0.400142	0.055395	-0.48972	-0.288623	1	0.43607	-0.0470242	-0.387946	0.217876
I_C-H	-0.411414	-0.369142	-0.385401	-0.505603	0.185732	0.0373628	0.441303	0.151181	-0.437685	0.00425283	-0.0324211	-0.547862	0.474544	-0.106396	0.195751	0.191307	-0.199239	-0.0440575	0.193371	-0.0706108	0.194178	-0.373469	-0.398079	-0.416727	-0.552125	0.448302	0.0619259	0.291807	0.857699	-0.830109	-0.565224	0.312237	-0.758503	-0.691131	0.366571	-0.742821	-0.749645	-0.46298	-0.0893003	0.542032	0.43607	1	0.806116	-0.288239	0.042269
I_Ch-H	-0.354237	-0.339362	-0.267764	-0.199617	0.438991	-0.10958	0.288917	0.195258	-0.0680343	0.111676	0.101329	-0.403178	0.303457	0.0088345	0.0646276	0.0619186	-0.0673914	0.00336568	0.0773498	0.198572	0.37711	-0.327667	-0.351966	-0.255162	-0.399504	0.322936	-0.0848902	0.130154	0.789034	-0.661203	-0.390744	0.502673	-0.67401	-0.865595	-0.136478	-0.332538	-0.566465	-0.573364	0.286743	0.829568	-0.0470242	0.806116	1	-0.139392	-0.102938
E_f	-0.493972	-0.480374	0.196102	0.76818	-0.147897	-0.808409	0.544026	0.825979	0.432143	0.214767	0.241812	-0.38854	0.37607	0.547946	-0.828769	-0.827458	0.820831	-0.32968	-0.781253	-0.155777	-0.124859	-0.454189	-0.504655	-0.519042	-0.440487	-0.728834	-0.626486	-0.799443	-0.285054	0.270221	0.111662	0.437139	0.042421	-0.020544	-0.0201163	0.103281	0.146858	0.509581	-0.119036	-0.0640537	-0.387946	-0.288239	-0.139392	1	-0.115413
Target (vacancy barrier)	0.0667658	0.104463	-0.0336146	-0.196982	-0.193804	0.149711	-0.0589908	-0.139705	-0.186118	-0.19289	-0.200337	0.0265647	0.0635271	-0.0483372	0.146653	0.151951	-0.138072	0.0369827	0.123503	-0.184348	-0.085996	0.340845	0.11434	-0.00234758	0.0061537	-0.214739	0.145531	-0.0314793	-0.0541777	0.00628137	-0.00813513	-0.183223	0.0700559	0.146294	0.259901	-0.18274	-0.0937912	0.0374399	-0.199051	-0.220197	0.217876	0.042269	-0.102938	-0.115413	1
